# Supplementary material for: Universal Non-Extensive Statistical Physics Temporal Pattern of Major Subduction Zone Aftershock Sequences
Source: MDPI journal article supplement (doi:10.3390/e24121850), 2022-12-19
Supplement: s1 [file s1]

## Supplementary Material

# Universal Non-Extensive Statistical Physics Temporal Pattern of Major Subduction Zone Aftershock Sequences

Eleni-Apostolia Anyfadi 1,2, Sophia-Ekaterini Avgerinou 1,2, Georgios Michas 1,2 and Filippos Vallianatos 1,2,\*

<sup>1</sup> Section of Geophysics-Geothermics, Department of Geology and Geoenvironment, National and Kapodistrian University of Athens, 15784 Athens, Greece

<sup>2</sup> Institute of Physics of Earth's Interior and Geohazards, UNESCO Chair on Solid Earth Physics and Geohazards Risk Reduction, Hellenic Mediterranean University Research & Innovation Center, Crete, 73133 Chania, Greece

\* Correspondence: fvallian@geol.uoa.gr

Herein, we present the cumulative interevent time distributions for all aftershock sequences that were studied. Figures S1a-S42a present a typical Q-exponential (see Eq. 5) pattern in the log-log plot of the cumulative distribution function ( $P(>T)$ ) of the aftershock interevent times and reveal that for large values of  $T$  ( $T > T_c$ ), where  $T_c$  is a critical crossover interevent time, there is a deviation from the Q-exponential function. The entropic parameter ( $q$ ) is obtained by fitting a Q-exponential function to the observed data up to a value near  $T_c$ . The Q-logarithm (see Eq. 7) implies that the expression  $\ln_Q P(>T) = -\frac{1}{T^*}T$  is linear with  $T$ , with a slope of  $-1/T^*$  when the Q, which describes the distribution of the interevent time intervals, is introduced [48]. Figures S1b-S42b present  $\ln_Q P(>T)$  as a function of the interevent time ( $T$ ), introducing the estimated  $q$  parameter, as presented in Table 1, while  $T_c$  is estimated from the linearity deviation. Figures S1c-S42c present the evolution of interevent time ( $T$ ) as a function of the time ( $t$ ) since the main event, indicating that at times close to the mainshock the main driving mechanism is governed by NESP, while as the aftershock sequence evolves to  $T > T_c$ , the system recovers BG statistical mechanics. Furthermore, the correlation coefficient for  $\ln_Q P(>T)$  with  $T$ , for  $T < T_c$ , is further provided.

### 1. The 1976 $M_w$ 8.0 Kermadec Island Earthquake (New Zealand)

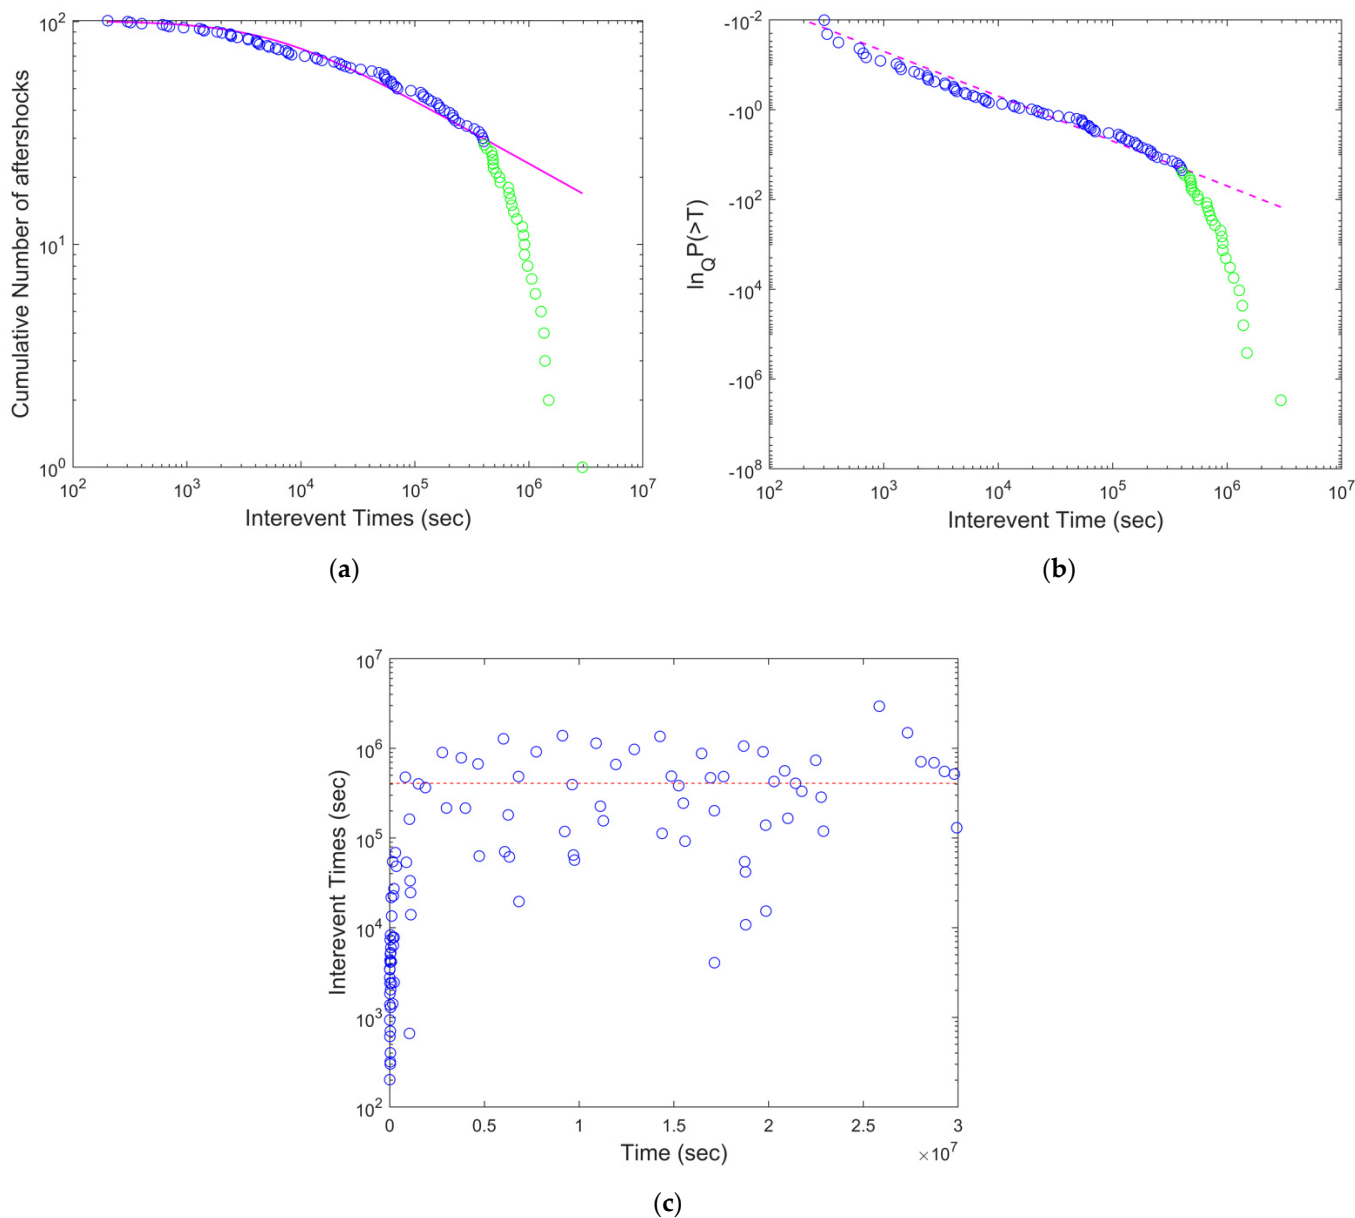

**Figure S1.** (a) The cumulative distribution function of the interevent times for the 1976  $M_w$  8.0 Kermadec Island Earthquake (New Zealand). The magenta line is the Q-exponential function fitting with  $q = 1.78$ . (b) The Q-logarithmic function of  $P(>T)$  as a function of the interevent times, where the dashed line is the fitting with  $q = 1.78$ . The deviation from linearity suggests  $T_c$  values close to  $4 \times 10^5$  s. The correlation coefficient for the Q-logarithmic function up to  $T_c$  is  $R^2 = 0.9827$ . (c) The evolution of the interevent time ( $T$ ) as a function of the time ( $t$ ) since the main event. The  $T$  value is indicated by the red dashed line.

## 2. The 1977 $M_w$ 8.3 Waingapu Earthquake (Indonesia)

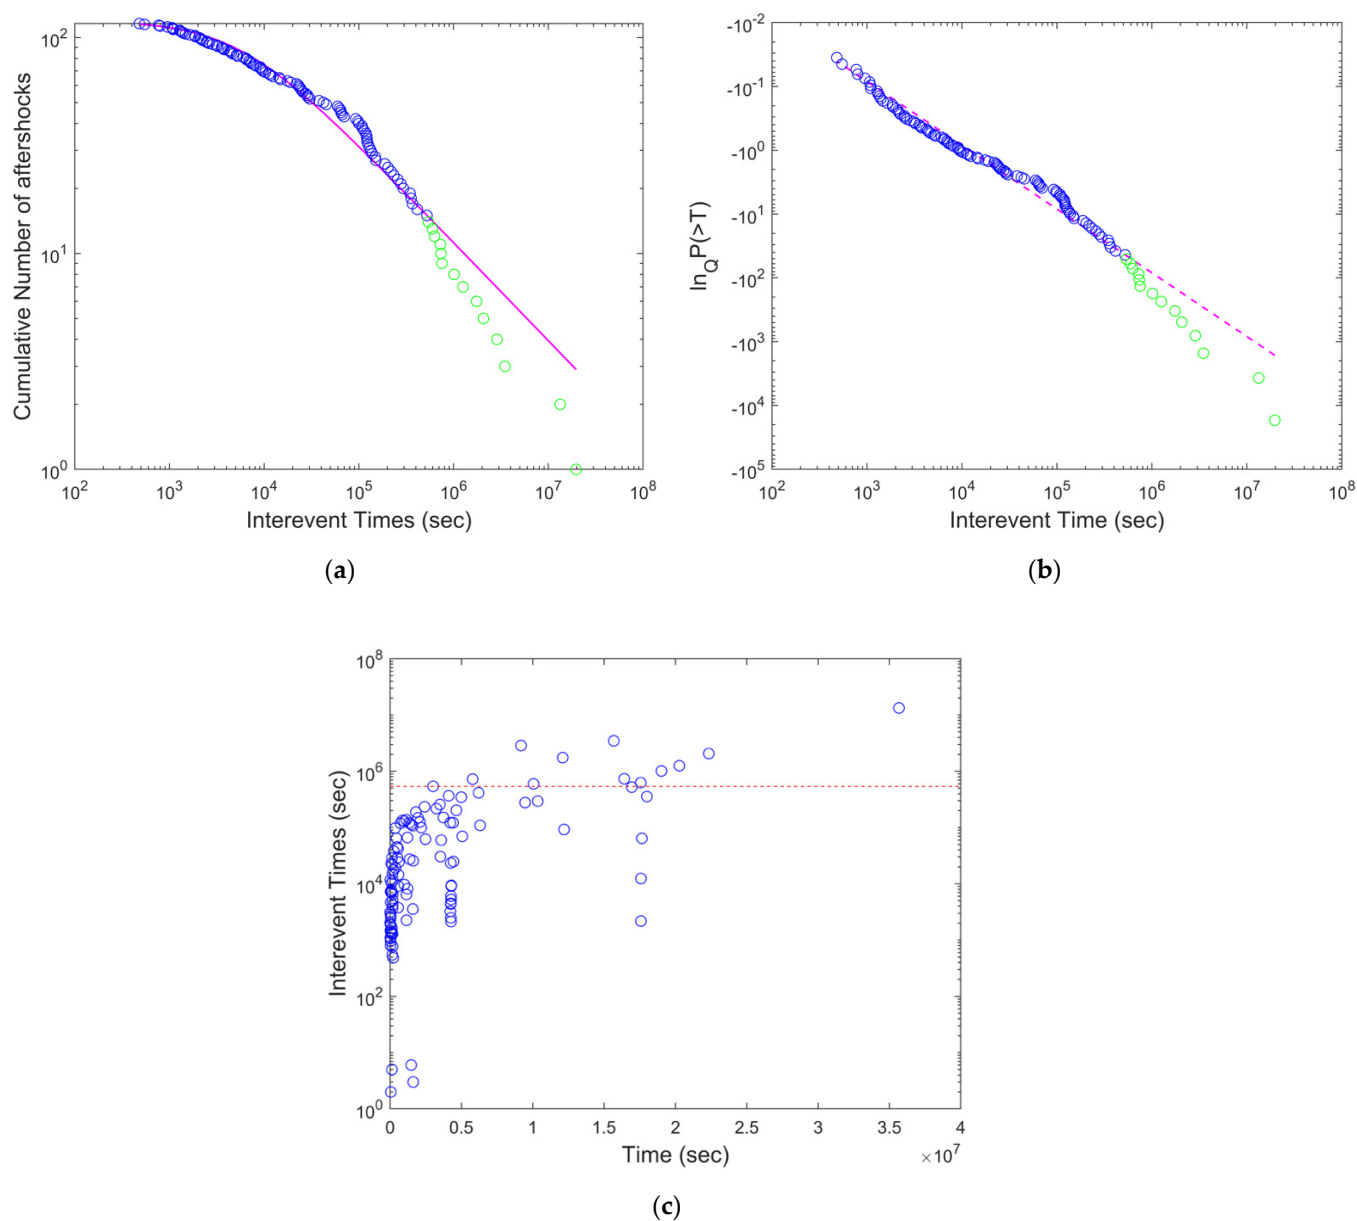

**Figure S2.** (a) The cumulative distribution function of the interevent times of the 1977  $M_w$  8.3 Waingapu Earthquake (Indonesia). The magenta line is the Q-exponential function fitting with  $q = 1.69$ . (b) The Q-logarithmic function of  $P(>T)$  as a function of the interevent times, where the dashed line is the fitting with  $q = 1.69$ . The deviation from linearity suggests  $T_c$  values close to  $5 \times 10^5$ s. The correlation coefficient for the Q-logarithmic function up to  $T_c$  is  $R^2 = 0.9731$ . (c) The evolution of the interevent time ( $T$ ) as a function of the time ( $t$ ) since the main event. The  $T$  value is indicated by the red dashed line.

### 3. The 1986 $M_w$ 7.7 Kermadec Island Earthquake (New Zealand)

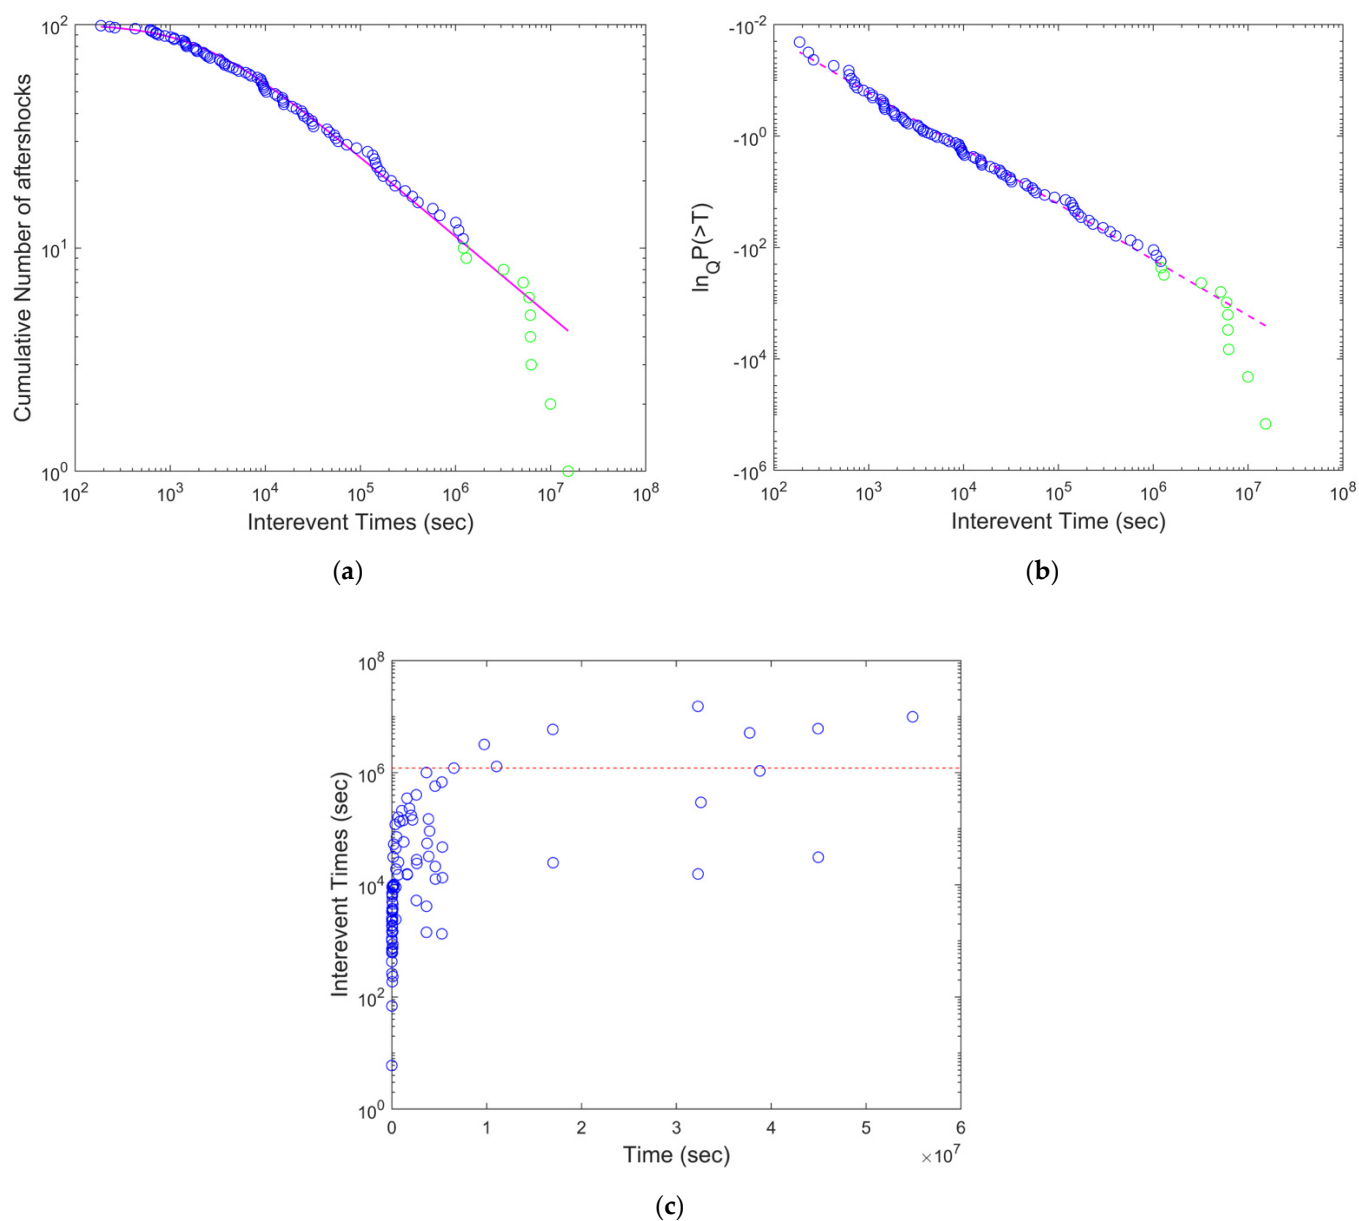

**Figure S3.** (a) The cumulative distribution function of the interevent times of the 1986  $M_w$  7.7 Kermadec Island Earthquake (New Zealand). The magenta line is the Q-exponential function fitting with  $q = 1.74$ . (b) The Q-logarithmic function of  $P(>T)$  as a function of the interevent times, where the dashed line is the fitting with  $q = 1.74$ . The deviation from linearity suggests  $T_c$  values close to  $1 \times 10^6$  s. The correlation coefficient for the Q-logarithmic function up to  $T_c$  is  $R^2 = 0.9916$ . (c) The evolution of the interevent time ( $T$ ) as a function of the time ( $t$ ) since the main event. The  $T$  value is indicated by the red dashed line.



#### 4. The 1994 $M_w$ 8.3 Shikotan Earthquake (Russia)

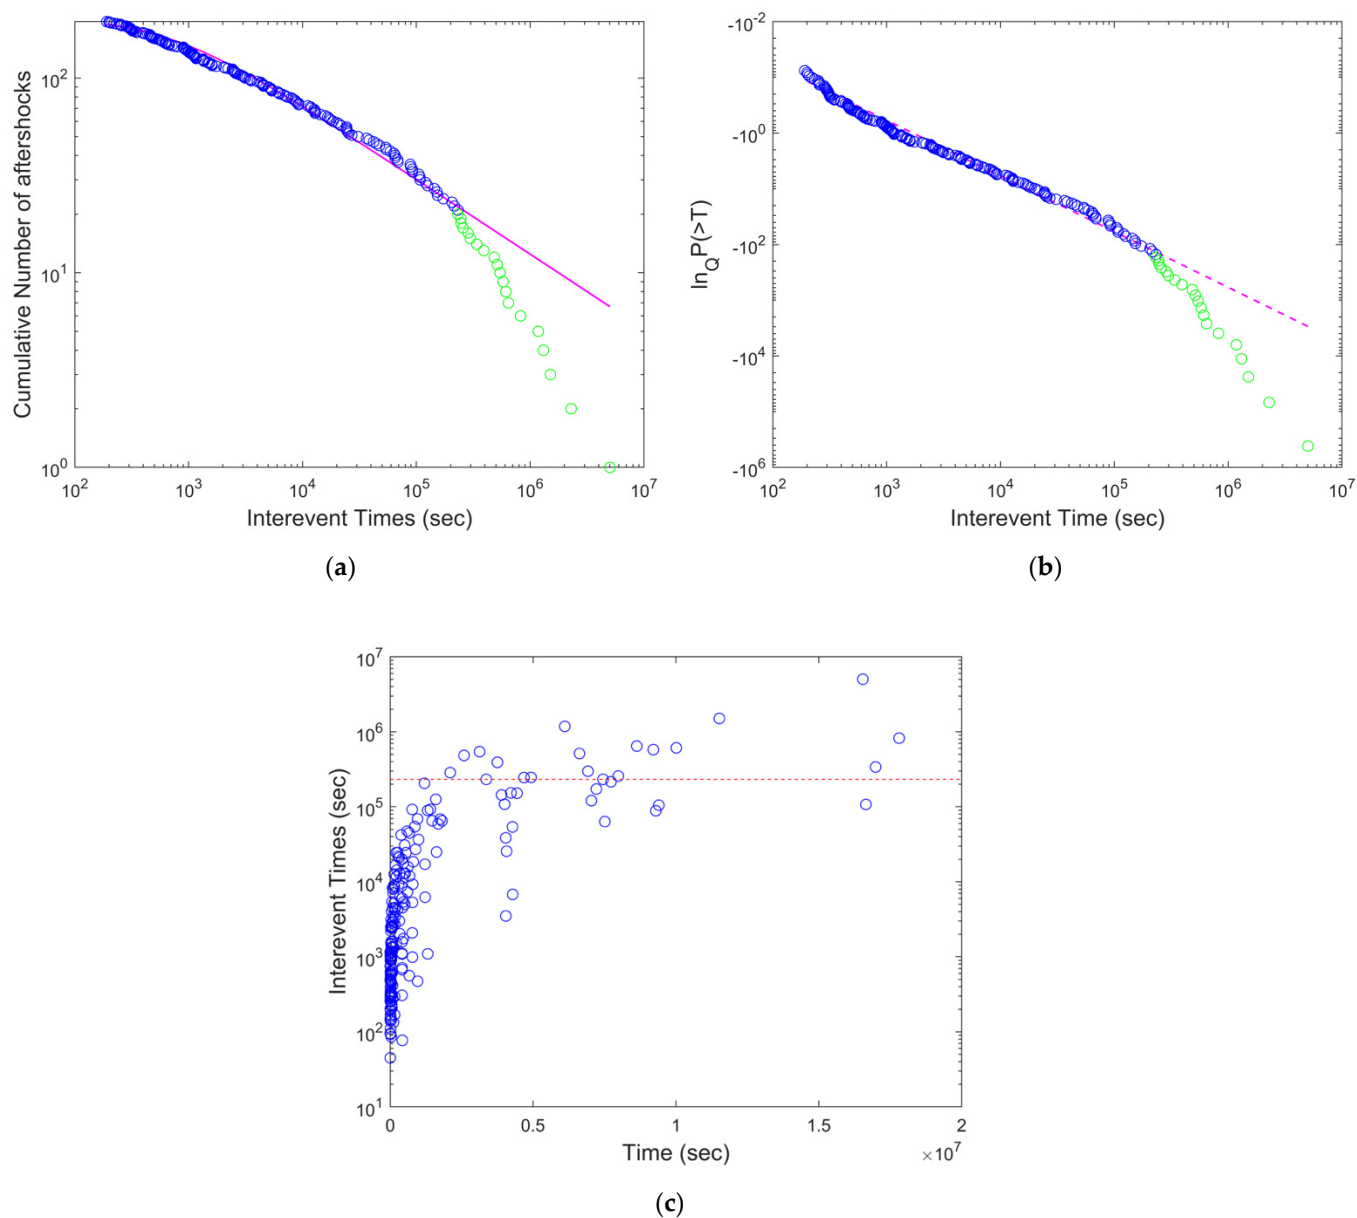

**Figure S4.** (a) The cumulative distribution function of the interevent times of the 1994  $M_w$  8.3 Shikotan Earthquake (Russia). The magenta line is the Q-exponential function fitting with  $q = 1.72$ . (b) The Q-logarithmic function of  $P(>T)$  as a function of the interevent times, where the dashed line is the fitting with  $q = 1.72$ . The deviation from linearity suggests  $T_c$  values close to  $2 \times 10^5$  s. The correlation coefficient for the Q-logarithmic function up to  $T_c$  is  $R^2 = 0.9821$ . (c) The evolution of the interevent time ( $T$ ) as a function of the time ( $t$ ) since the main event. The  $T$  value is indicated by the red dashed line.

### 5. The 1995 $M_w$ 7.7 Panguna Earthquake (Papua New Guinea)

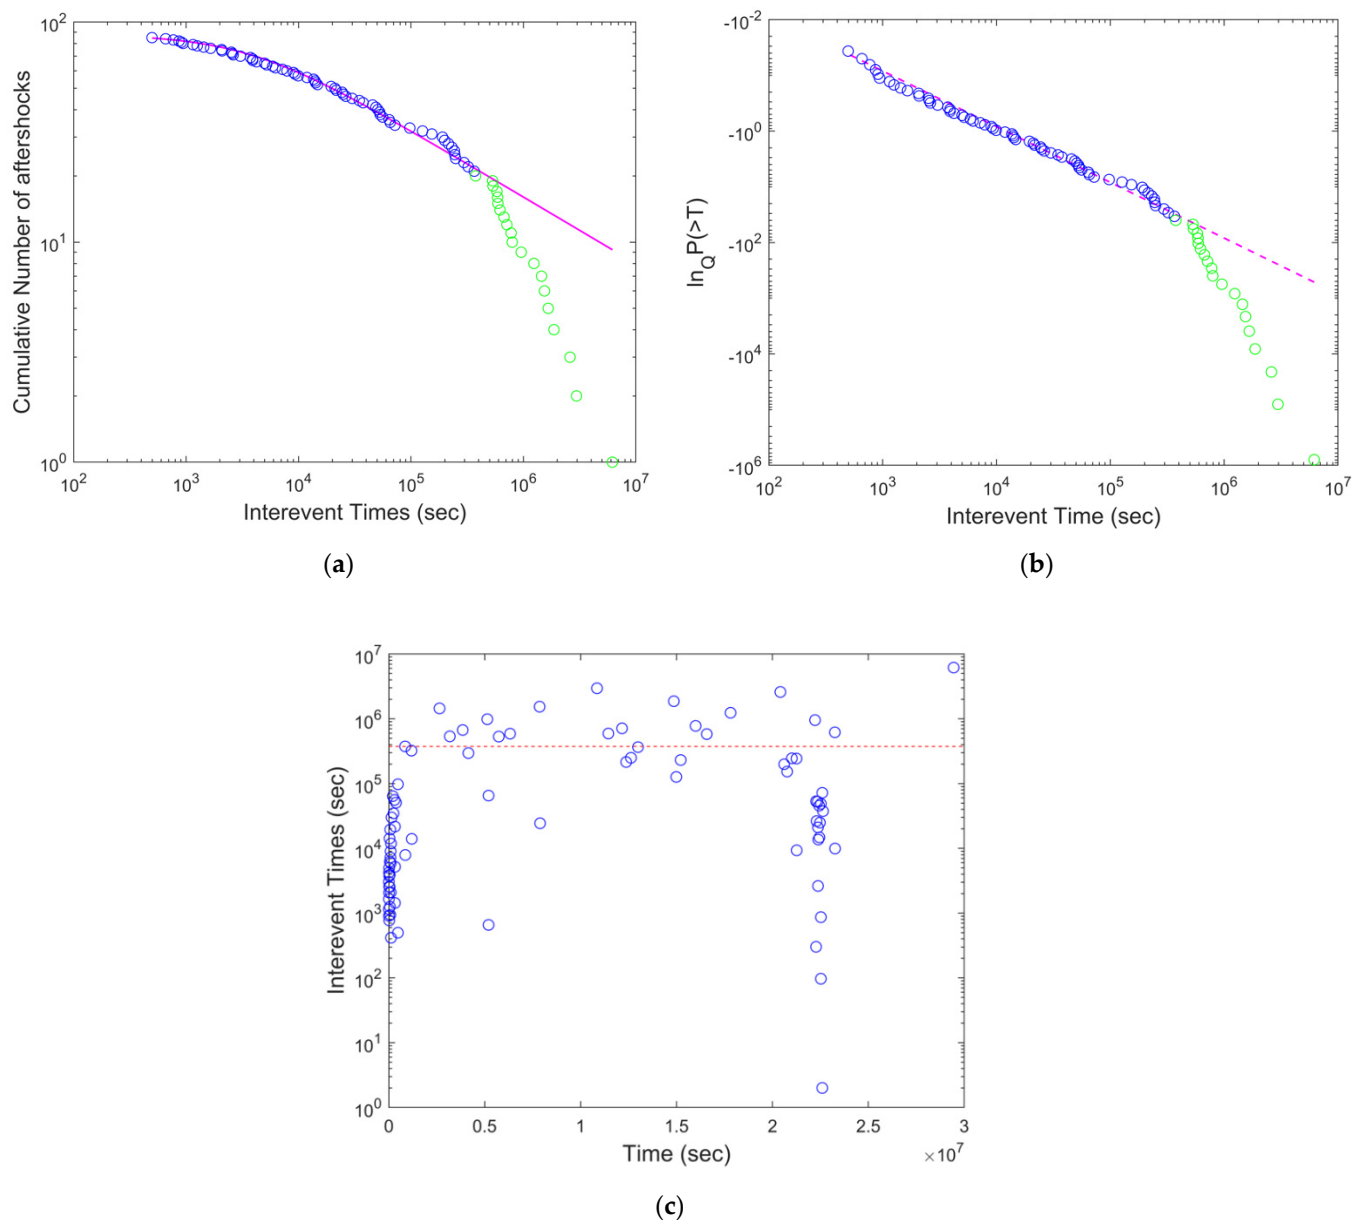

**Figure S5.** (a) The cumulative distribution function of the interevent times of the 1995  $M_w$  7.7 Panguna Earthquake (Papua New Guinea). The magenta line is the Q-exponential function fitting with  $q = 1.77$ . (b) The Q-logarithmic function of  $P(>T)$  as a function of the interevent times, where the dashed line is the fitting with  $q = 1.77$ . The deviation from linearity suggests  $T_c$  values close to  $4 \times 10^5$  s. The correlation coefficient for the Q-logarithmic function up to  $T_c$  is  $R^2 = 0.9609$ . (c) The evolution of the interevent time ( $T$ ) as a function of the time ( $t$ ) since the main event. The  $T$  value is indicated by the red dashed line.

### 6. The 1995 $M_w$ 7.9 Kuril Islands Earthquake (Russia)

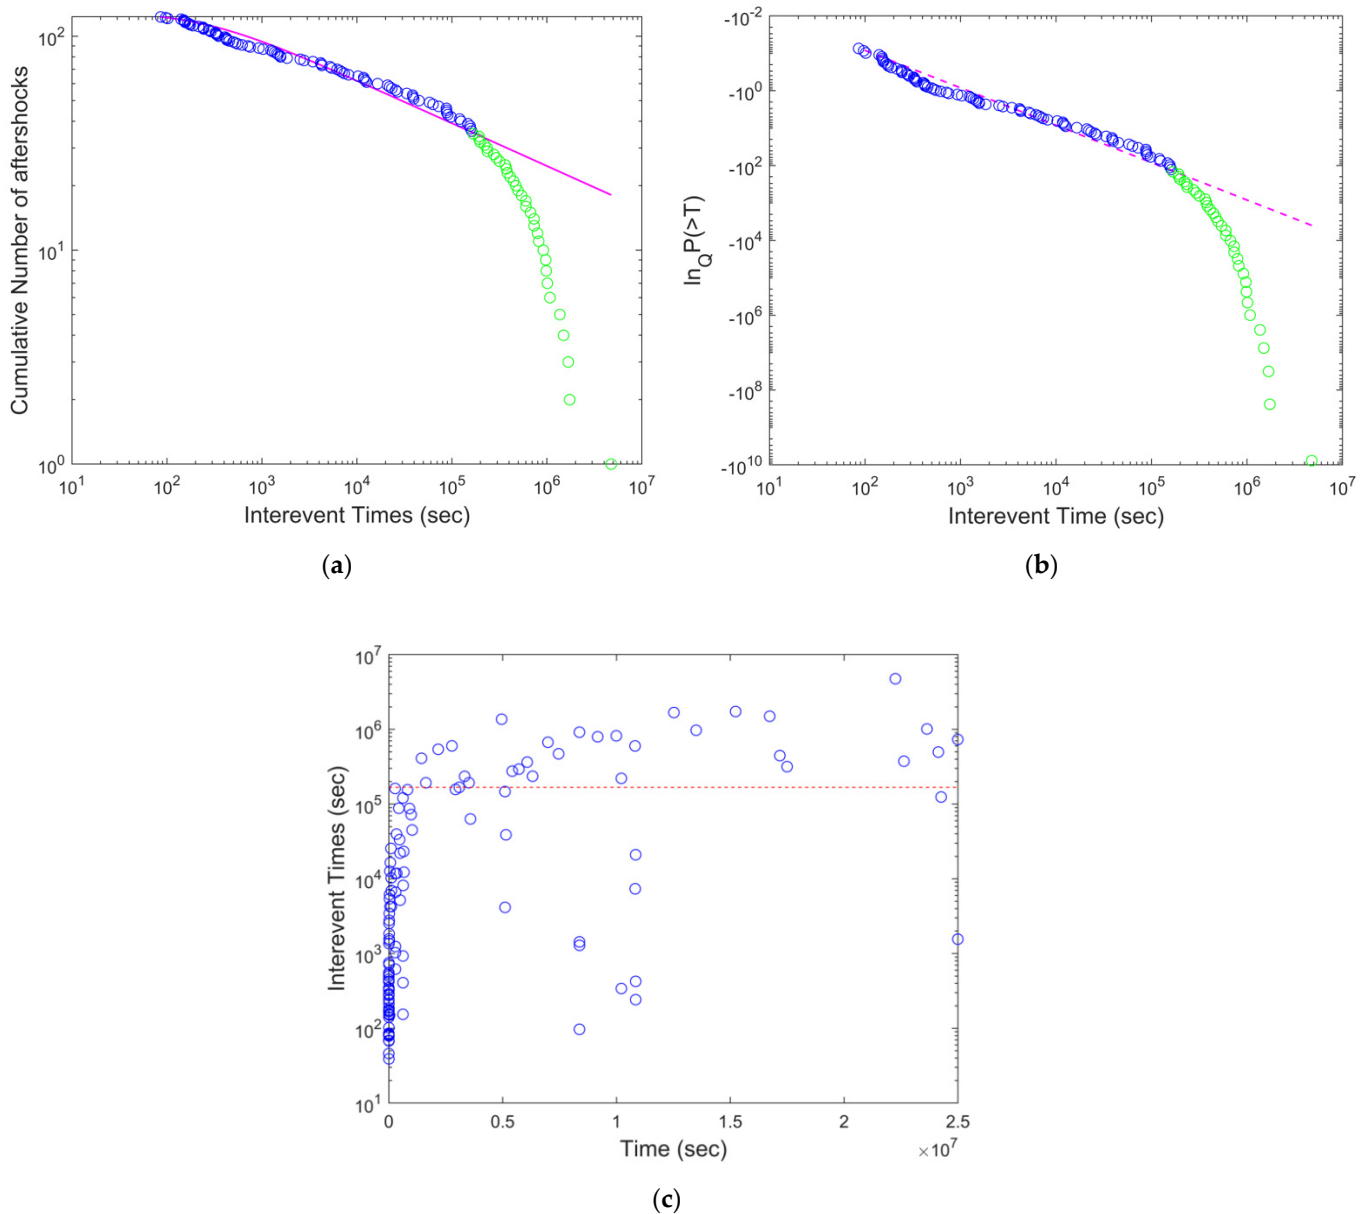

**Figure S6.** (a) The cumulative distribution function of the interevent times of the 1995  $M_w$  7.9 Kuril Islands Earthquake (Russia). The magenta line is the Q-exponential function fitting with  $q = 1.83$ . (b) The Q-logarithmic function of  $P(>T)$  as a function of the interevent times, where the dashed line is the fitting with  $q = 1.83$ . The deviation from linearity suggests  $T_c$  values close to  $2 \times 10^5$  s. The correlation coefficient for the Q-logarithmic function up to  $T_c$  is  $R^2 = 0.9666$ . (c) The evolution of the interevent time ( $T$ ) as a function of the time ( $t$ ) since the main event. The  $T$  value is indicated by the red dashed line.

### 7. The 2000 $M_w$ 7.9 Bengkulu Earthquake (Indonesia)

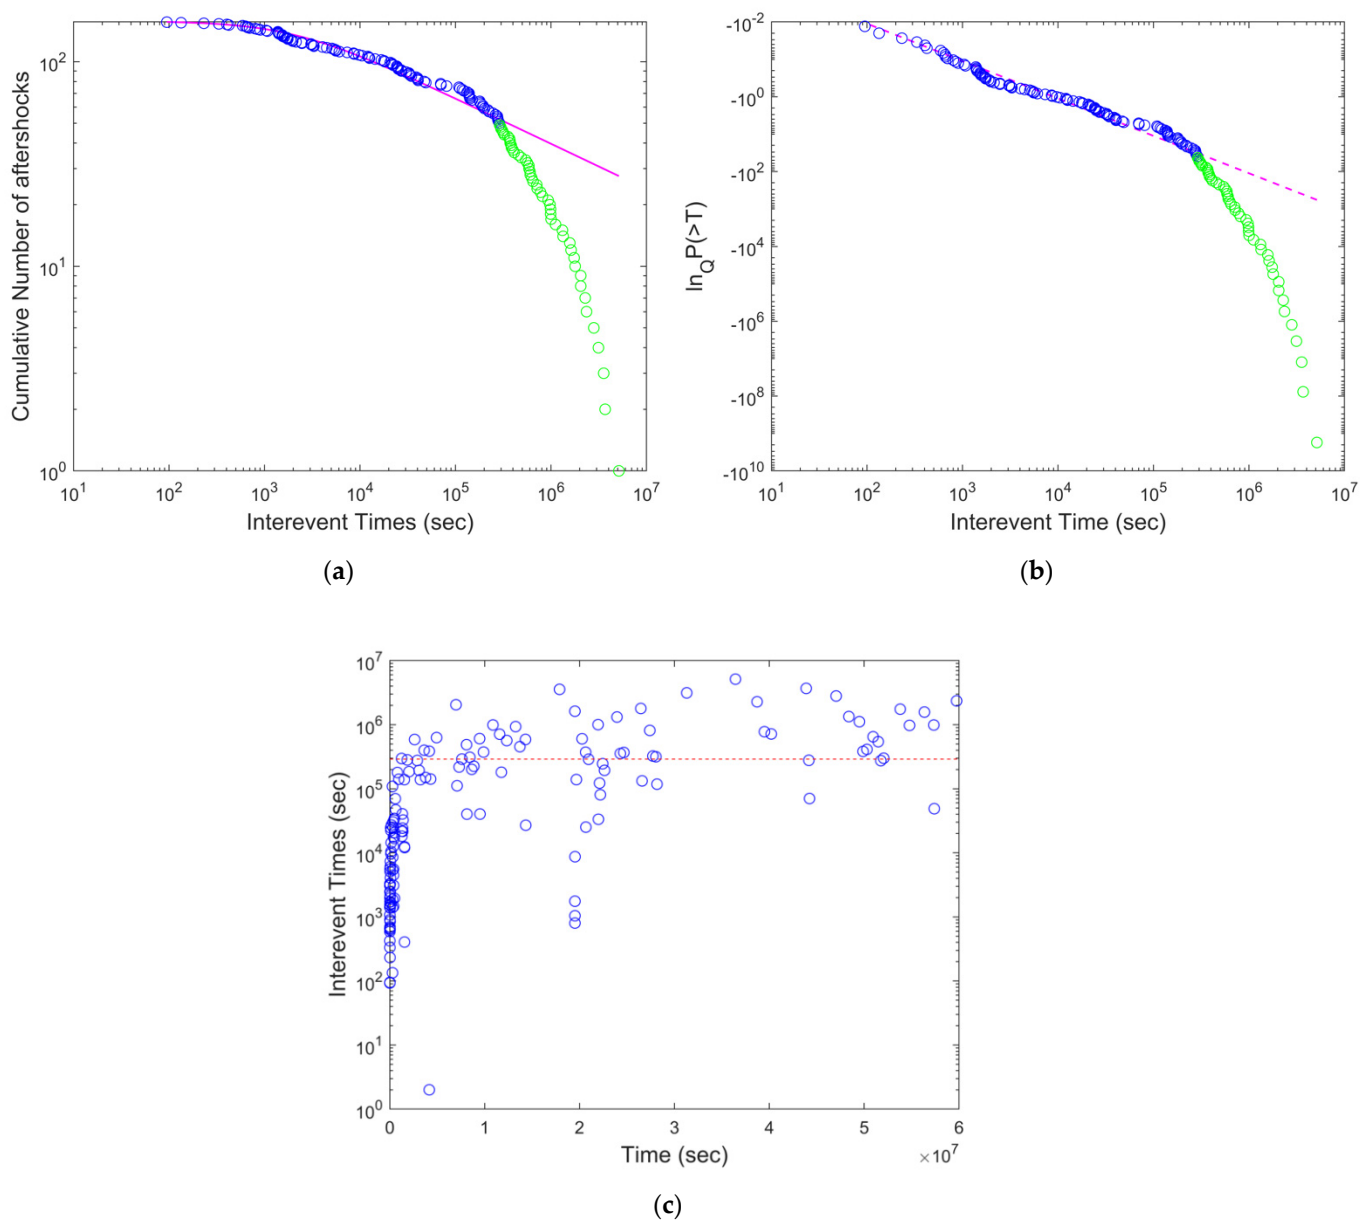

**Figure S7.** (a) The cumulative distribution function of the interevent times for the 2000  $M_w$  7.9 Bengkulu Earthquake (Indonesia). The magenta line is the Q-exponential function fitting with  $q = 1.82$ . (b) The Q-logarithmic function of  $P(>T)$  as a function of the interevent times, where the dashed line is the fitting with  $q = 1.82$ . The deviation from linearity suggests  $T_c$  values close to  $3 \times 10^5$  s. The correlation coefficient for the Q-logarithmic function up to  $T_c$  is  $R^2 = 0.9346$ . (c) The evolution of the interevent time ( $T$ ) as a function of the time ( $t$ ) since the main event. The  $T$  value is indicated by the red dashed line.

### 8. The 2000 $M_w$ 8.0 Rabaul Earthquake (Papa New Guinea)

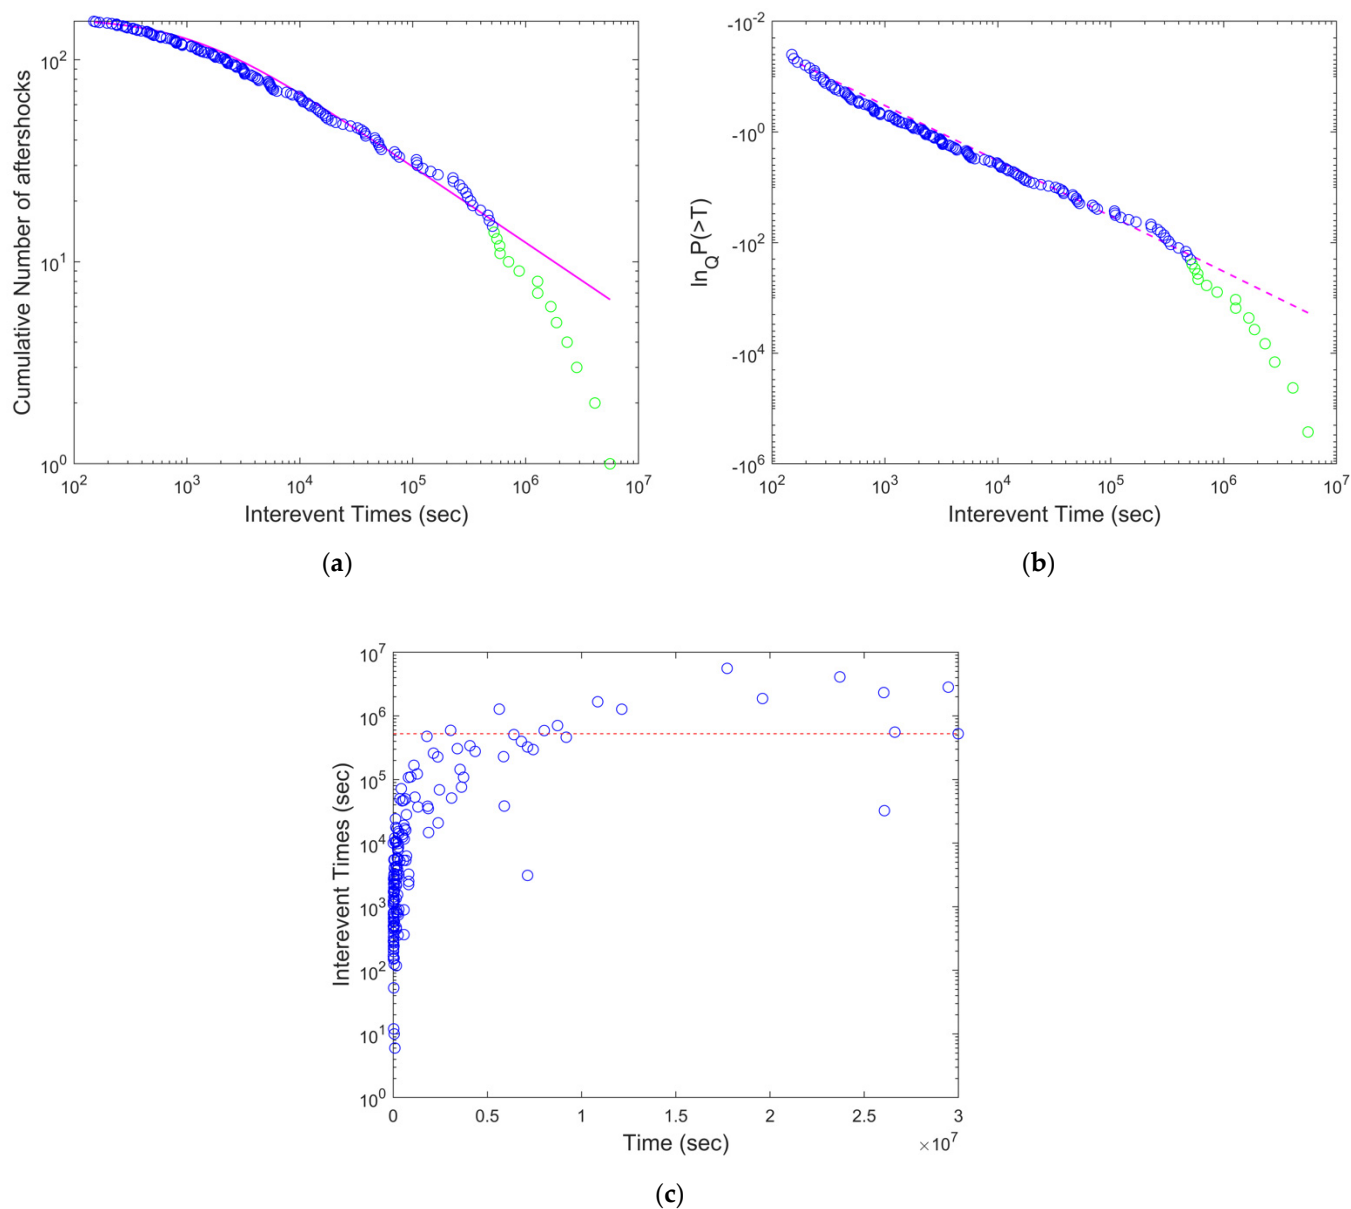

**Figure S8.** (a) The cumulative distribution function of the interevent times for the 2000  $M_w$  8.0 Rabaul Earthquake (Papa New Guinea). The magenta line is the Q-exponential function fitting with  $q = 1.73$ . (b) The Q-logarithmic function of  $P(>T)$  as a function of the interevent times, where the dashed line is the fitting with  $q = 1.73$ . The deviation from linearity suggests  $T_c$  values close to  $5 \times 10^5$  s. The correlation coefficient for the Q-logarithmic function up to  $T_c$  is  $R^2 = 0.9630$ . (c) The evolution of the interevent time ( $T$ ) as a function of the time ( $t$ ) since the main event. The  $T$  value is indicated by the red dashed line.

### 9. The 2001 $M_w$ 8.4 Atico Earthquake (Peru)

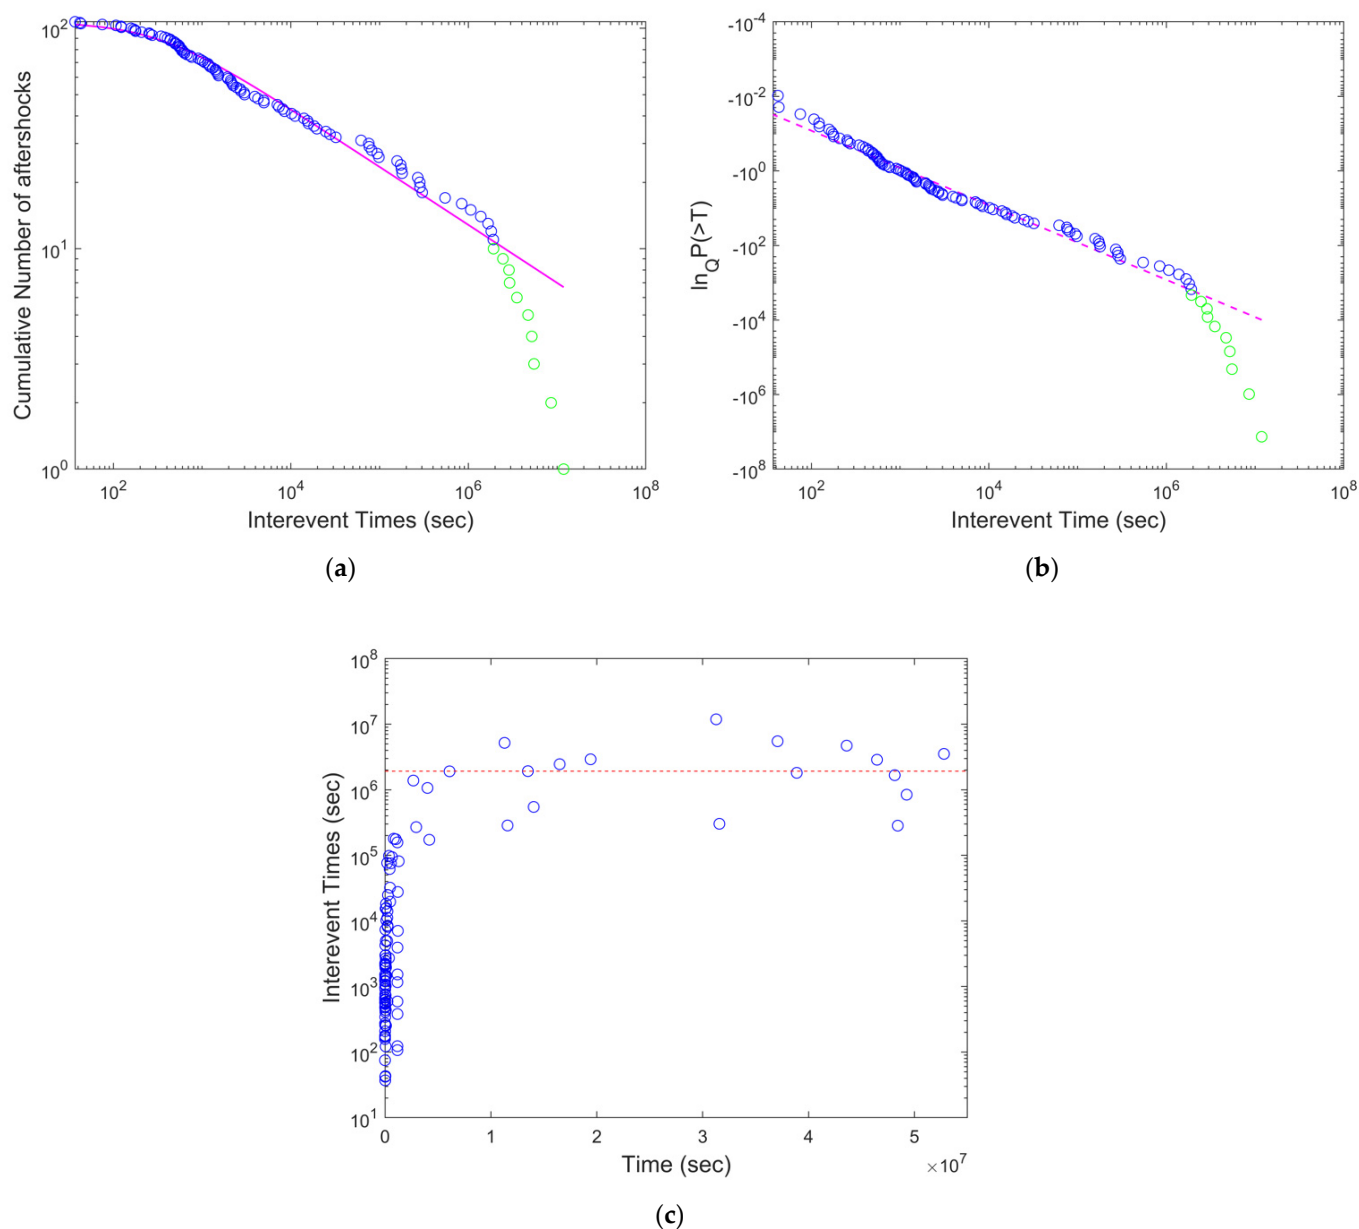

**Figure S9.** (a) The cumulative distribution function of the interevent times for the 2001  $M_w$  8.4 Atico Earthquake (Peru). The magenta line is the Q-exponential function fitting with  $q = 1.79$ . (b) The Q-logarithmic function of  $P(>T)$  as a function of the interevent times, where the dashed line is the fitting with  $q = 1.79$ . The deviation from linearity suggests  $T_c$  values close to  $2 \times 10^6$  s. The correlation coefficient for the Q-logarithmic function up to  $T_c$  is  $R^2 = 0.9400$ . (c) The evolution of the interevent time ( $T$ ) as a function of the time ( $t$ ) since the main event. The  $T$  value is indicated by the red dashed line.

### 10. The 2003 M<sub>w</sub> 8.3 Kashiro Earthquake (Japan)

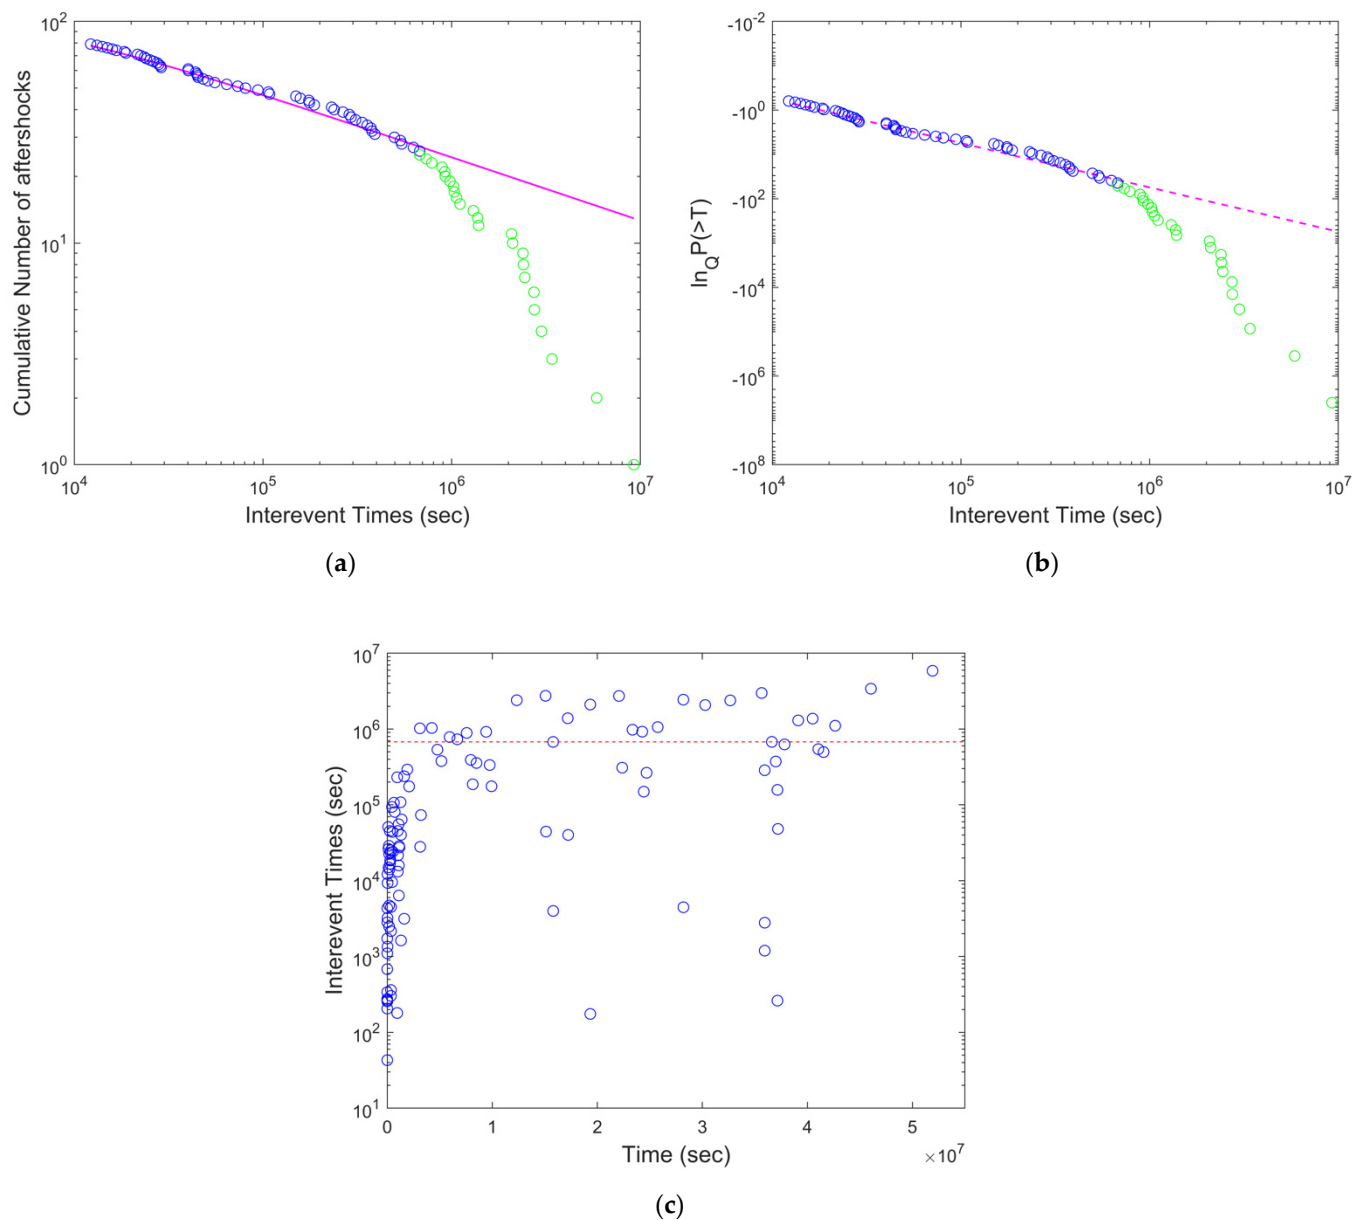

**Figure S10.** (a) The cumulative distribution function of the interevent times for the 2003 M<sub>w</sub> 8.3 Kashiro Earthquake (Japan). The magenta line is the Q-exponential function fitting with  $q = 1.78$ . (b) The Q-logarithmic function of  $P(>T)$  as a function of the interevent times, where the dashed line is the fitting with  $q = 1.78$ . The deviation from linearity suggests  $T_c$  values close to  $6 \times 10^5$  s. The correlation coefficient for the Q-logarithmic function up to  $T_c$  is  $R^2 = 0.9689$ . (c) The evolution of the interevent time ( $T$ ) as a function of the time ( $t$ ) since the main event. The  $T$  value is indicated by the red dashed line.

### 11. The 2004 M<sub>w</sub> 9.1 Sumatra–Andaman Islands Earthquake

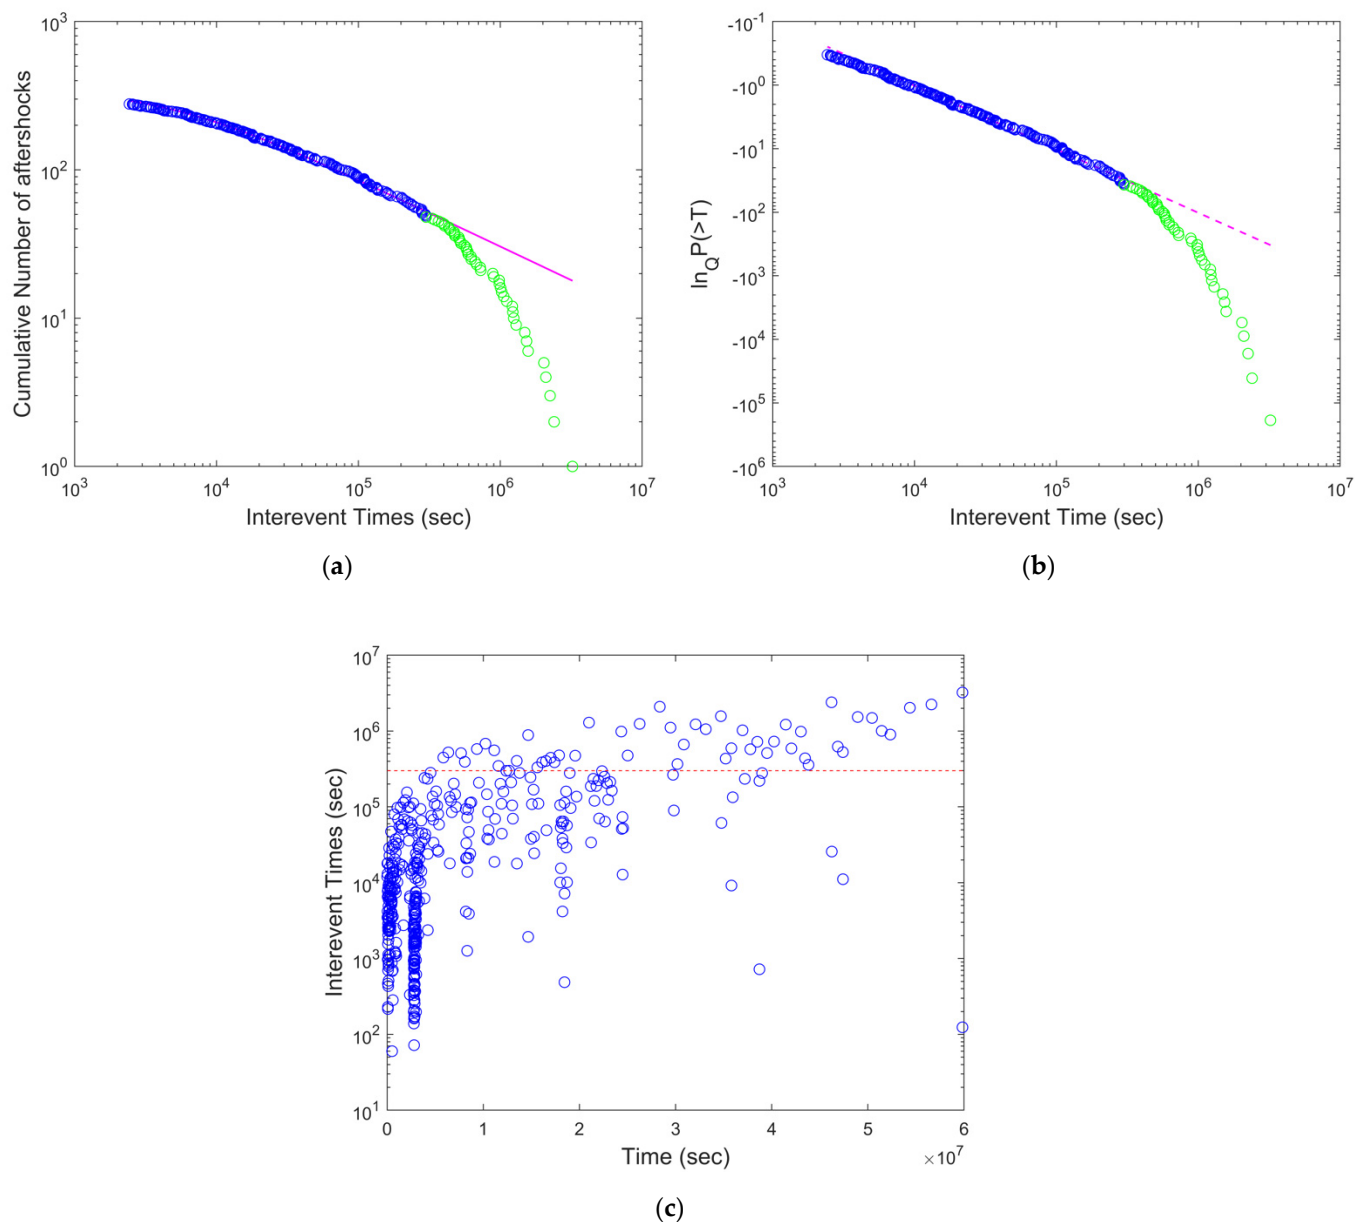

**Figure S11.** (a) The cumulative distribution function of the interevent times for the 2004 M<sub>w</sub> 9.1 Sumatra–Andaman Islands Earthquake. The magenta line is the Q-exponential function fitting with  $q = 1.69$ . (b) The Q-logarithmic function of  $P(>T)$  as a function of the interevent times, where the dashed line is the fitting with  $q = 1.69$ . The deviation from linearity suggests  $T_c$  values close to  $3 \times 10^5$  s. The correlation coefficient for the Q-logarithmic function up to  $T_c$  is  $R^2 = 0.9923$ . (c) The evolution of the interevent time ( $T$ ) as a function of the time ( $t$ ) since the main event. The  $T$  value is indicated by the red dashed line.



## 12. The 2005 M<sub>w</sub> 8.6 Singkil Earthquake (Indonesia)

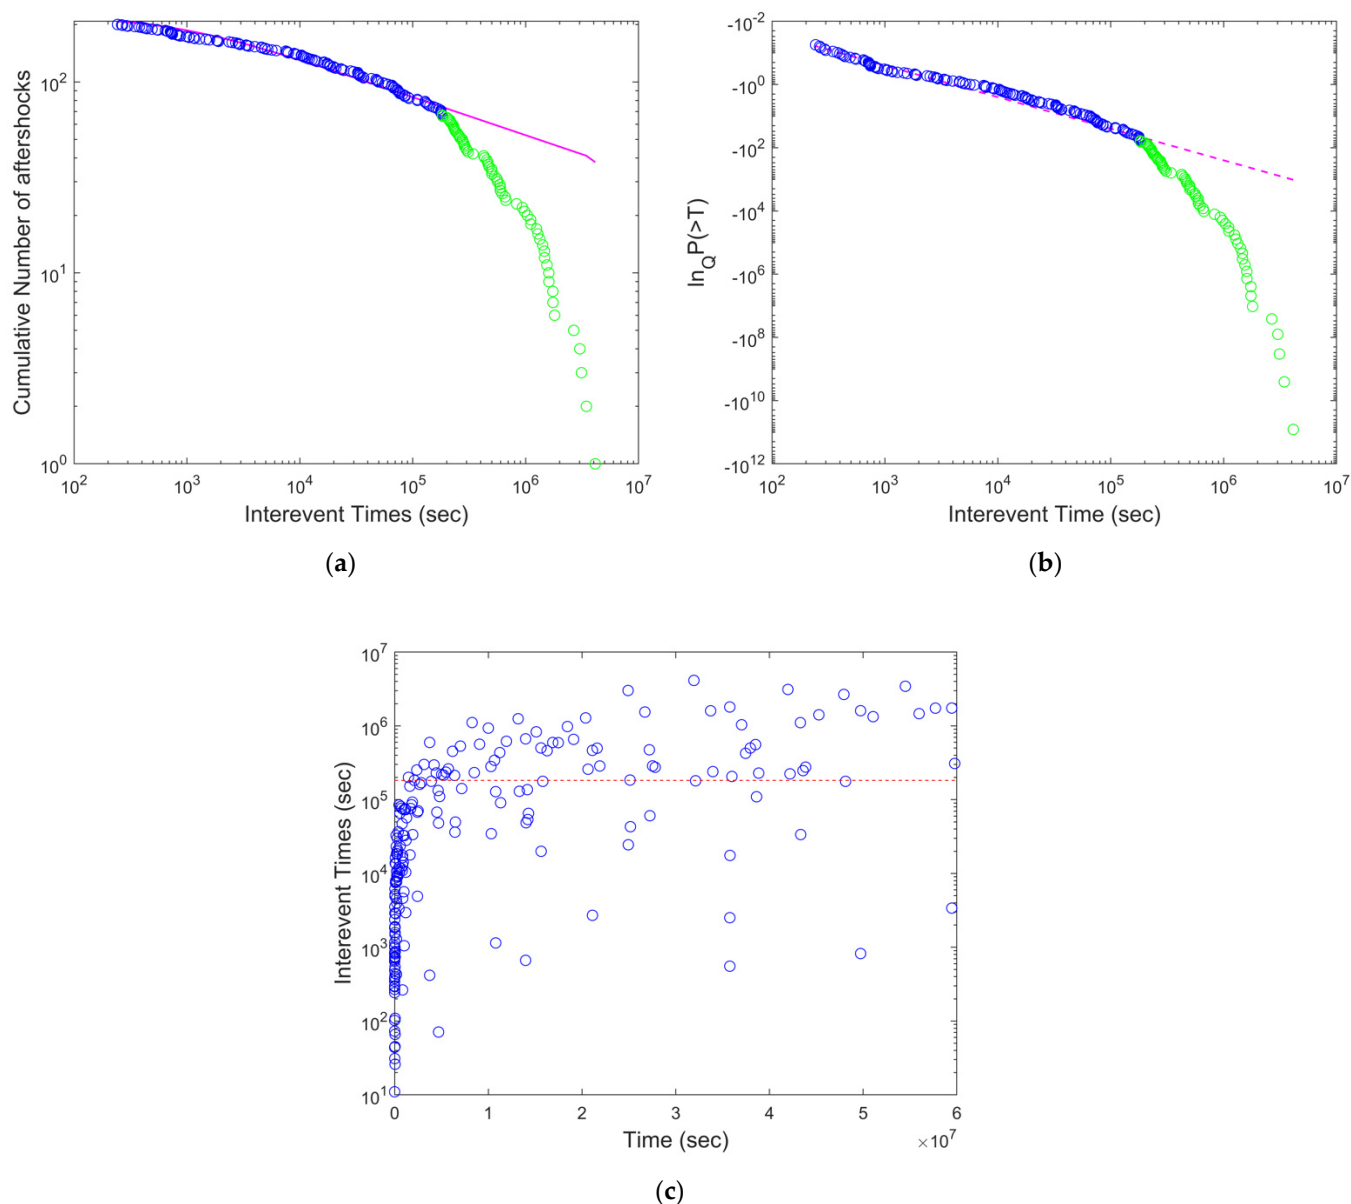

**Figure S12.** (a) The cumulative distribution function of the interevent times for the 2005 M<sub>w</sub> 8.6 Singkil Earthquake (Indonesia). The magenta line is the Q-exponential function fitting with  $q = 1.83$ . (b) The Q-logarithmic function of  $P(>T)$  as a function of the interevent times, where the dashed line is the fitting with  $q = 1.83$ . The deviation from linearity suggests  $T_c$  values close to  $2 \times 10^5$  s. The correlation coefficient for the Q-logarithmic function up to  $T_c$  is  $R^2 = 0.9622$ . (c) The evolution of the interevent time ( $T$ ) as a function of the time ( $t$ ) since the main event. The  $T$  value is indicated by the red dashed line.

### 13. The 2006 $M_w$ 8.0 Pangai Earthquake (Tonga)

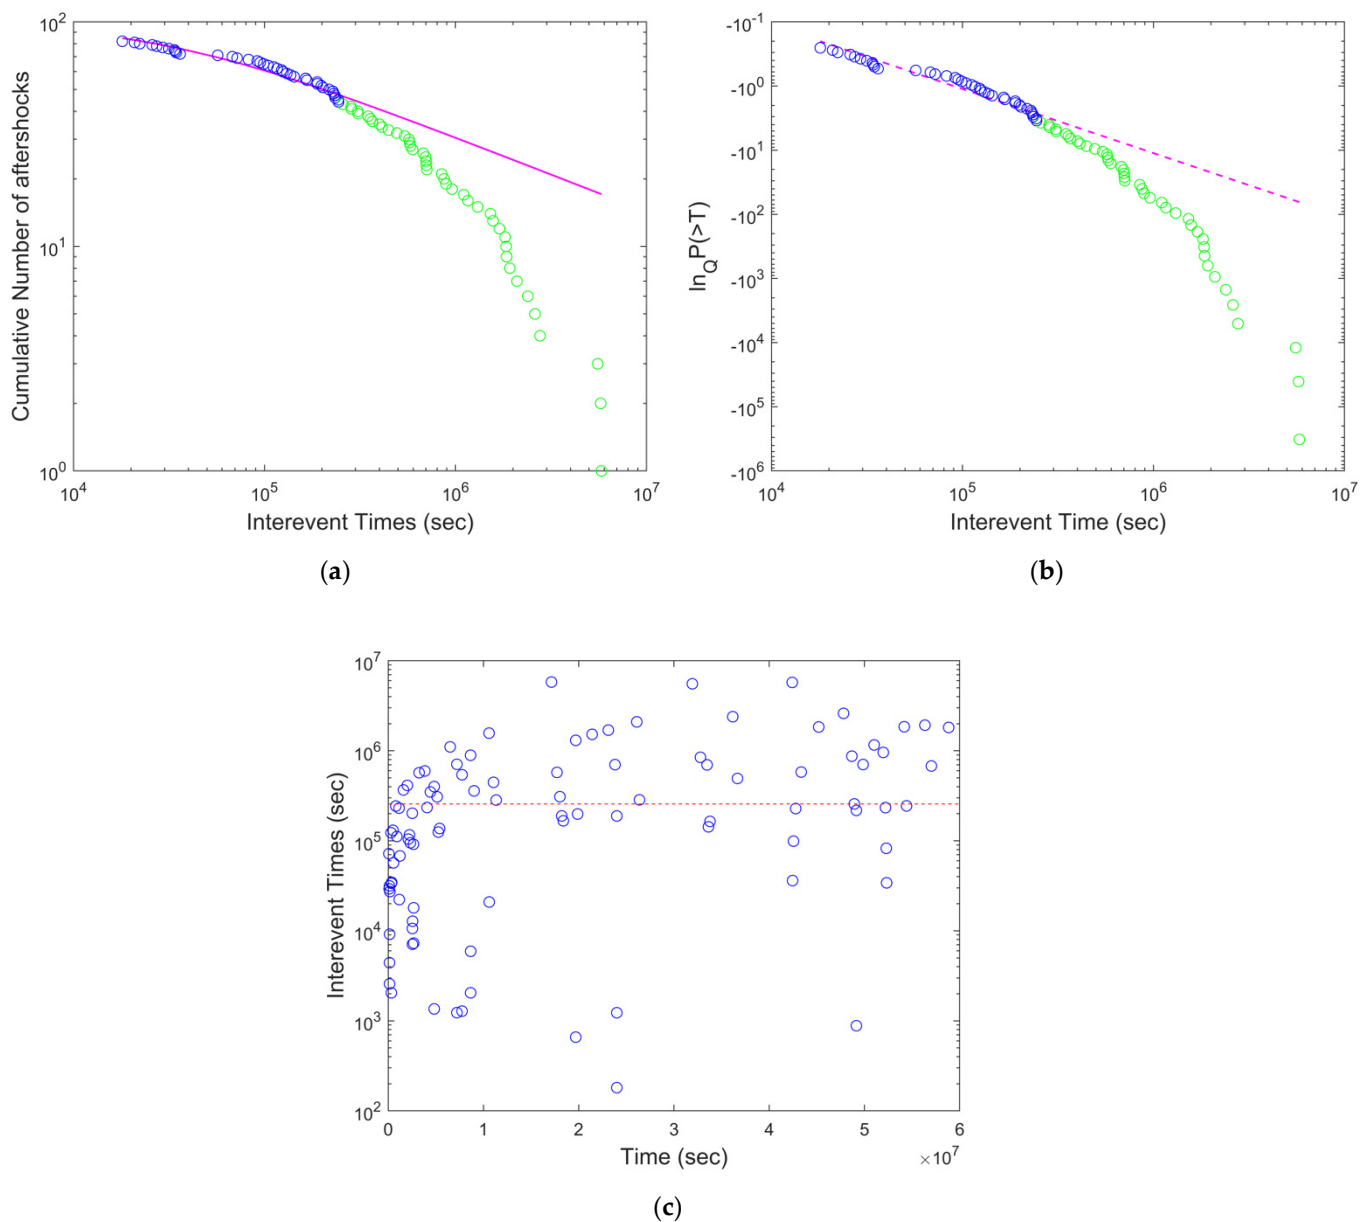

**Figure S13.** (a) The cumulative distribution function of the interevent times for the 2006  $M_w$  8.0 Pangai Earthquake (Tonga). The magenta line is the Q-exponential function fitting with  $q = 1.75$ . (b) The Q-logarithmic function of  $P(>T)$  as a function of the interevent times, where the dashed line is the fitting with  $q = 1.75$ . The deviation from linearity suggests  $T_c$  values close to  $3 \times 10^5$  s. The correlation coefficient for the Q-logarithmic function up to  $T_c$  is  $R^2 = 0.9494$ . (c) The evolution of the interevent time ( $T$ ) as a function of the time ( $t$ ) since the main event. The  $T$  value is indicated by the red dashed line.

#### 14. The 2006 $M_w$ 7.7 Singaparna Earthquake (Indonesia)

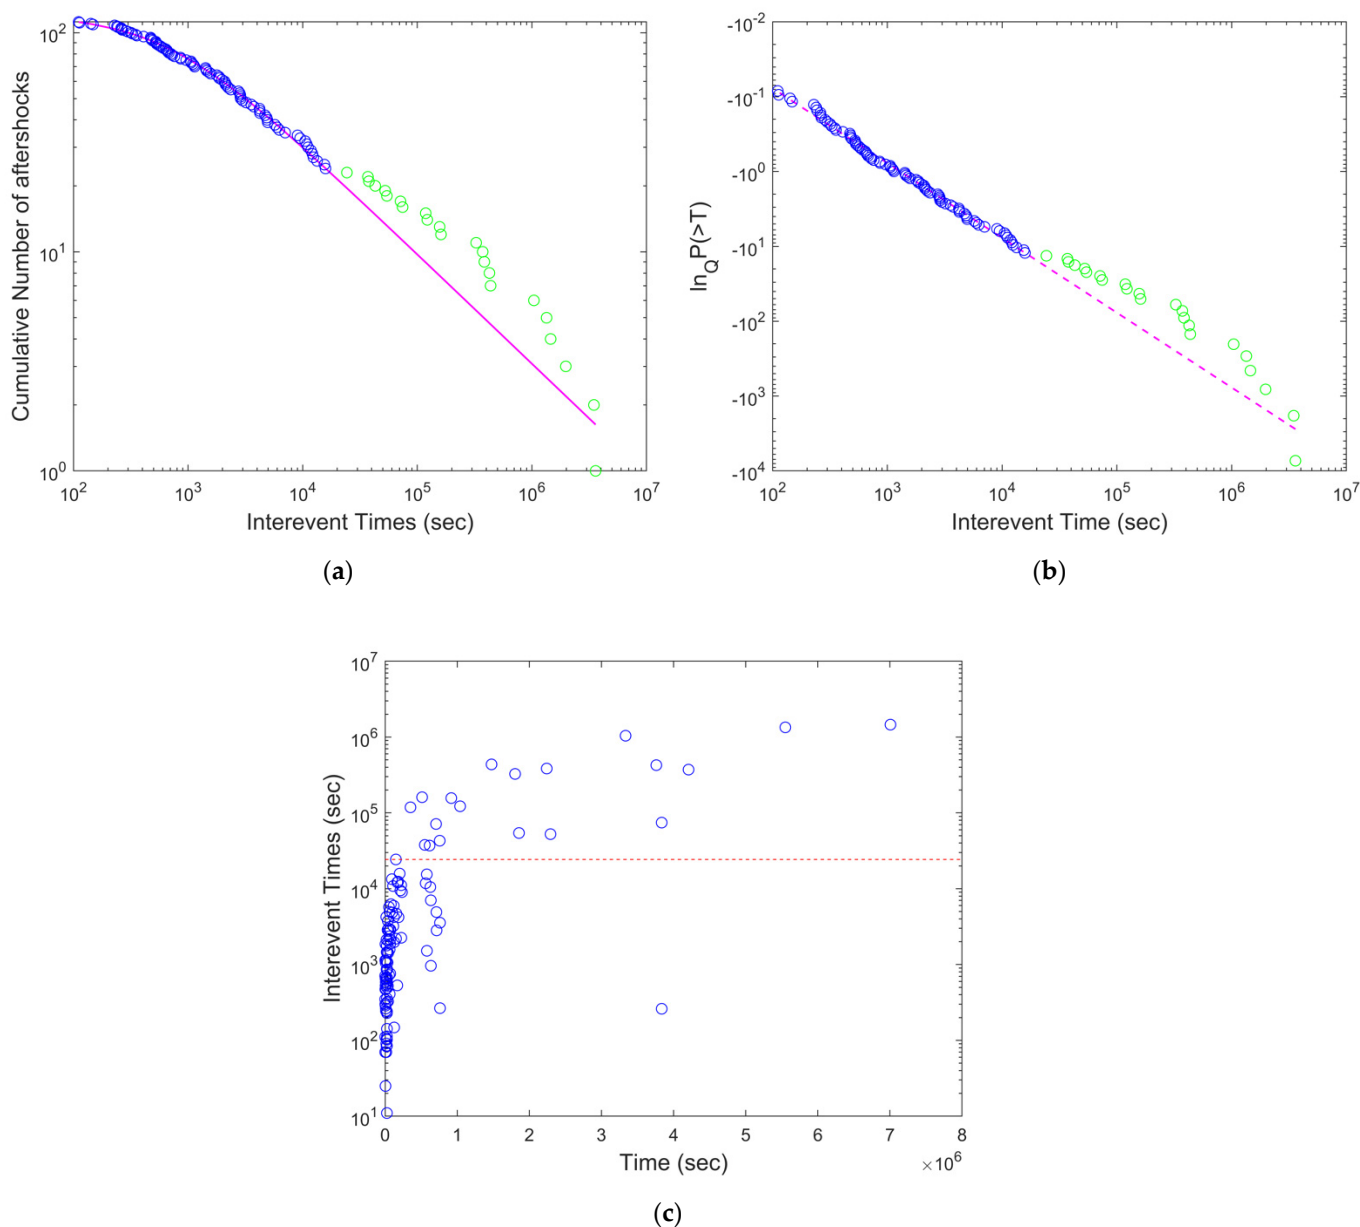

**Figure S14.** (a) The cumulative distribution function of the interevent times for the 2006  $M_w$  7.7 Singaparna Earthquake (Indonesia). The magenta line is the Q-exponential function fitting with  $q = 1.67$ . (b) The Q-logarithmic function of  $P(>T)$  as a function of the interevent times, where the dashed line is the fitting with  $q = 1.67$ . The deviation from linearity suggests  $T_c$  values close to  $2 \times 10^4$  s. The correlation coefficient for the Q-logarithmic function up to  $T_c$  is  $R^2 = 0.9909$ . (c) The evolution of the interevent time ( $T$ ) as a function of the time ( $t$ ) since the main event. The  $T$  value is indicated by the red dashed line.

### 15. The 2007 $M_w$ 8.1 Gizo Earthquake (Solomon Islands)

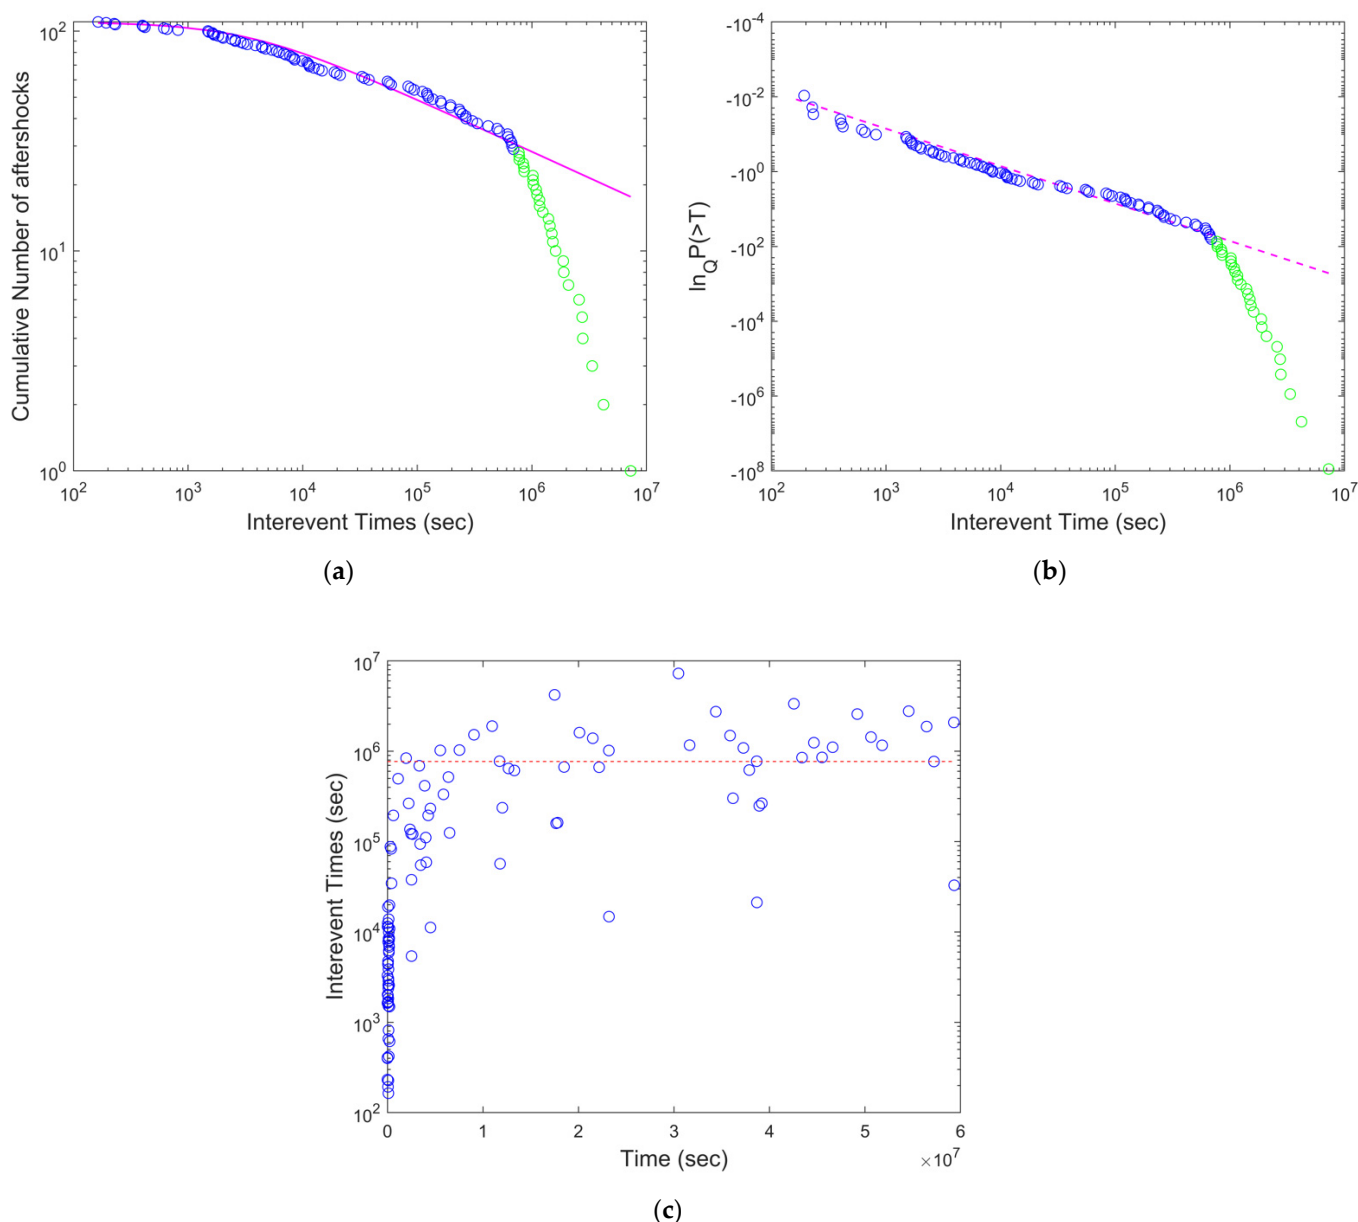

**Figure S15.** (a) The cumulative distribution function of the interevent times for the 2007  $M_w$  8.1 Gizo Earthquake (Solomon Islands). The magenta line is the Q-exponential function fitting with  $q = 1.81$ . (b) The Q-logarithmic function of  $P(>T)$  as a function of the interevent times, where the dashed line is the fitting with  $q = 1.81$ . The deviation from linearity suggests  $T_c$  values close to  $8 \times 10^5$  s. The correlation coefficient for the Q-logarithmic function up to  $T_c$  is  $R^2 = 0.9433$ . (c) The evolution of the interevent time ( $T$ ) as a function of the time ( $t$ ) since the main event. The  $T$  value is indicated by the red dashed line.

### 16. The 2007 $M_w$ 8.5 Bengkulu Earthquake (Indonesia)

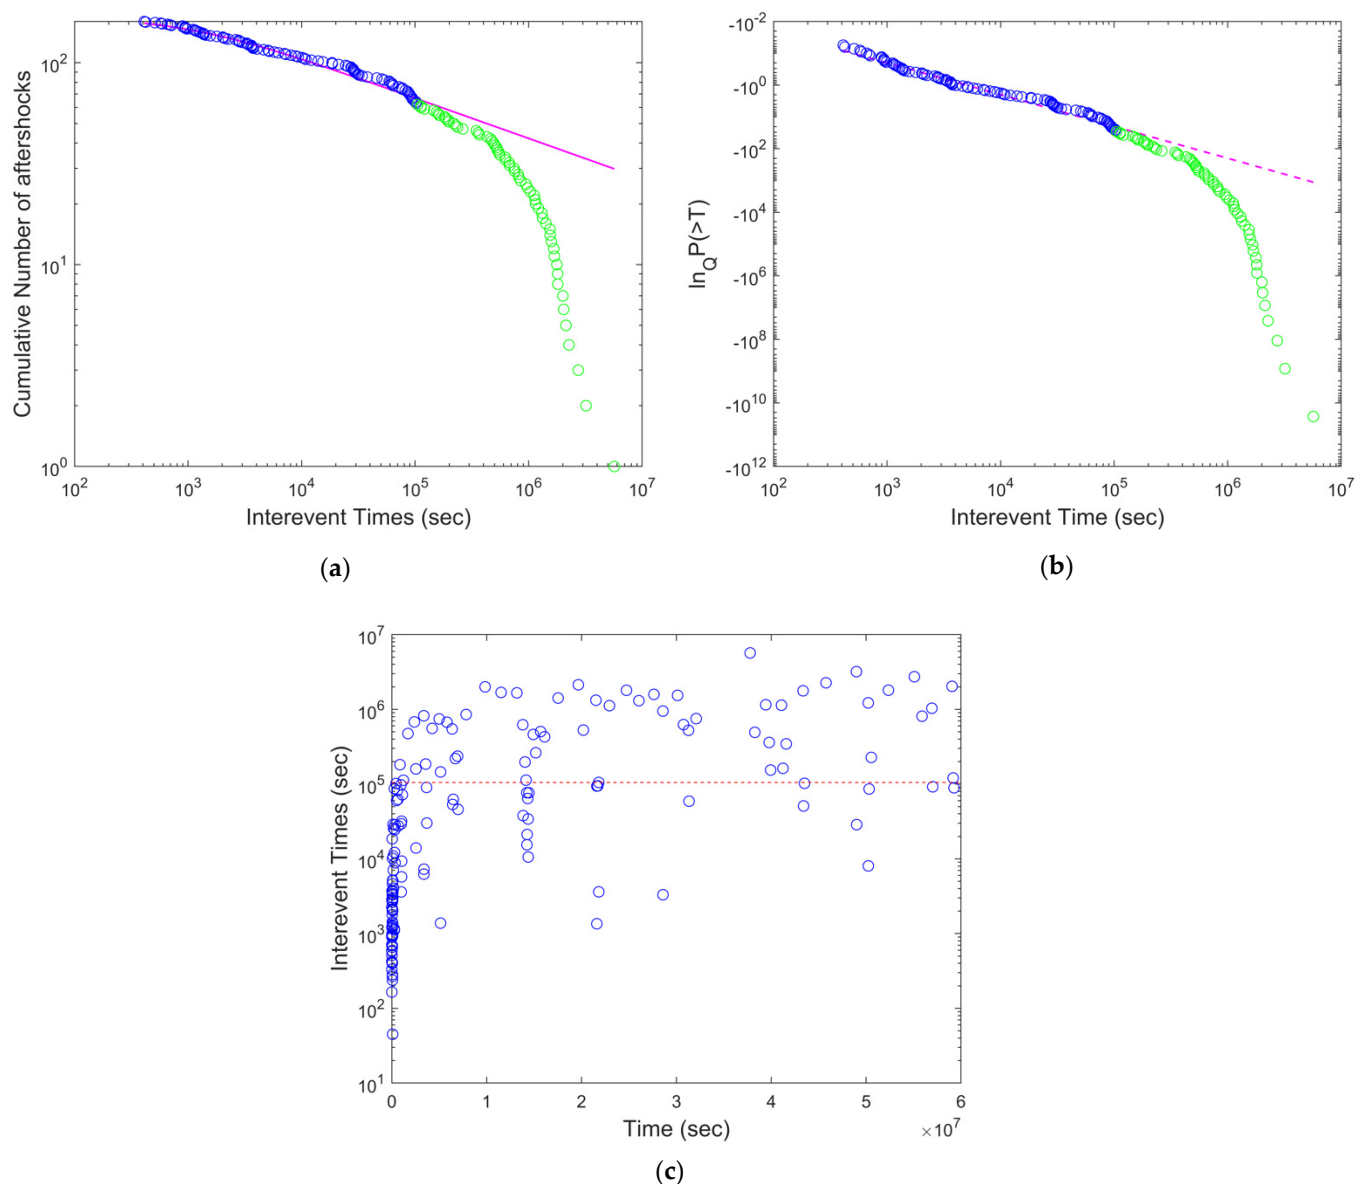

**Figure S16.** (a) The cumulative distribution function of the interevent times for the 2007  $M_w$  8.5 Bengkulu Earthquake (Indonesia). The magenta line is the Q-exponential function fitting with  $q = 1.83$ . (b) The Q-logarithmic function of  $P(>T)$  as a function of the interevent times, where the dashed line is the fitting with  $q = 1.83$ . The deviation from linearity suggests  $T_c$  values close to  $1 \times 10^5$  s. The correlation coefficient for the Q-logarithmic function up to  $T_c$  is  $R^2 = 0.9305$ . (c) The evolution of the interevent time ( $T$ ) as a function of the time ( $t$ ) since the main event. The  $T$  value is indicated by the red dashed line.

### 17. The 2009 $M_w$ 7.2 Sarangani Earthquake (Philippines)

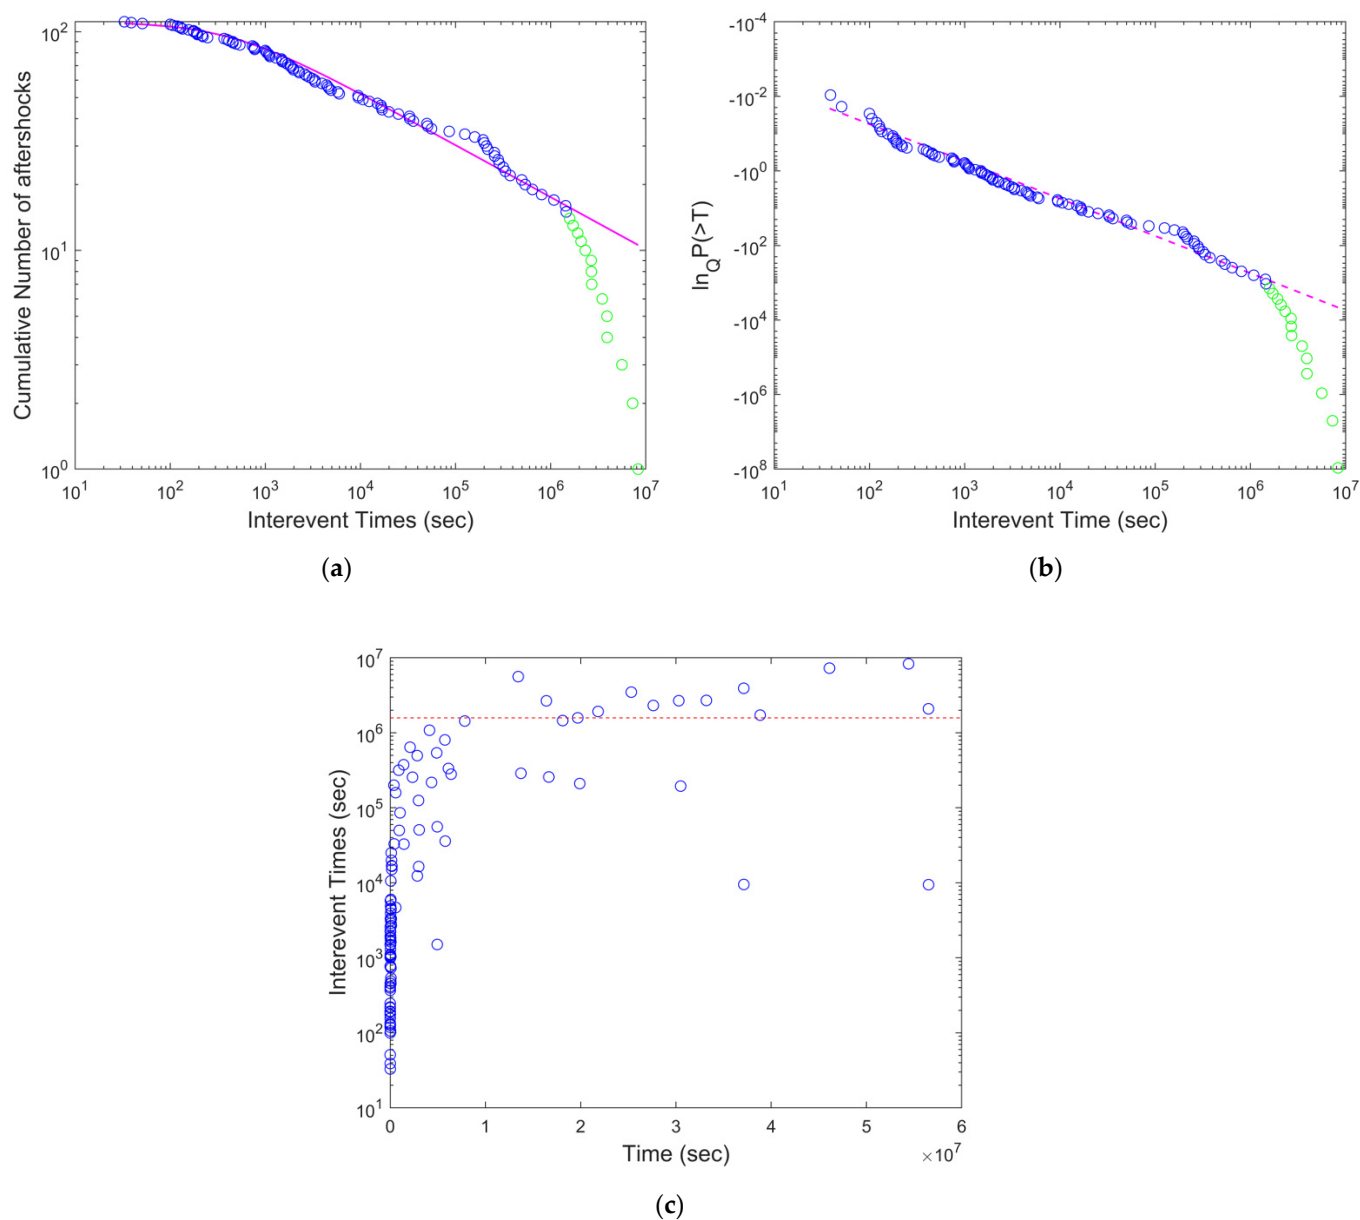

**Figure S17.** (a) The cumulative distribution function of the interevent times for the 2009  $M_w$  7.2 Sarangani Earthquake (Philippines). The magenta line is the Q-exponential function fitting with  $q = 1.81$ . (b) The Q-logarithmic function of  $P(>T)$  as a function of the interevent times, where the dashed line is the fitting with  $q = 1.81$ . The deviation from linearity suggests  $T_c$  values close to  $2 \times 10^6$  s. The correlation coefficient for the Q-logarithmic function up to  $T_c$  is  $R^2 = 0.9694$ . (c) The evolution of the interevent time ( $T$ ) as a function of the time ( $t$ ) since the main event. The  $T$  value is indicated by the red dashed line.

### 18. The 2009 M<sub>w</sub> 8.1 Matavai Earthquake (Samoa)

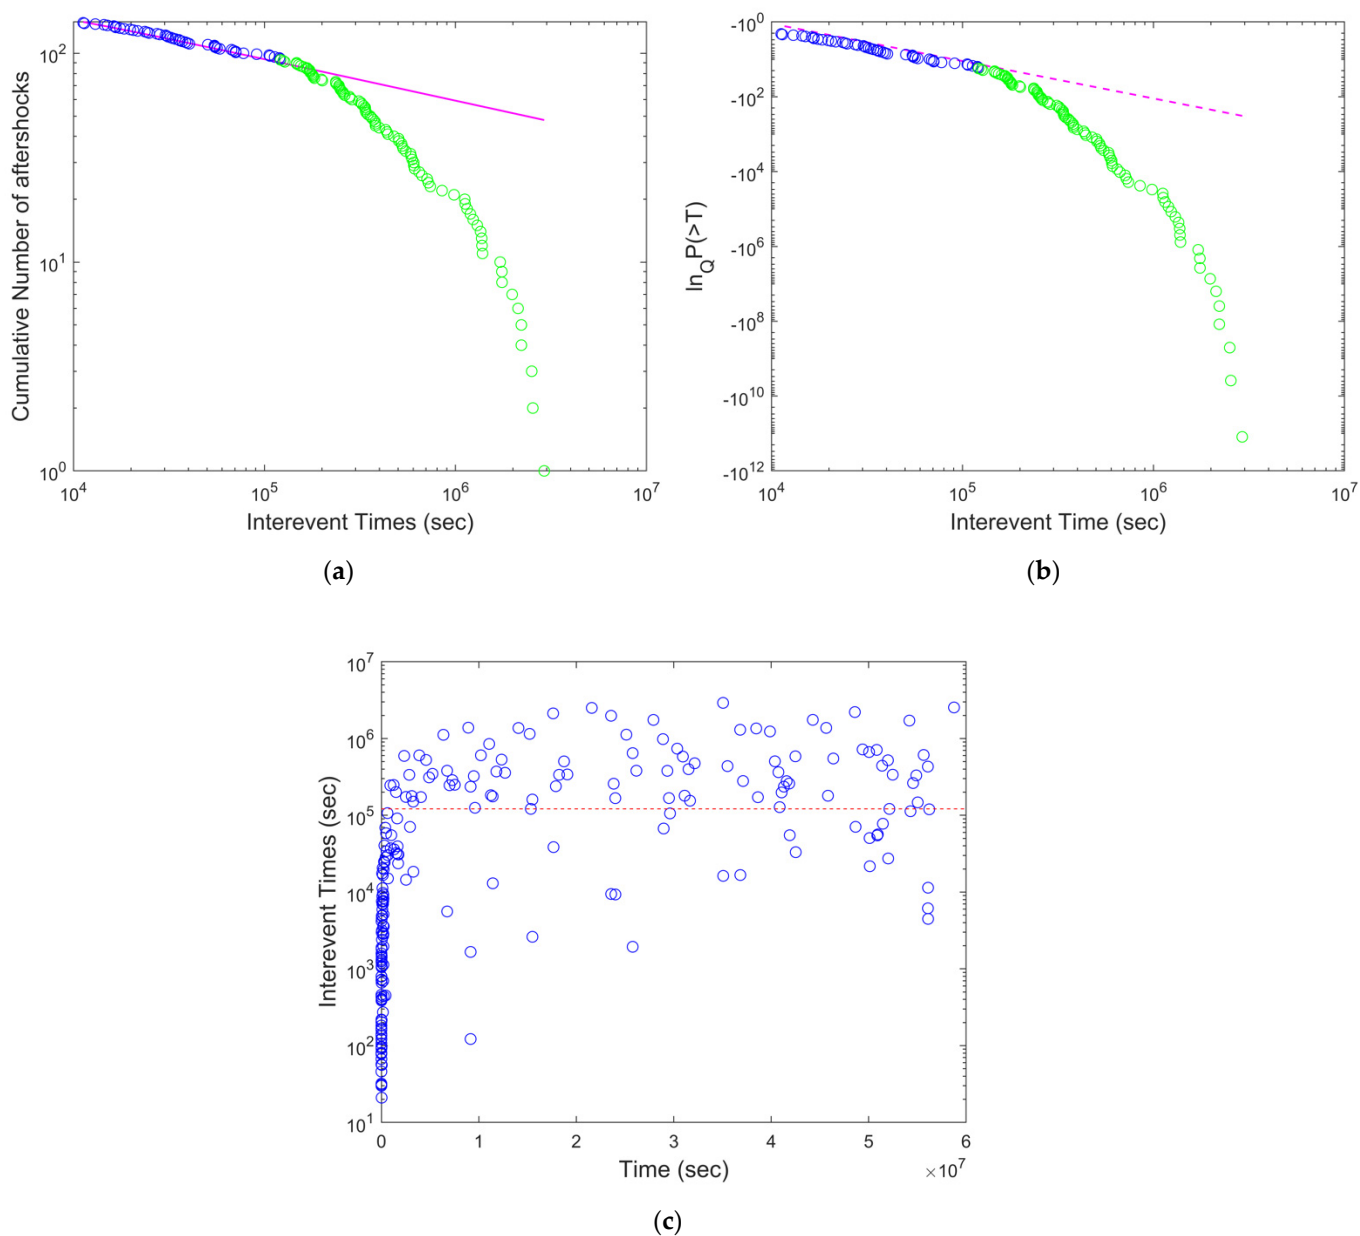

**Figure S18.** (a) The cumulative distribution function of the interevent times for the 2009 M<sub>w</sub> 8.1 Matavai Earthquake (Samoa). The magenta line is the Q-exponential function fitting with  $q = 1.83$ . (b) The Q-logarithmic function of  $P(>T)$  as a function of the interevent times, where the dashed line is the fitting with  $q = 1.83$ . The deviation from linearity suggests  $T_c$  values close to  $1 \times 10^5$  s. The correlation coefficient for the Q-logarithmic function up to  $T_c$  is  $R^2 = 0.9897$ . (c) The evolution of the interevent time ( $T$ ) as a function of the time ( $t$ ) since the main event. The  $T$  value is indicated by the red dashed line.

### 19. The 2009 $M_w$ 7.8 Sola Earthquake (Vanuatu)

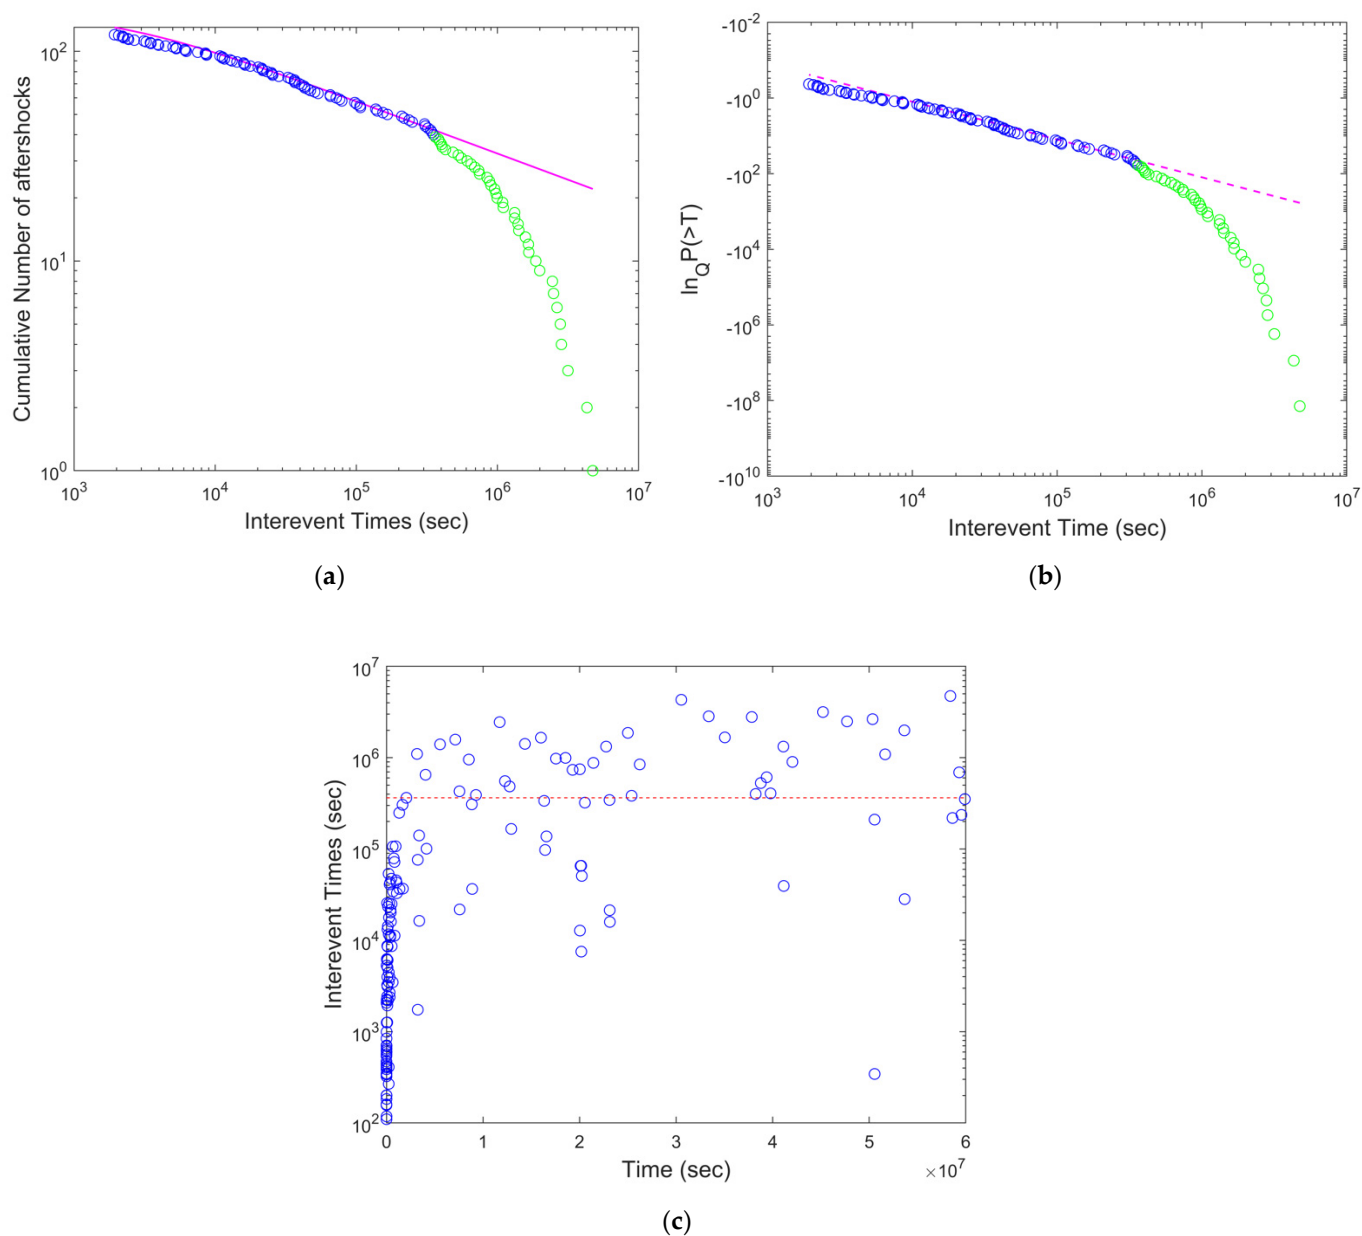

**Figure S19.** (a) The cumulative distribution function of the interevent times for the 2009  $M_w$  7.8 Sola Earthquake (Vanuatu). The magenta line is the Q-exponential function fitting with  $q = 1.80$ . (b) The Q-logarithmic function of  $P(>T)$  as a function of the interevent times, where the dashed line is the fitting with  $q = 1.80$ . The deviation from linearity suggests  $T_c$  values close to  $4 \times 10^5$  s. The correlation coefficient for the Q-logarithmic function up to  $T_c$  is  $R^2 = 0.9864$ . (c) The evolution of the interevent time ( $T$ ) as a function of the time ( $t$ ) since the main event. The  $T$  value is indicated by the red dashed line.



## 20. The 2010 $M_w$ 8.8 Quirihue Earthquake (Chile)

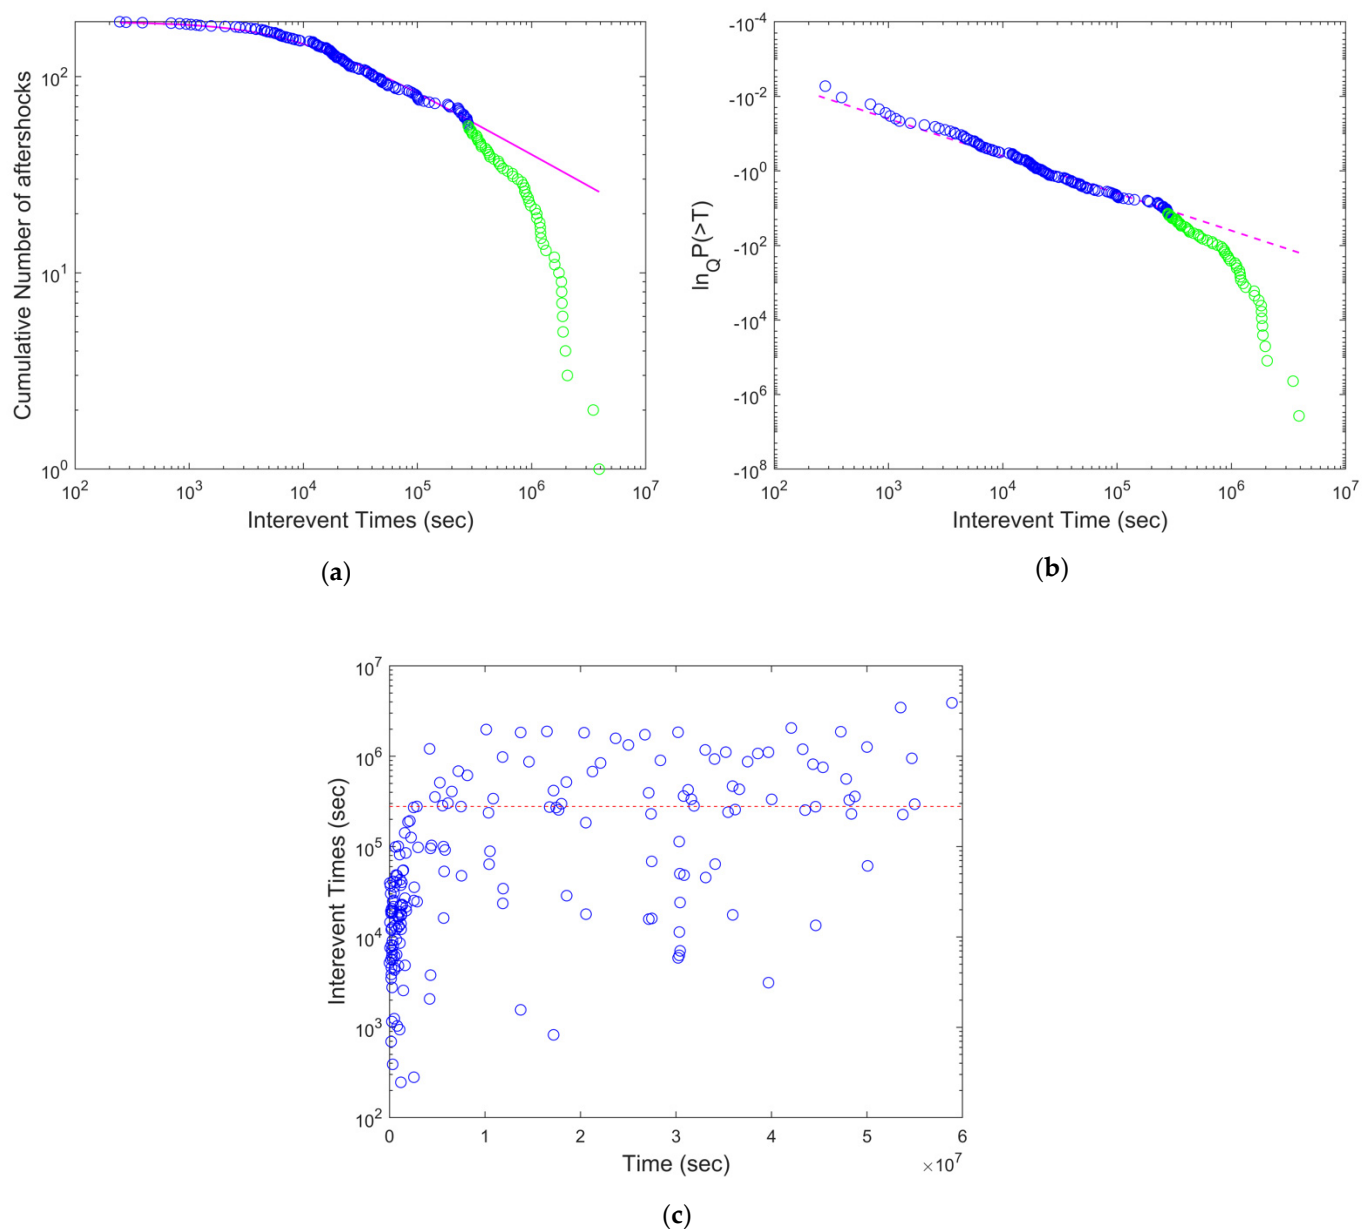

**Figure S20.** (a) The cumulative distribution function of the interevent times for the 2010  $M_w$  8.8 Quirihue Earthquake (Chile). The magenta line is the Q-exponential function fitting with  $q = 1.76$ . (b) The Q-logarithmic function of  $P(>T)$  as a function of the interevent times, where the dashed line is the fitting with  $q = 1.76$ . The deviation from linearity suggests  $T_c$  values close to  $3 \times 10^5$  s. The correlation coefficient for the Q-logarithmic function up to  $T_c$  is  $R^2 = 0.9726$ . (c) The evolution of the interevent time ( $T$ ) as a function of the time ( $t$ ) since the main event. The  $T$  value is indicated by the red dashed line.

## 21. The 2011 $M_w$ 9.1 Great Tohoku (Japan) Earthquake

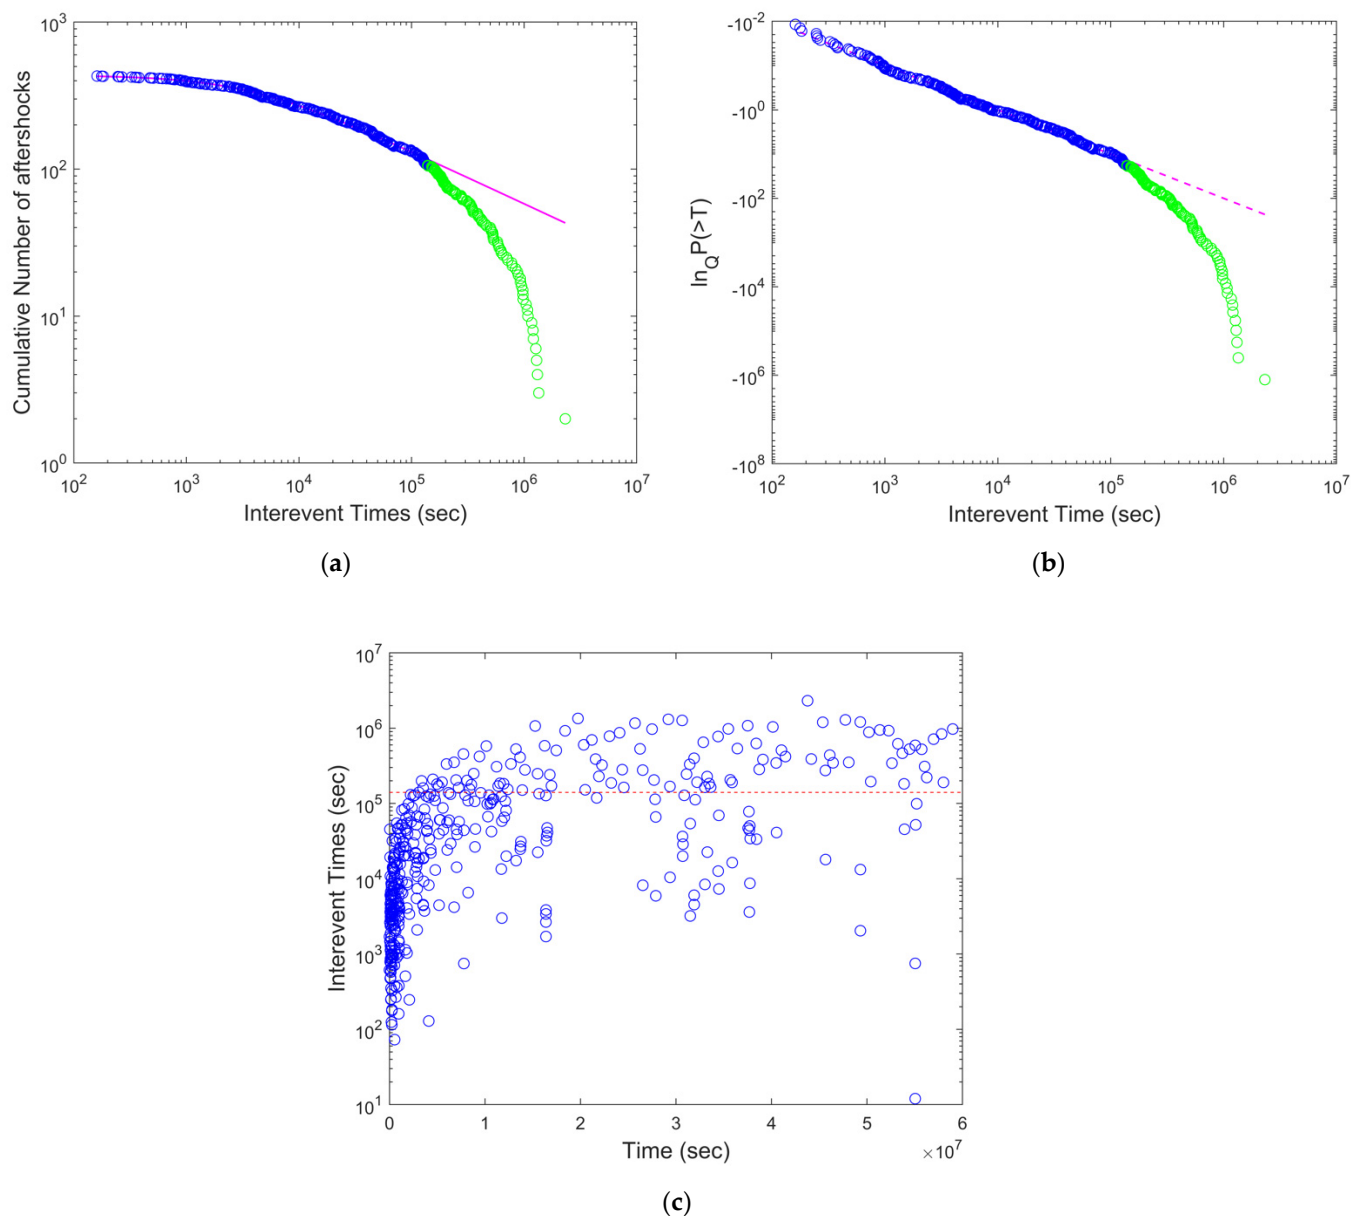

**Figure S21.** (a) The cumulative distribution function of the interevent times for the 2011  $M_w$  9.1 Great Tohoku (Japan) Earthquake. The magenta line is the Q-exponential function fitting with  $q = 1.74$ . (b) The Q-logarithmic function of  $P(>T)$  as a function of the interevent times, where the dashed line is the fitting with  $q = 1.74$ . The deviation from linearity suggests  $T_c$  values close to  $1 \times 10^5$  s. The correlation coefficient for the Q-logarithmic function up to  $T_c$  is  $R^2 = 0.9828$ . (c) The evolution of the interevent time ( $T$ ) as a function of the time ( $t$ ) since the main event. The  $T$  value is indicated by the red dashed line.

## 22. The 2011 $M_w$ 7.6 Kermadec Earthquake (New Zealand)

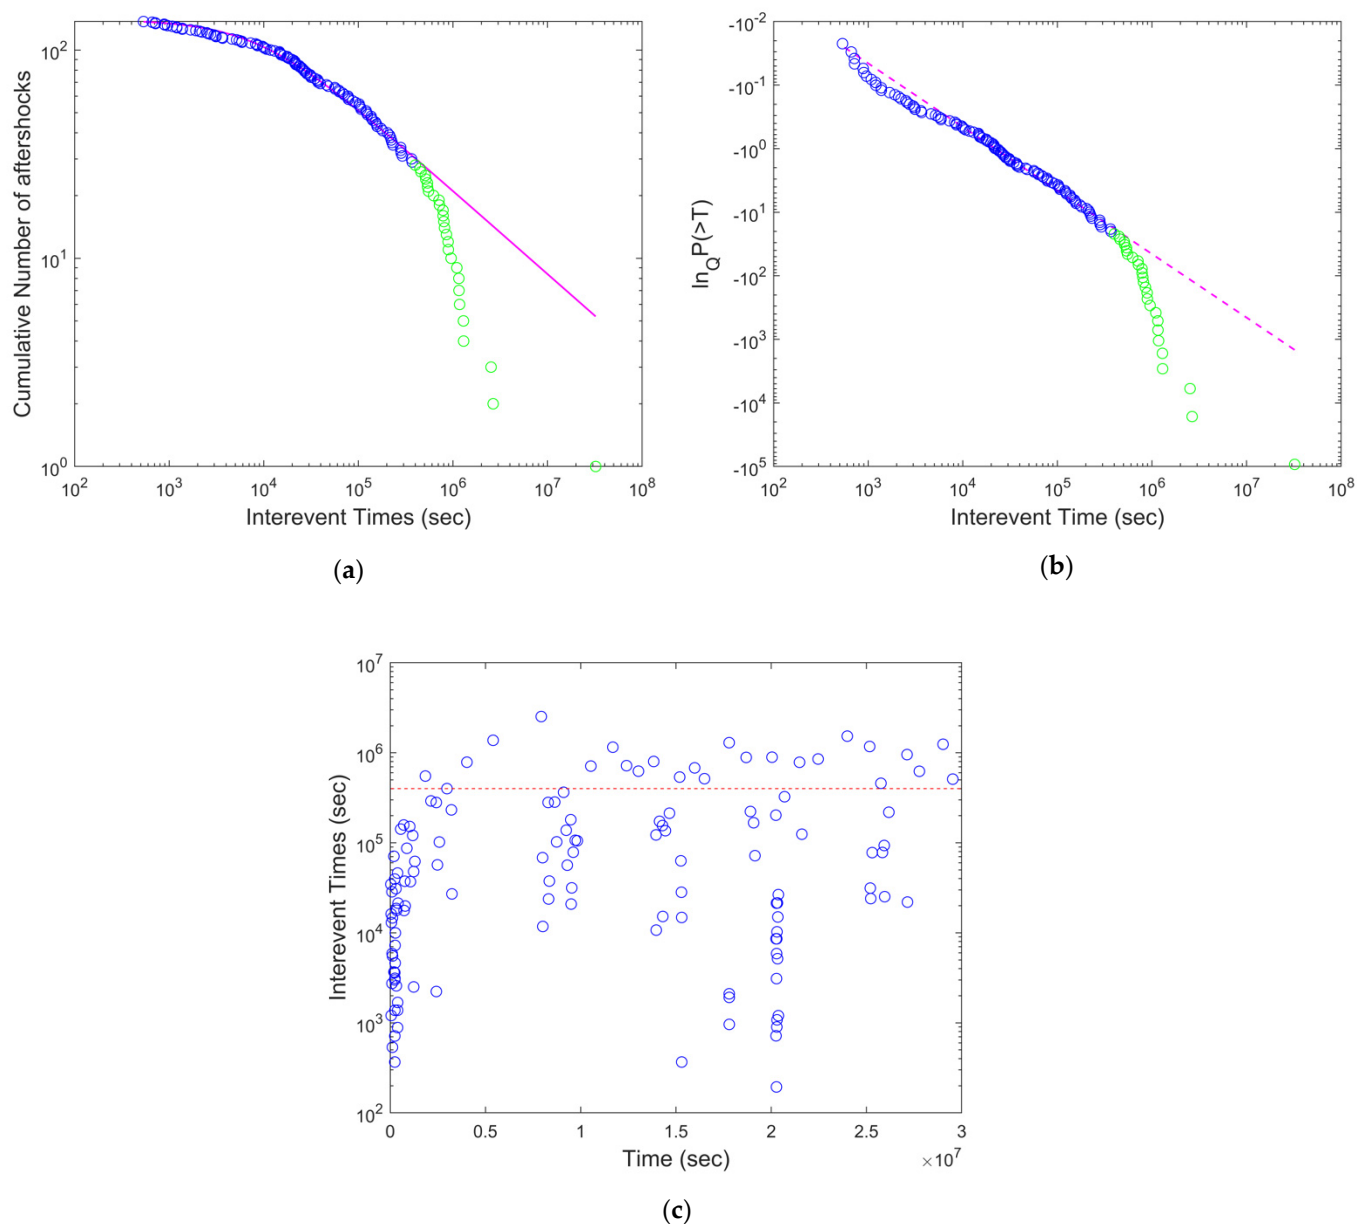

**Figure S22.** (a) The cumulative distribution function of the interevent times for the 2011  $M_w$  7.6 Kermadec Earthquake (New Zealand). The magenta line is the Q-exponential function fitting with  $q = 1.71$ . (b) The Q-logarithmic function of  $P(>T)$  as a function of the interevent times, where the dashed line is the fitting with  $q = 1.71$ . The deviation from linearity suggests  $T_c$  values close to  $4 \times 10^5$  s. The correlation coefficient for the Q-logarithmic function up to  $T_c$  is  $R^2 = 0.9821$ . (c) The evolution of the interevent time ( $T$ ) as a function of the time ( $t$ ) since the main event. The  $T$  value is indicated by the red dashed line.

### 23. The 2012 $M_w$ 8.6 West Coast of Northern Sumatra Earthquake

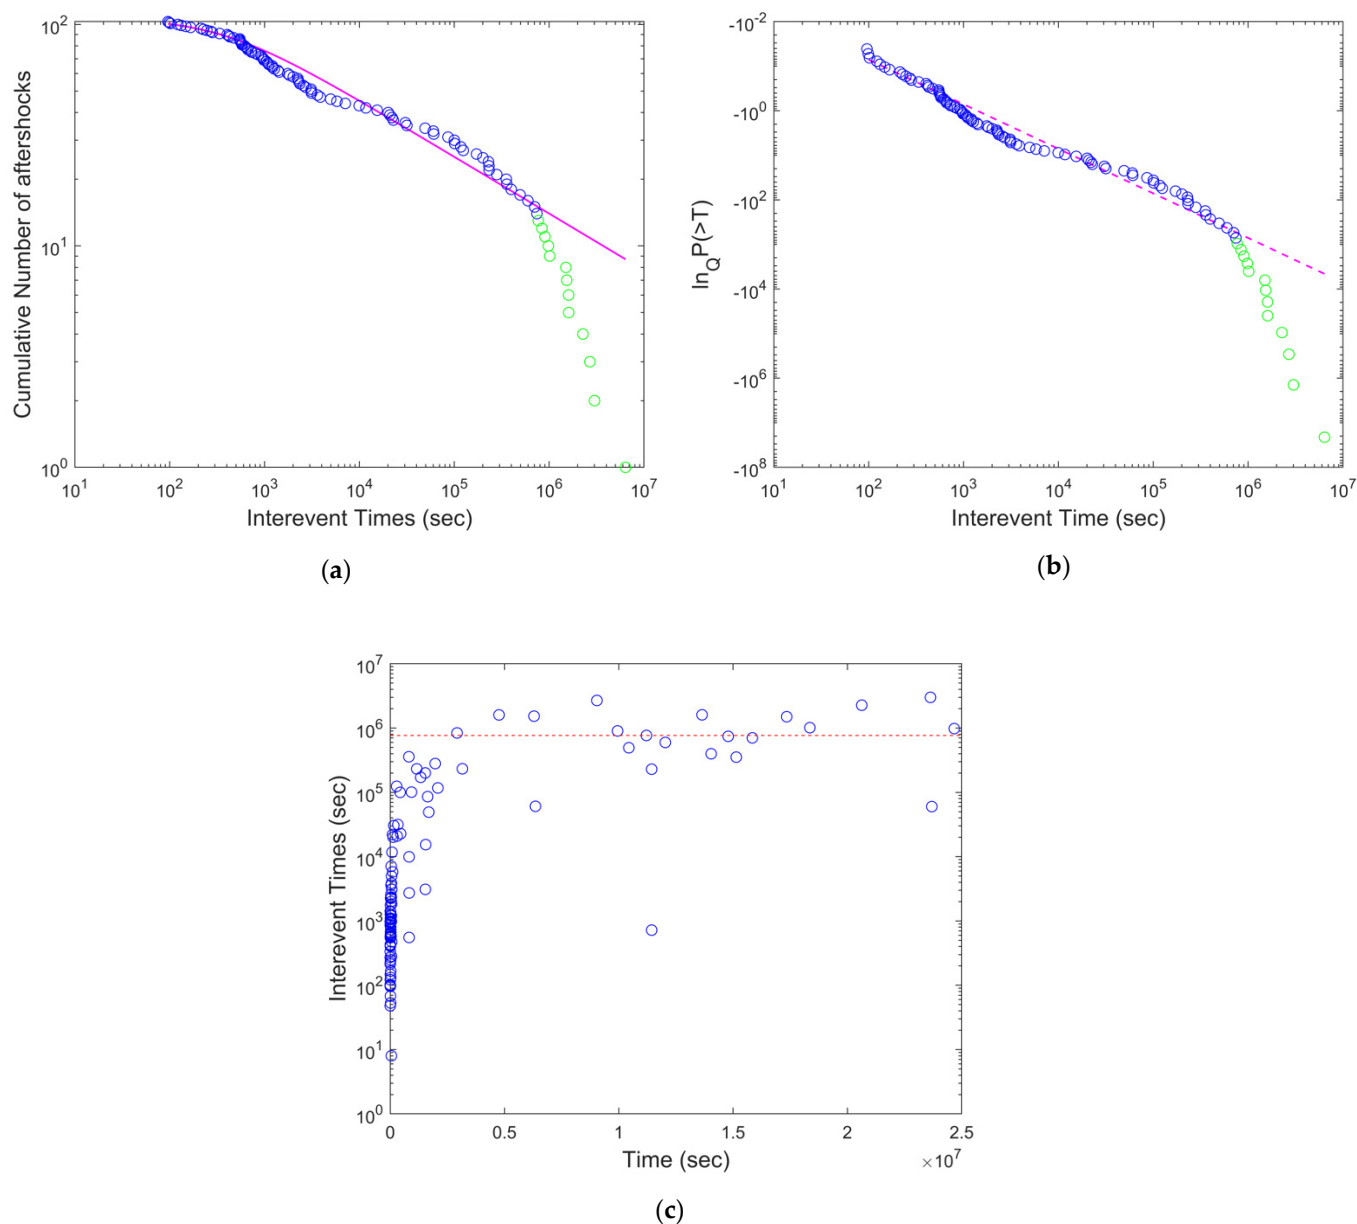

**Figure S23.** (a) The cumulative distribution function of the interevent times for the 2012  $M_w$  8.6 West Coast of Northern Sumatra Earthquake. The magenta line is the Q-exponential function fitting with  $q = 1.80$ . (b) The Q-logarithmic function of  $P(>T)$  as a function of the interevent times, where the dashed line is the fitting with  $q = 1.80$ . The deviation from linearity suggests  $T_c$  values close to  $8 \times 10^5$  s. The correlation coefficient for the Q-logarithmic function up to  $T_c$  is  $R^2 = 0.9411$ . (c) The evolution of the interevent time ( $T$ ) as a function of the time ( $t$ ) since the main event. The  $T_c$  value is indicated by the red dashed line.

## 24. The 2013 $M_w$ 7.0 Atka Earthquake (Alaska)

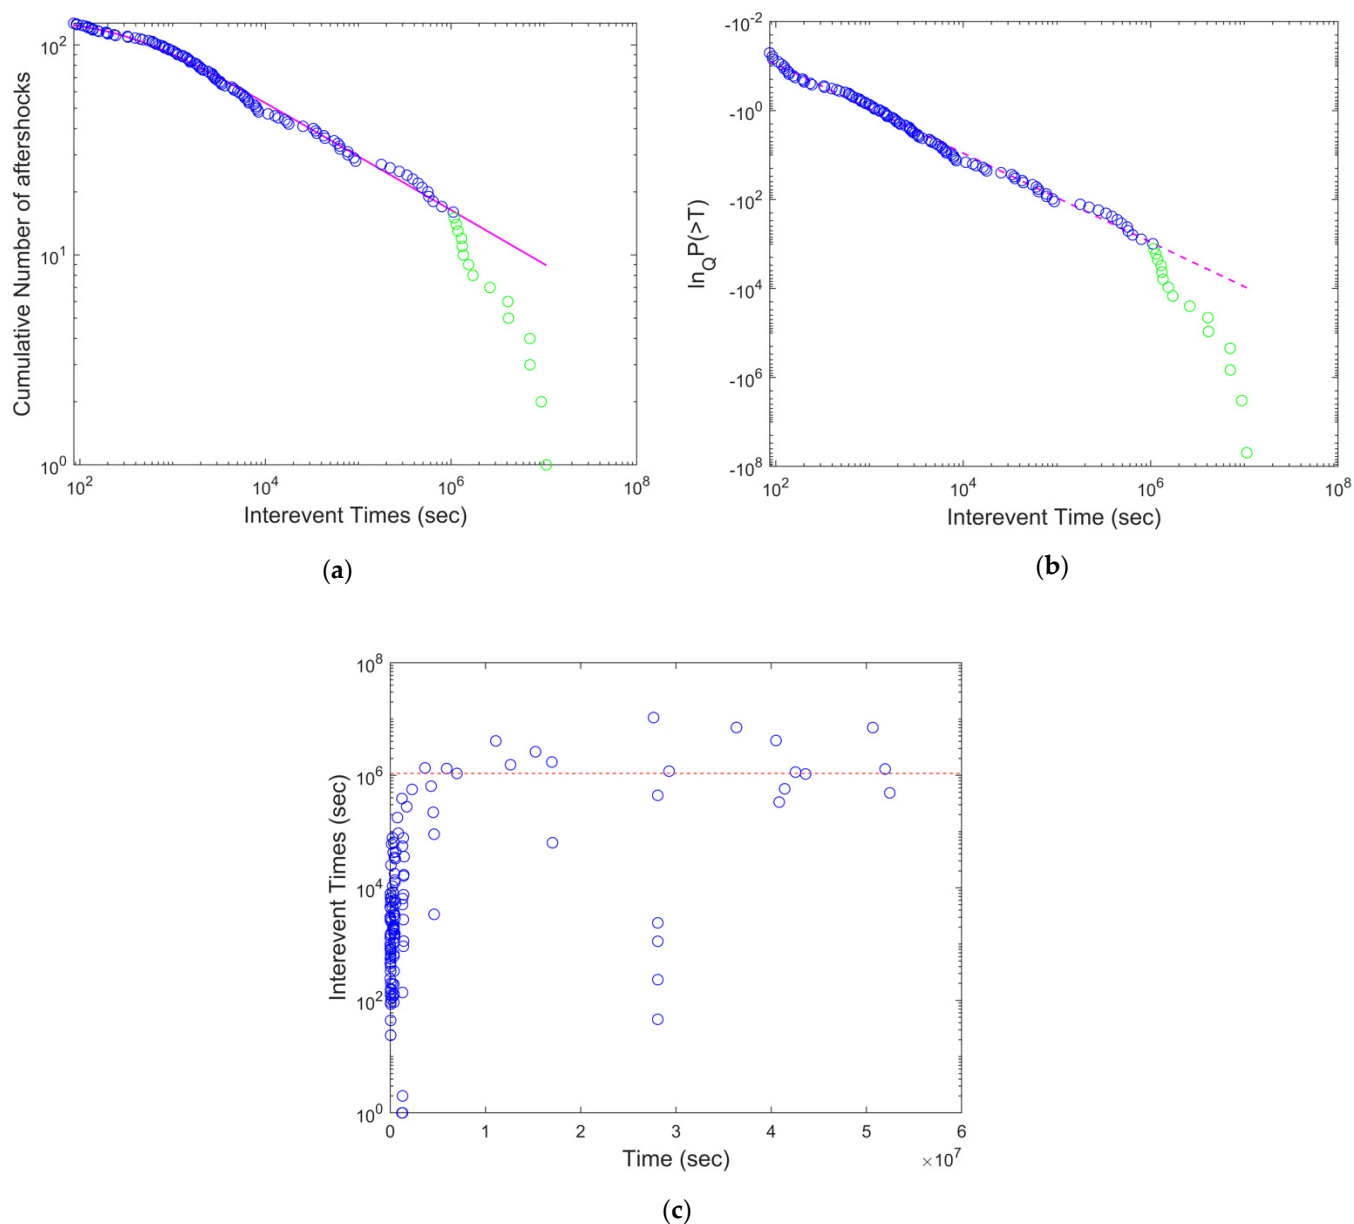

**Figure S24.** (a) The cumulative distribution function of the interevent times for the 2013  $M_w$  7.0 Atka Earthquake (Alaska). The magenta line is the Q-exponential function fitting with  $q = 1.80$ . (b) The Q-logarithmic function of  $P(>T)$  as a function of the interevent times, where the dashed line is the fitting with  $q = 1.80$ . The deviation from linearity suggests  $T_c$  values close to  $1 \times 10^6$  s. The correlation coefficient for the Q-logarithmic function up to  $T_c$  is  $R^2 = 0.9744$ . (c) The evolution of the interevent time ( $T$ ) as a function of the time ( $t$ ) since the main event. The  $T$  value is indicated by the red dashed line.

### 25. The 2014 M<sub>w</sub> 7.6 Kirakira Earthquake (Solomon Islands)

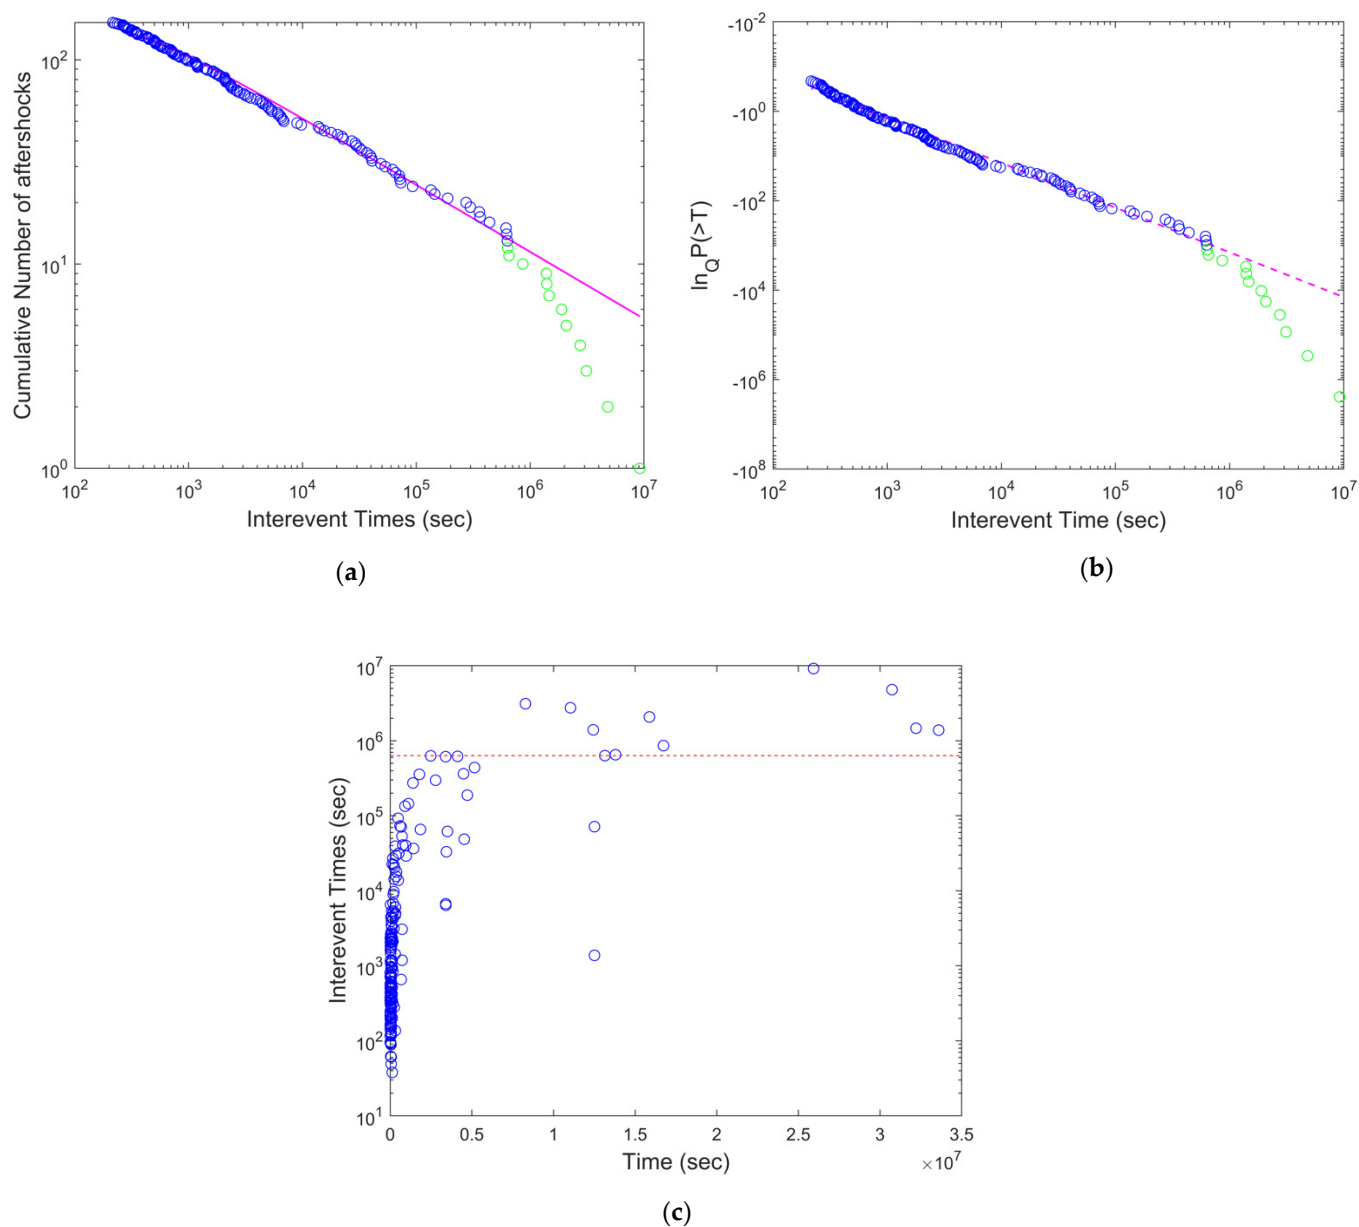

**Figure S25.** (a) The cumulative distribution function of the interevent times for the 2014 M<sub>w</sub> 7.6 Kirakira Earthquake (Solomon Islands). The magenta line is the Q-exponential function fitting with  $q = 1.75$ . (b) The Q-logarithmic function of  $P(>T)$  as a function of the interevent times, where the dashed line is the fitting with  $q = 1.75$ . The deviation from linearity suggests  $T_c$  values close to  $6 \times 10^6$  s. The correlation coefficient for the Q-logarithmic function up to  $T_c$  is  $R^2 = 0.9711$ . (c) The evolution of the interevent time ( $T$ ) as a function of the time ( $t$ ) since the main event. The  $T$  value is indicated by the red dashed line.

## 26. The 2014 M<sub>w</sub> 7.5 Panguna Earthquake (Papua New Guinea)

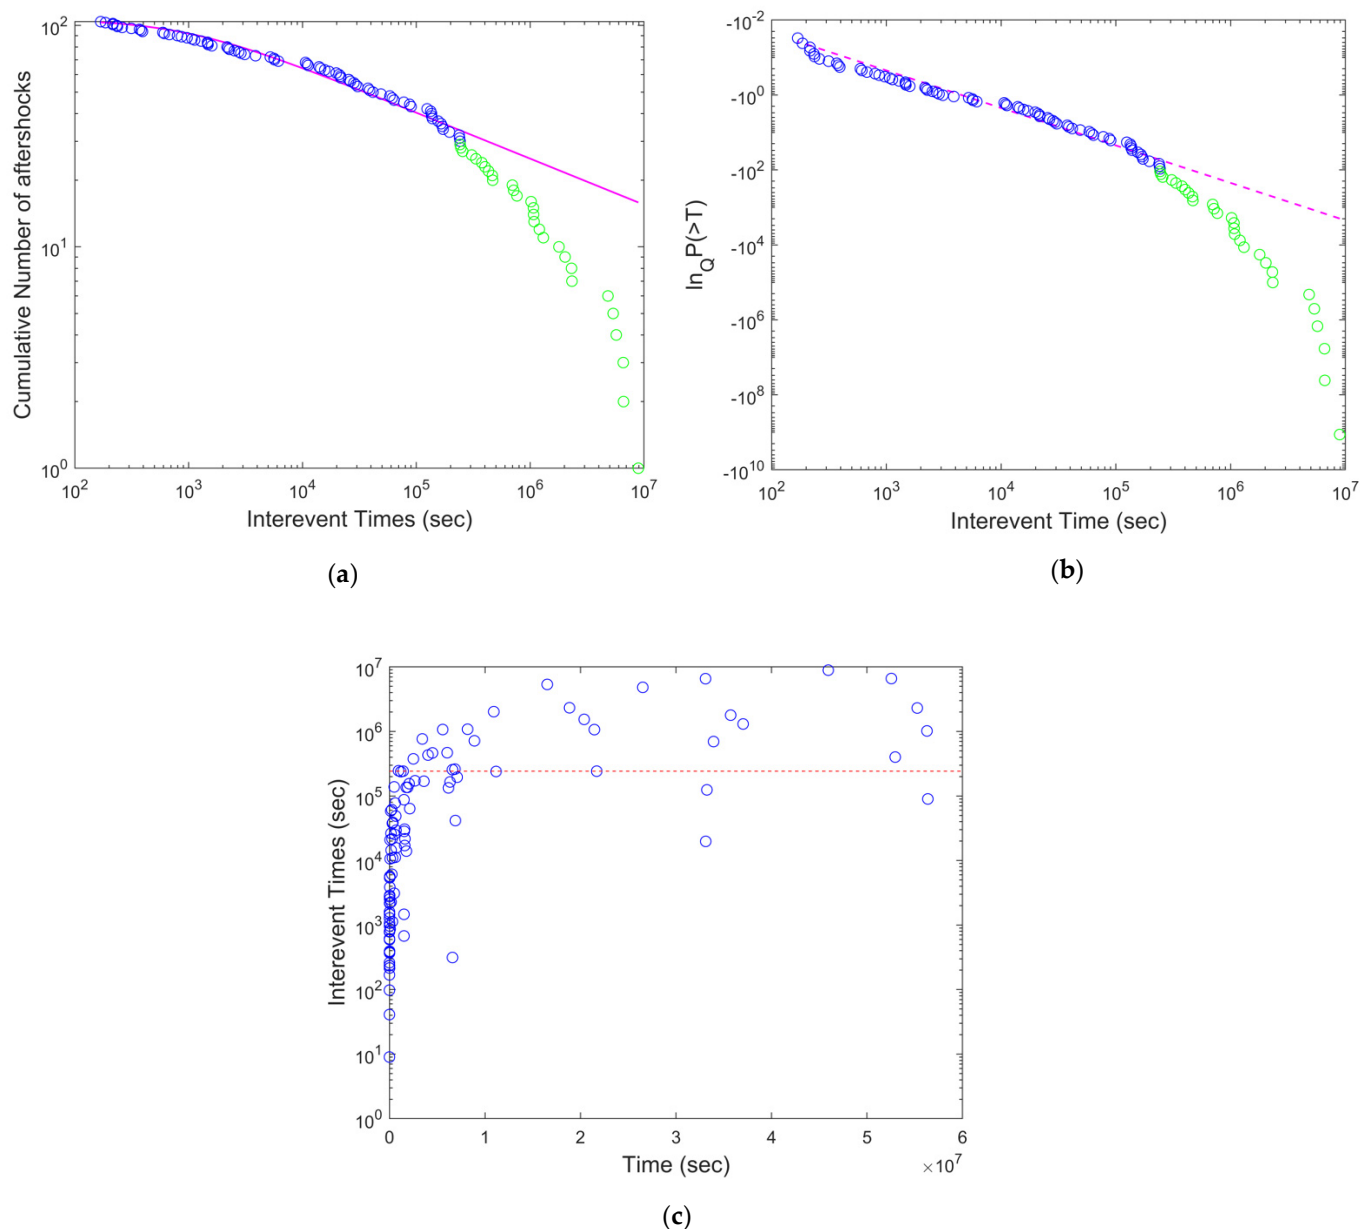

**Figure S26.** (a) The cumulative distribution function of the interevent times for the 2014 M<sub>w</sub> 7.5 Panguna Earthquake (Papua New Guinea). The magenta line is the Q-exponential function fitting with  $q = 1.83$ . (b) The Q-logarithmic function of  $P(>T)$  as a function of the interevent times, where the dashed line is the fitting with  $q = 1.83$ . The deviation from linearity suggests  $T_c$  values close to  $2 \times 10^5$  s. The correlation coefficient for the Q-logarithmic function up to  $T_c$  is  $R^2 = 0.9173$ . (c) The evolution of the interevent time ( $T$ ) as a function of the time ( $t$ ) since the main event. The  $T$  value is indicated by the red dashed line.

### 27. The 2014 $M_w$ 7.1 Ternate Earthquake (Indonesia)

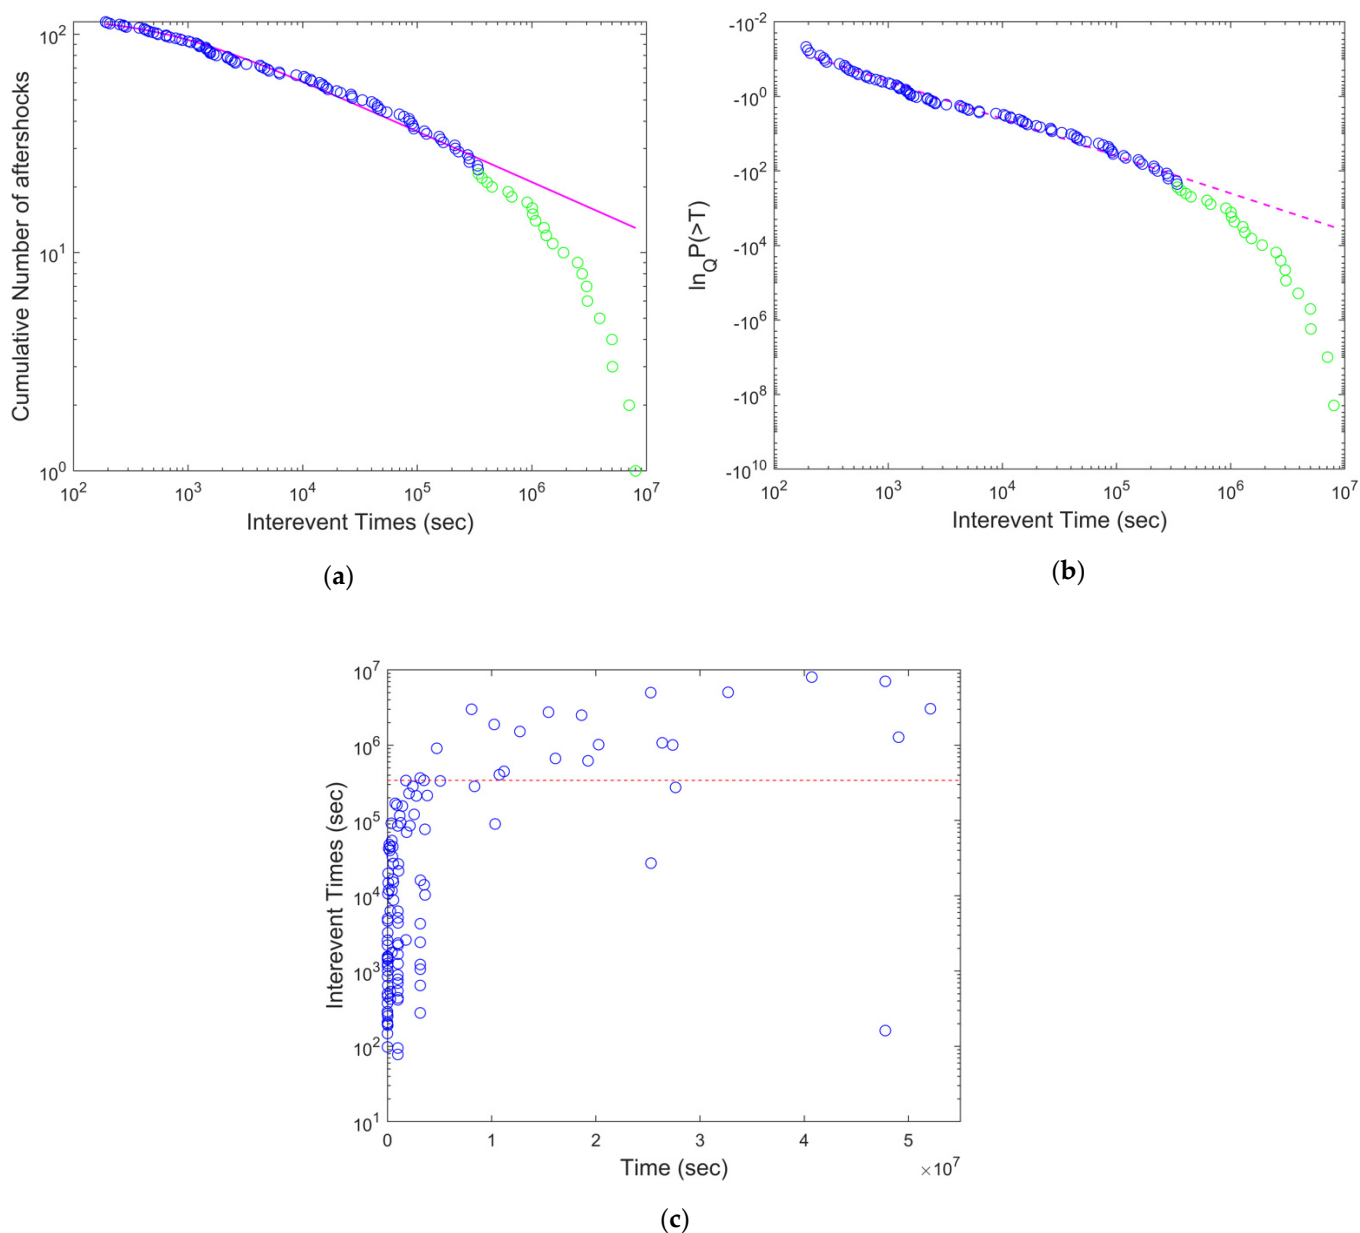

**Figure S27.** (a) The cumulative distribution function of the interevent times for the 2014  $M_w$  7.1 Ternate Earthquake (Indonesia). The magenta line is the Q-exponential function fitting with  $q = 1.81$ . (b) The Q-logarithmic function of  $P(>T)$  as a function of the interevent times, where the dashed line is the fitting with  $q = 1.81$ . The deviation from linearity suggests  $T_c$  values close to  $3 \times 10^5$  s. The correlation coefficient for the Q-logarithmic function up to  $T_c$  is  $R^2 = 0.9369$ . (c) The evolution of the interevent time ( $T$ ) as a function of the time ( $t$ ) since the main event. The  $T$  value is indicated by the red dashed line.



### 28. The 2015 Mw7.5 Kokopo Earthquake (Papua New Guinea)

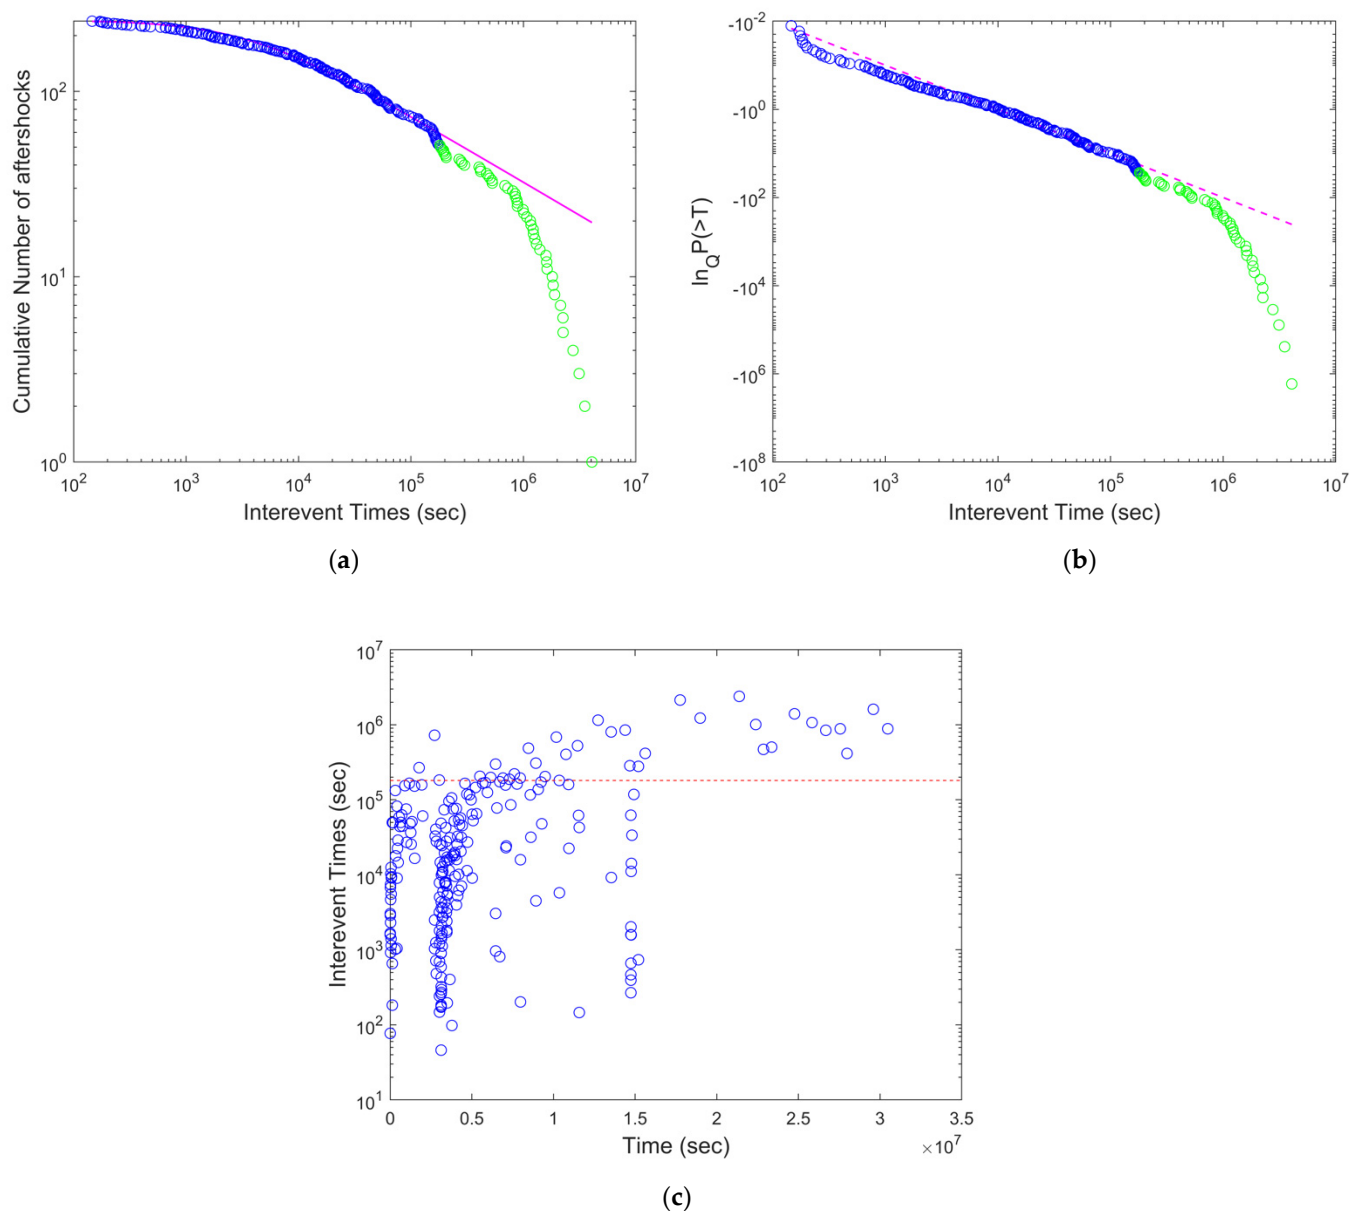

**Figure S28.** (a) The cumulative distribution function of the interevent times for the 2015 Mw7.5 Kokopo Earthquake (Papua New Guinea). The magenta line is the Q-exponential function fitting with  $q = 1.71$ . (b) The Q-logarithmic function of  $P(>T)$  as a function of the interevent times, where the dashed line is the fitting with  $q = 1.71$ . The deviation from linearity suggests  $T_c$  values close to  $2 \times 10^5$  s. The correlation coefficient for the Q-logarithmic function up to  $T_c$  is  $R^2 = 0.9694$ . (c) The evolution of the interevent time ( $T$ ) as a function of the time ( $t$ ) since the main event. The  $T$  value is indicated by the red dashed line.

## 29. The 2015 $M_w$ 8.3 Illapel (Chile) Earthquake

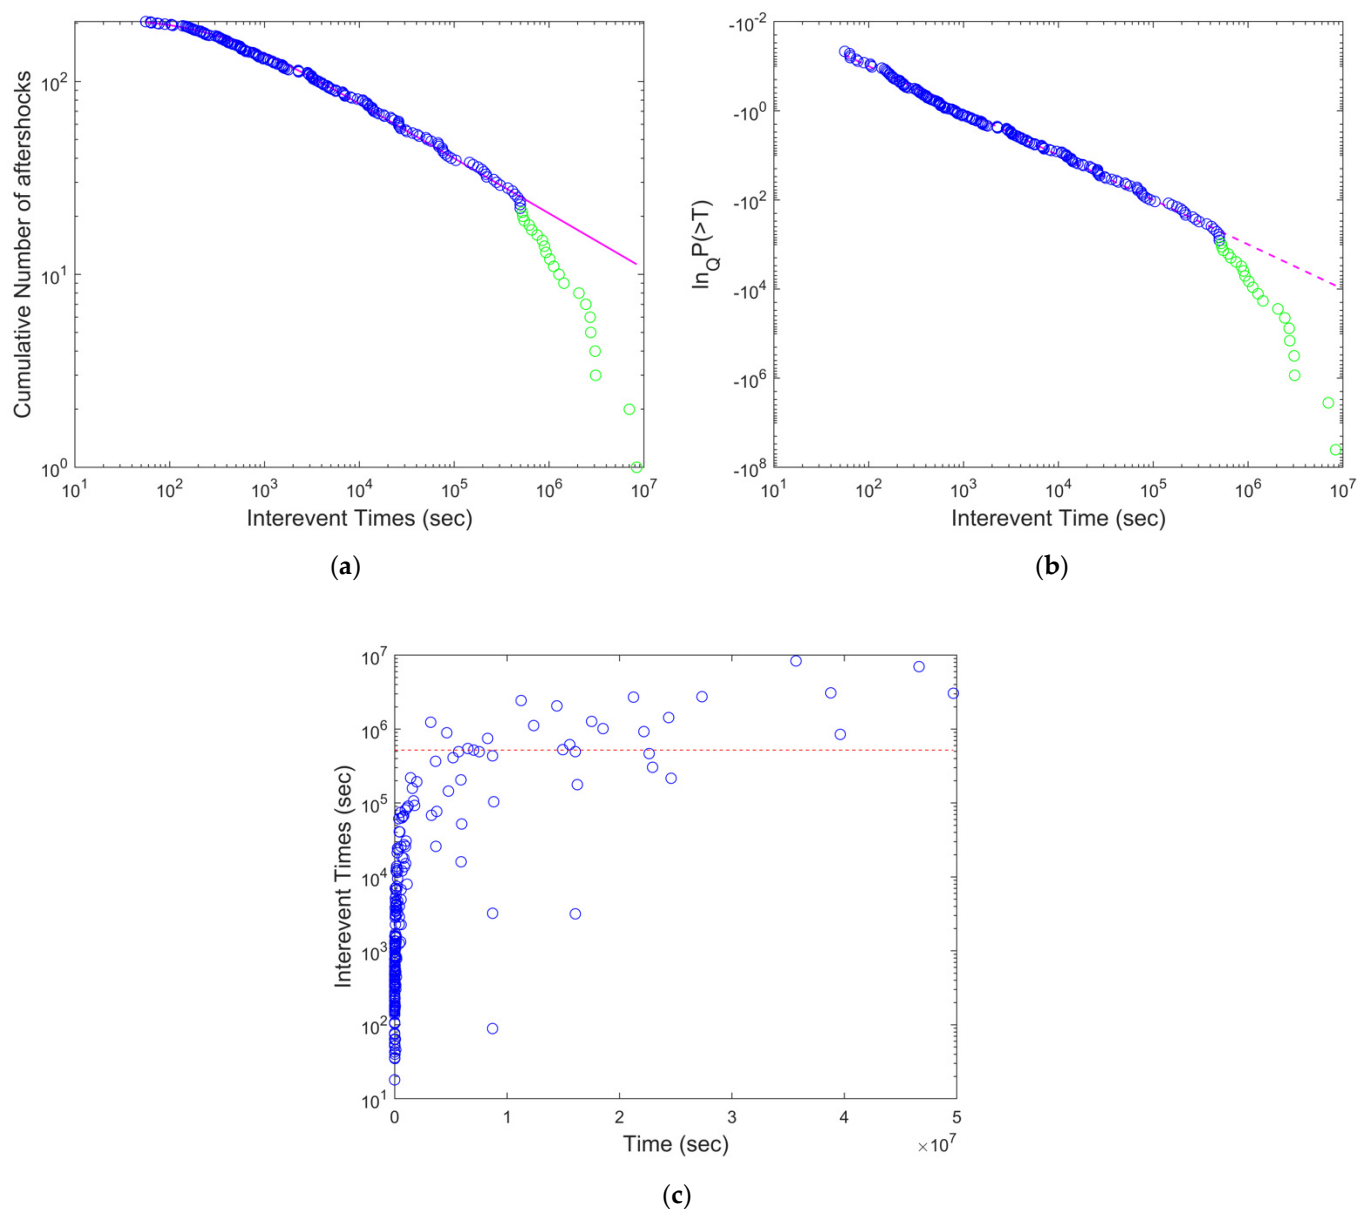

**Figure S29.** (a) The cumulative distribution function of the interevent times for the 2015  $M_w$  8.3 Illapel (Chile) Earthquake. The magenta line is the Q-exponential function fitting with  $q = 1.78$ . (b) The Q-logarithmic function of  $P(>T)$  as a function of the interevent times, where the dashed line is the fitting with  $q = 1.78$ . The deviation from linearity suggests  $T_c$  values close to  $6 \times 10^5$  s. The correlation coefficient for the Q-logarithmic function up to  $T_c$  is  $R^2 = 0.9528$ . (c) The evolution of the interevent time ( $T$ ) as a function of the time ( $t$ ) since the main event. The  $T$  value is indicated by the red dashed line.

### 30. The 2016 $M_w$ 7.2 South Sandwich Islands Earthquake

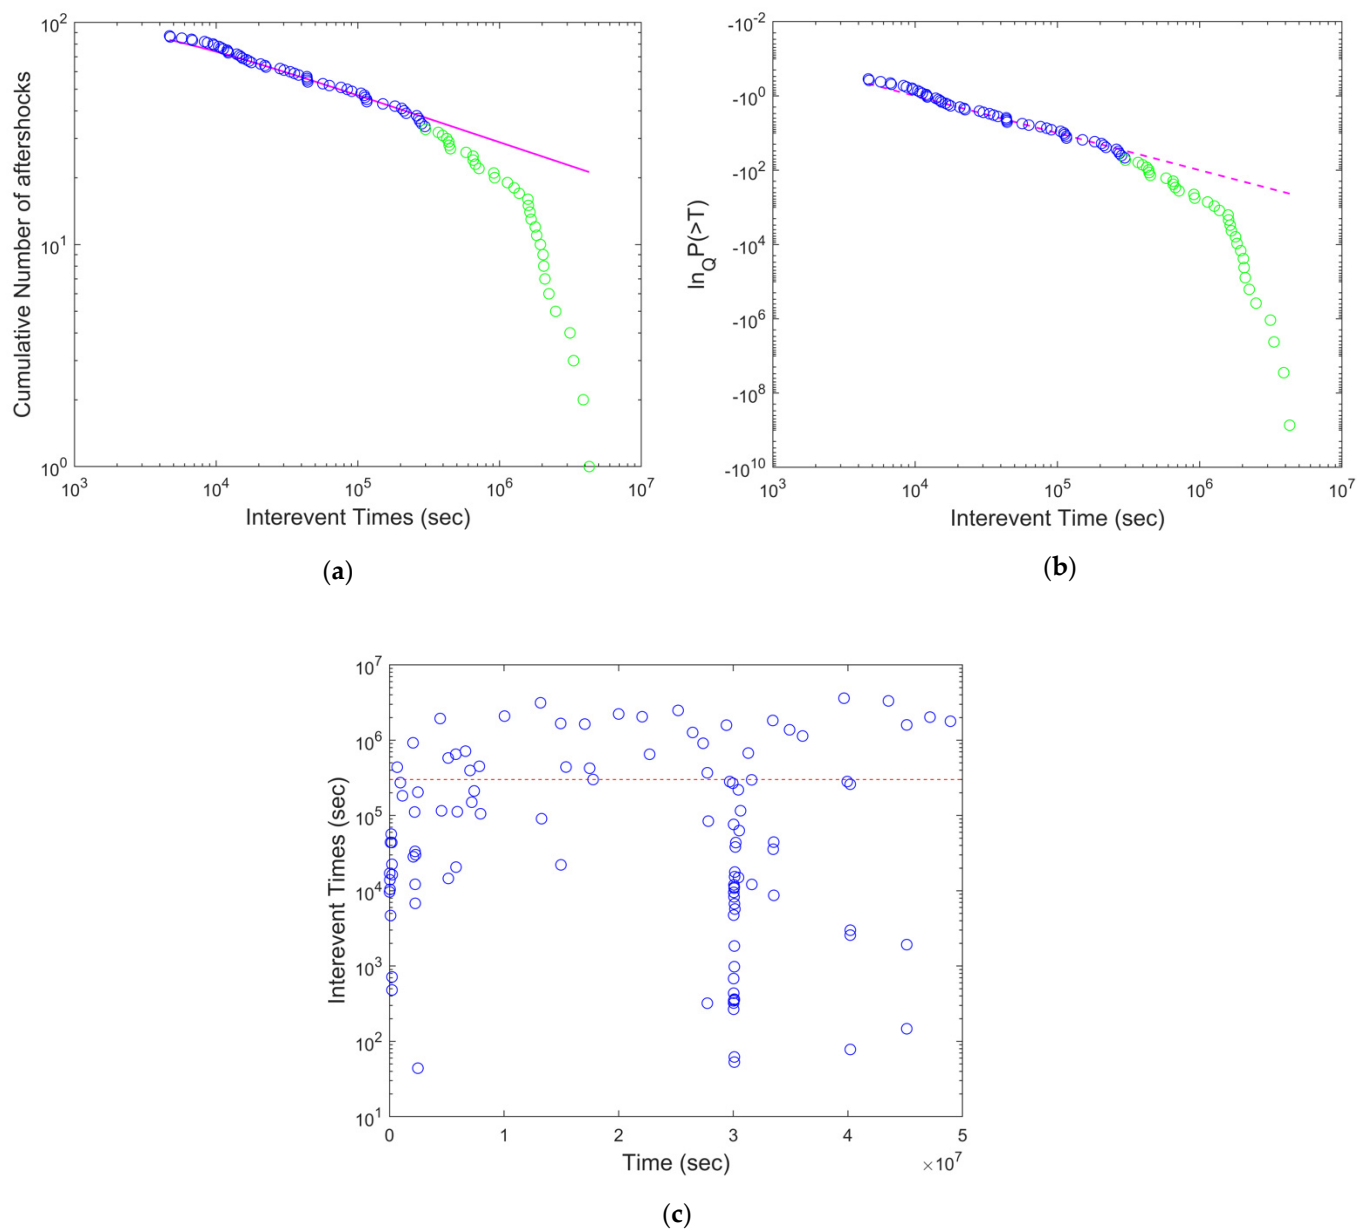

**Figure S30.** (a) The cumulative distribution function of the interevent times for the 2016  $M_w$  7.2 South Sandwich Islands Earthquake. The magenta line is the Q-exponential function fitting with  $q = 1.78$ . (b) The Q-logarithmic function of  $P(>T)$  as a function of the interevent times, where the dashed line is the fitting with  $q = 1.78$ . The deviation from linearity suggests  $T_c$  values close to  $3 \times 10^5$  s. The correlation coefficient for the Q-logarithmic function up to  $T_c$  is  $R^2 = 0.9579$ . (c) The evolution of the interevent time ( $T$ ) as a function of the time ( $t$ ) since the main event. The  $T$  value is indicated by the red dashed line.

### 31. The 2016 M<sub>w</sub> 7.0 Gisborne (New Zealand) Earthquake

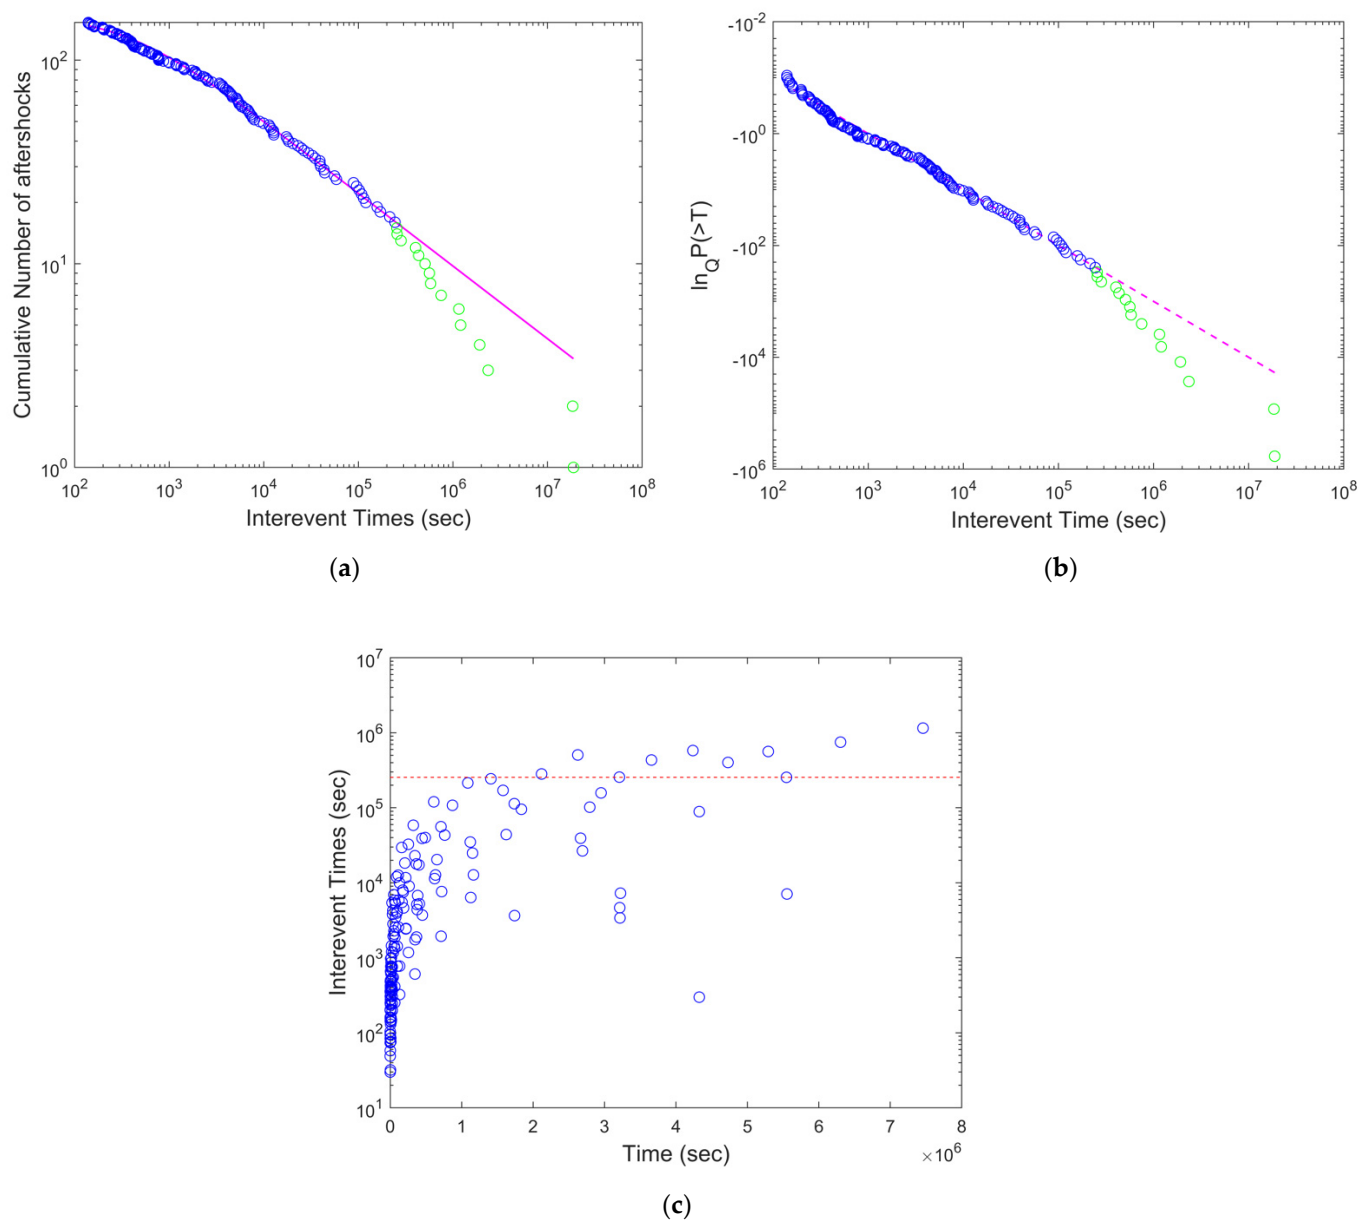

**Figure S31.** (a) The cumulative distribution function of the interevent times for the 2016 M<sub>w</sub> 7.0 Gisborne (New Zealand) Earthquake. The magenta line is the Q-exponential function fitting with  $q = 1.74$ . (b) The Q-logarithmic function of  $P(>T)$  as a function of the interevent times, where the dashed line is the fitting with  $q = 1.74$ . The deviation from linearity suggests  $T_c$  values close to  $3 \times 10^5$  s. The correlation coefficient for the Q-logarithmic function up to  $T_c$  is  $R^2 = 0.9943$ . (c) The evolution of the interevent time ( $T$ ) as a function of the time ( $t$ ) since the main event. The  $T$  value is indicated by the red dashed line.

### 32. The 2016 M<sub>w</sub> 7.8 Kirakira Earthquake (Solomon Islands)

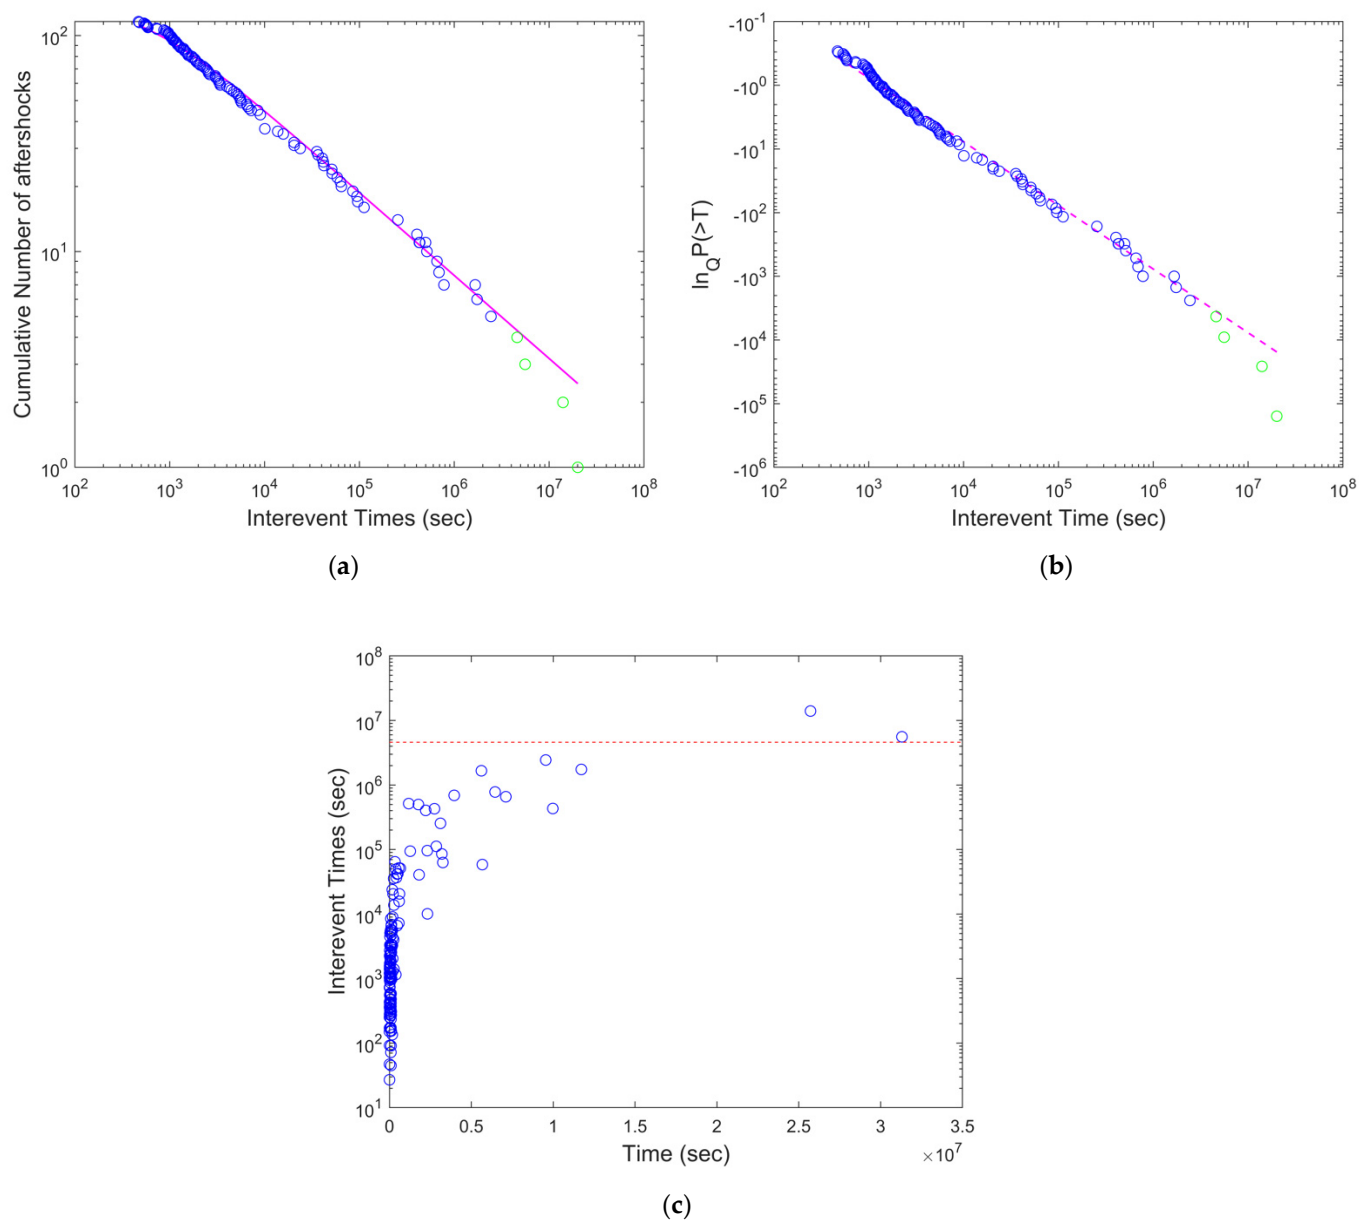

**Figure S32.** (a) The cumulative distribution function of the interevent times for the 2016 M<sub>w</sub> 7.8 Kirakira Earthquake (Solomon Islands). The magenta line is the Q-exponential function fitting with  $q = 1.72$ . (b) The Q-logarithmic function of  $P(>T)$  as a function of the interevent times, where the dashed line is the fitting with  $q = 1.72$ . The deviation from linearity suggests  $T_c$  values close to  $5 \times 10^6$  s. The correlation coefficient for the Q-logarithmic function up to  $T_c$  is  $R^2 = 0.9590$ . (c) The evolution of the interevent time ( $T$ ) as a function of the time ( $t$ ) since the main event. The  $T$  value is indicated by the red dashed line.

### 33. The 2016 $M_w$ 7.8 Waiiau (New Zealand)

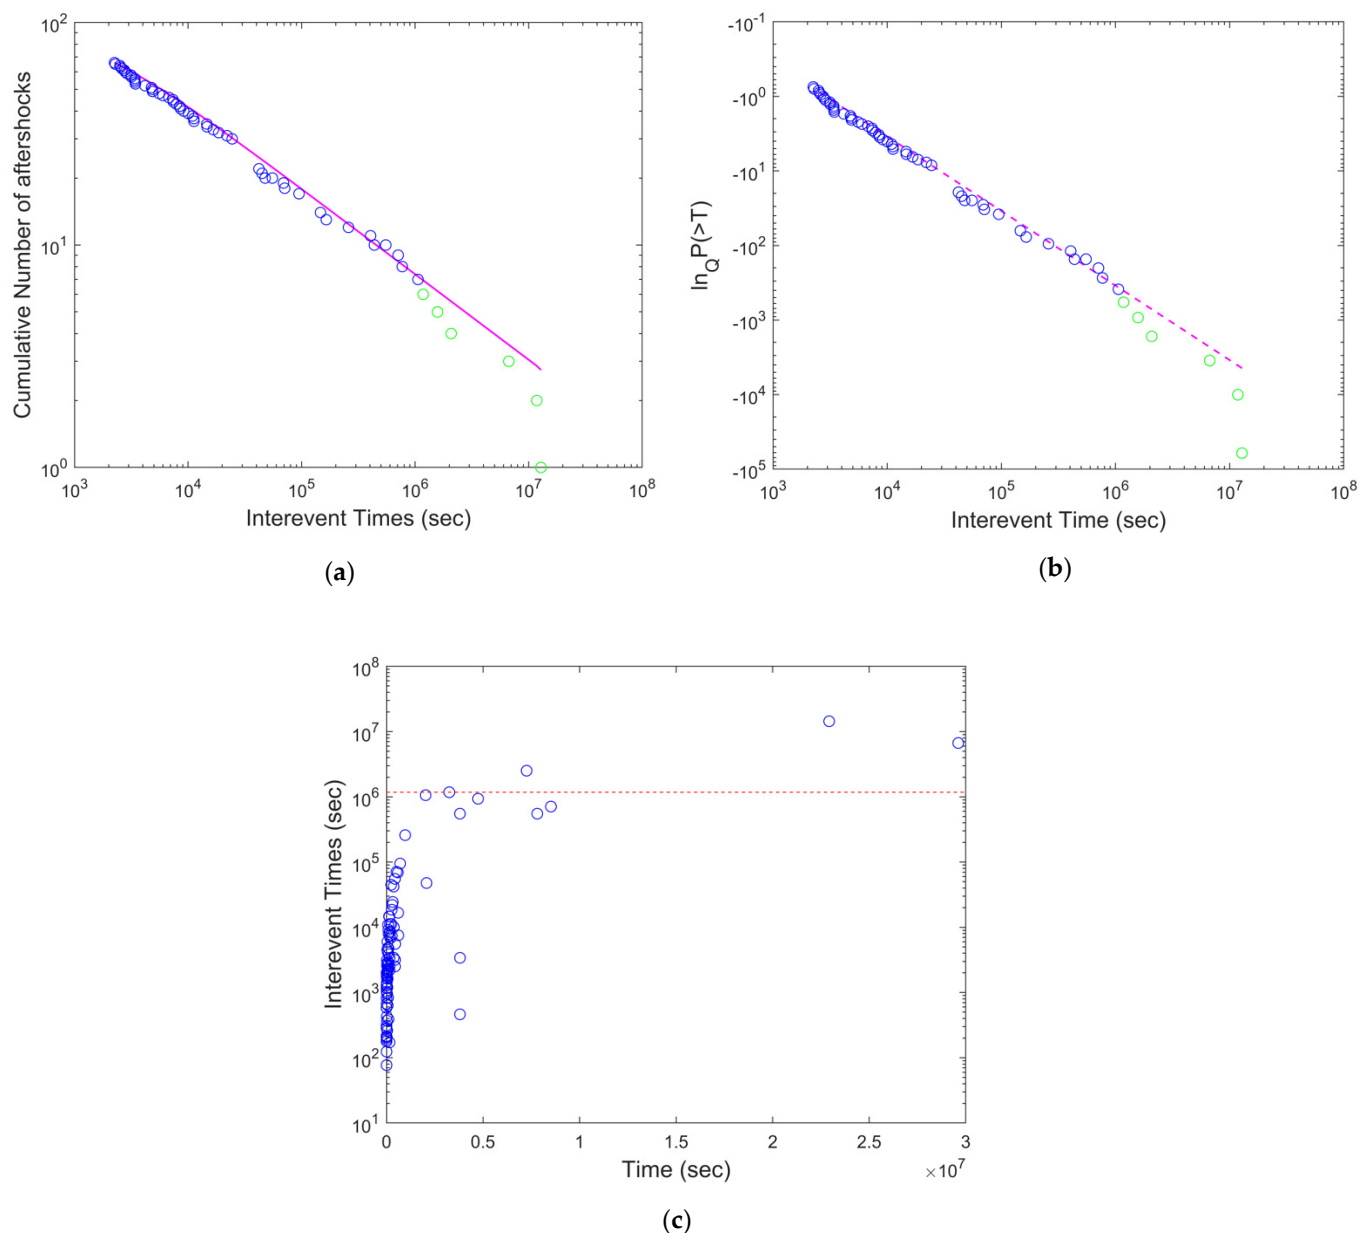

**Figure S33.** (a) The cumulative distribution function of the interevent times for the 2016  $M_w$  7.8 Waiiau Earthquake (New Zealand). The magenta line is the Q-exponential function fitting with  $q = 1.72$ . (b) The Q-logarithmic function of  $P(>T)$  as a function of the interevent times, where the dashed line is the fitting with  $q = 1.72$ . The deviation from linearity suggests  $T_c$  values close to  $1 \times 10^6$  s. The correlation coefficient for the Q-logarithmic function up to  $T_c$  is  $R^2 = 0.9843$ . (c) The evolution of the interevent time ( $T$ ) as a function of the time ( $t$ ) since the main event. The  $T$  value is indicated by the red dashed line.

### 34. The 2017 $M_w$ 8.2 Chiapas (Mexico) Earthquake

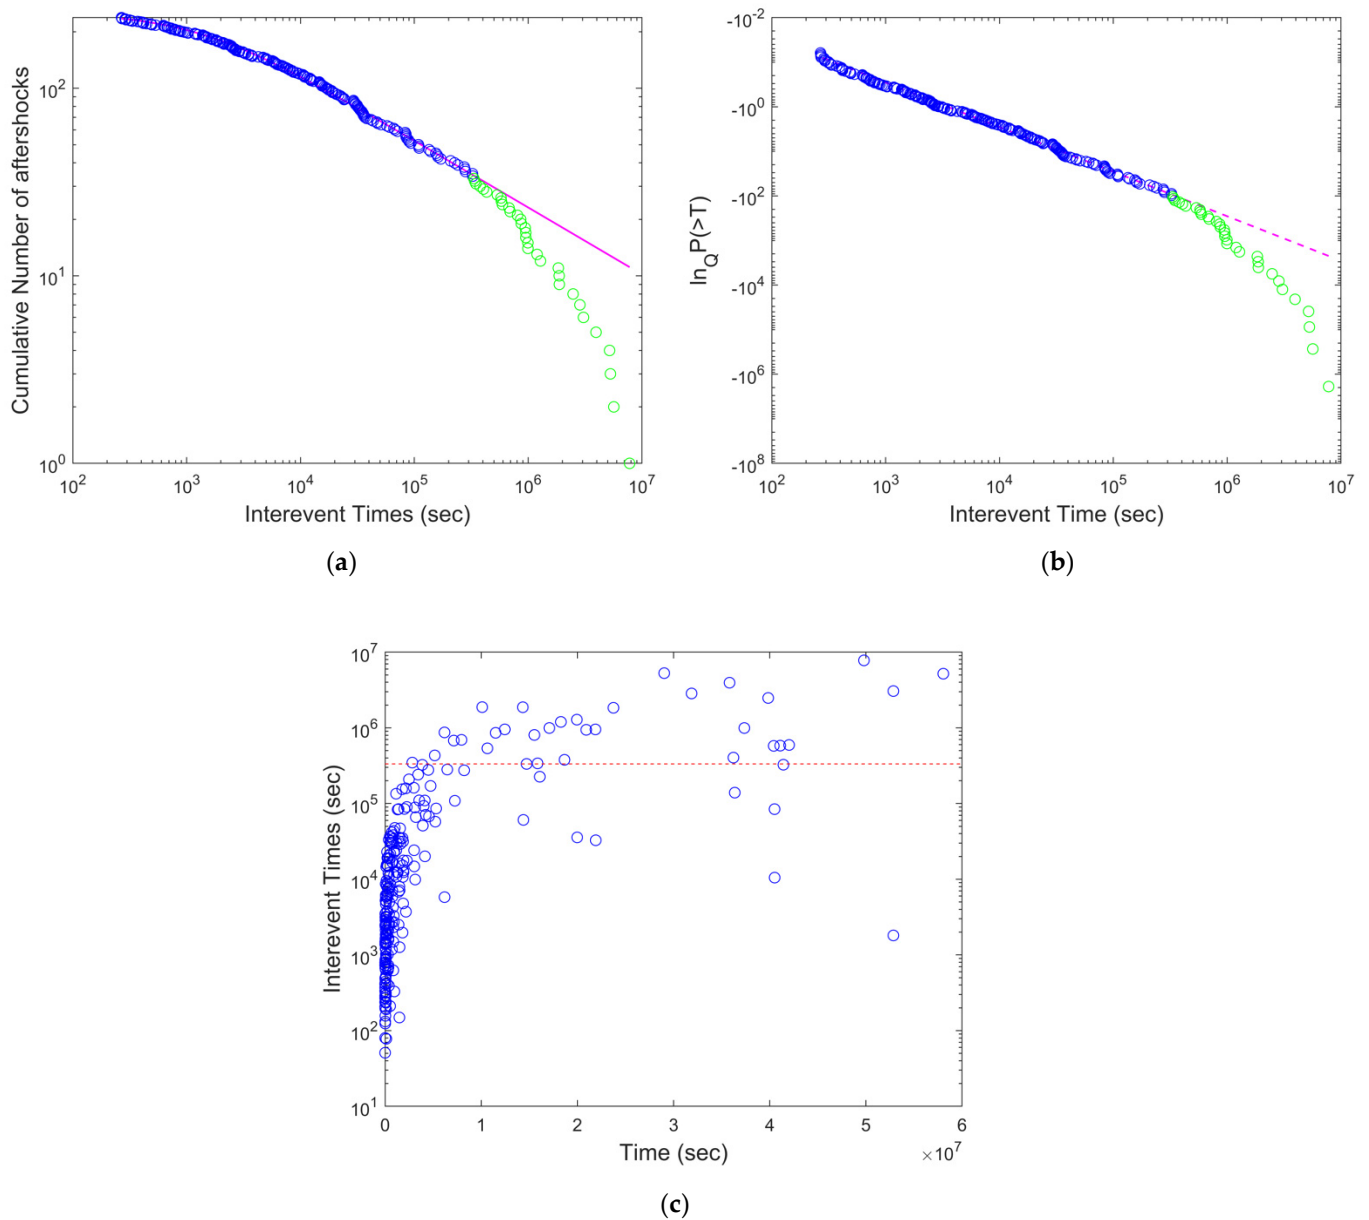

**Figure S34.** (a) The cumulative distribution function of the interevent times for the 2017  $M_w$  8.2 Chiapas (Mexico) Earthquake. The magenta line is the Q-exponential function fitting with  $q = 1.74$ . (b) The Q-logarithmic function of  $P(>T)$  as a function of the interevent times, where the dashed line is the fitting with  $q = 1.74$ . The deviation from linearity suggests  $T_c$  values close to  $3 \times 10^5$  s. The correlation coefficient for the Q-logarithmic function up to  $T_c$  is  $R^2 = 0.9950$ . (c) The evolution of the interevent time ( $T$ ) as a function of the time ( $t$ ) since the main event. The  $T$  value is indicated by the red dashed line.

### 35. The 2018 $M_w$ 7.9 Chiniak Earthquake (Alaska)

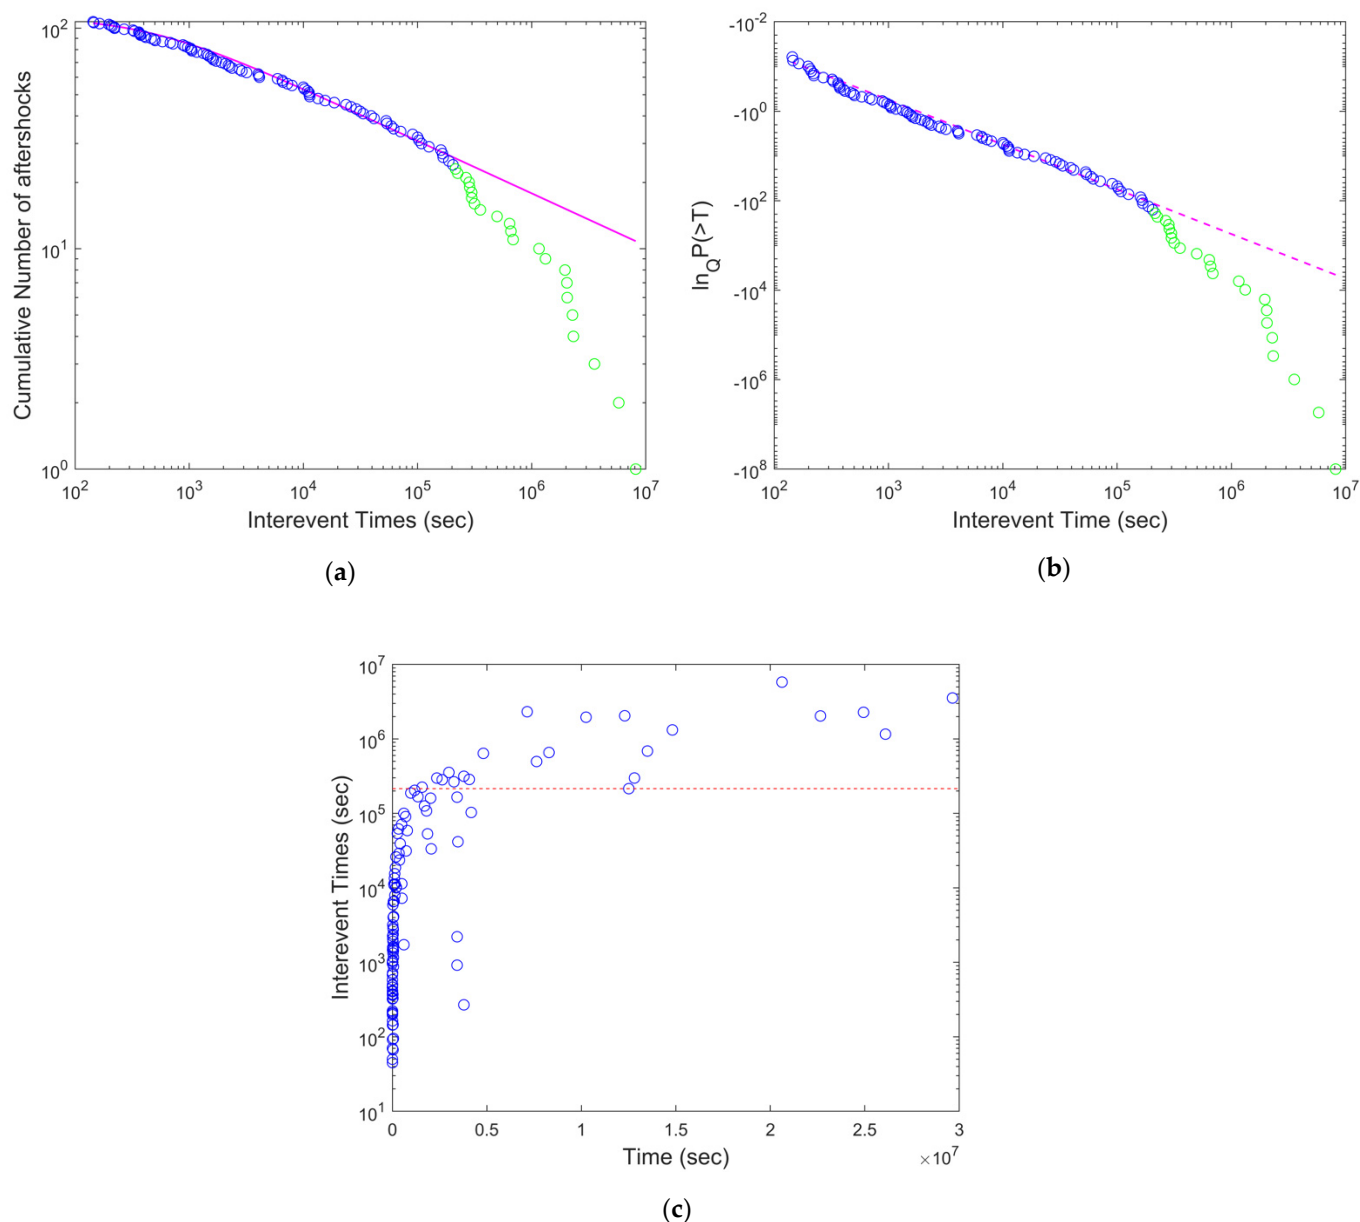

**Figure S35.** (a) The cumulative distribution function of the interevent times for the 2018  $M_w$  7.9 Chiniak Earthquake (Alaska). The magenta line is the Q-exponential function fitting with  $q = 1.81$ . (b) The Q-logarithmic function of  $P(>T)$  as a function of the interevent times, where the dashed line is the fitting with  $q = 1.81$ . The deviation from linearity suggests  $T_c$  values close to  $2 \times 10^5$  s. The correlation coefficient for the Q-logarithmic function up to  $T_c$  is  $R^2 = 0.9651$ . (c) The evolution of the interevent time ( $T$ ) as a function of the time ( $t$ ) since the main event. The  $T$  value is indicated by the red dashed line.



### 36. The 2018 $M_w$ 7.5 Tadine Earthquake (New Caledonia)

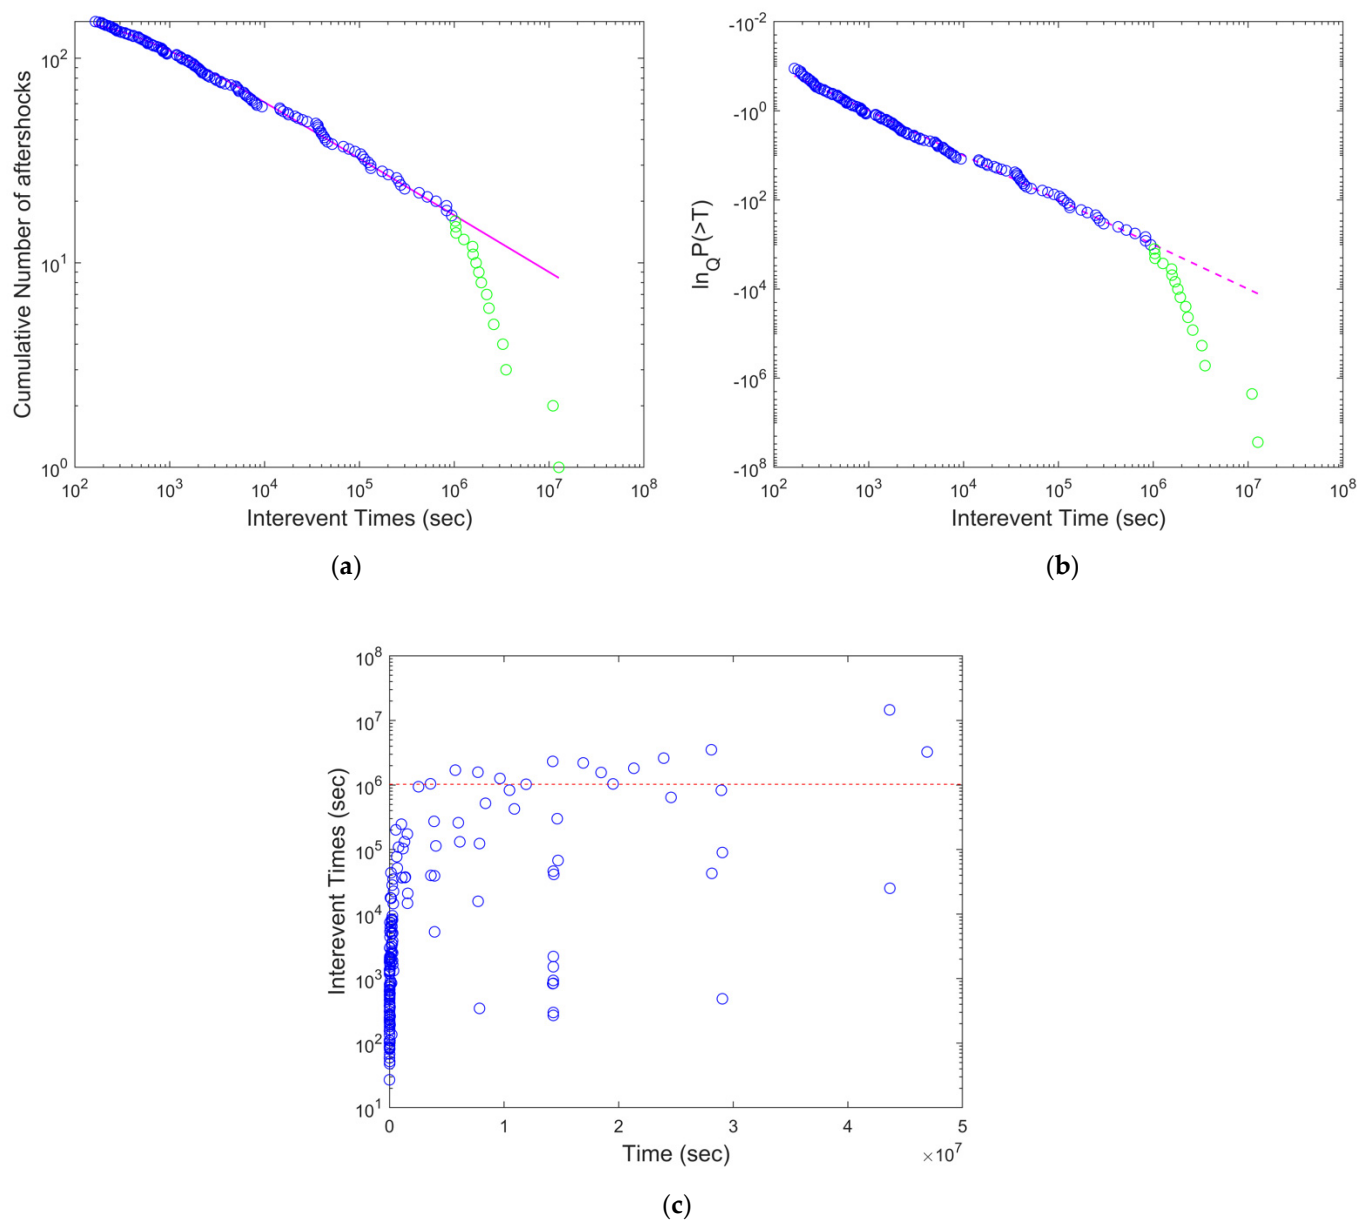

**Figure S36.** (a) The cumulative distribution function of the interevent times for the 2018  $M_w$  7.5 Tadine Earthquake (New Caledonia). The magenta line is the Q-exponential function fitting with  $q = 1.78$ . (b) The Q-logarithmic function of  $P(>T)$  as a function of the interevent times, where the dashed line is the fitting with  $q = 1.78$ . The deviation from linearity suggests  $T_c$  values close to  $1 \times 10^5$  s. The correlation coefficient for the Q-logarithmic function up to  $T_c$  is  $R^2 = 0.9882$ . (c) The evolution of the interevent time ( $T$ ) as a function of the time ( $t$ ) since the main event. The  $T$  value is indicated by the red dashed line.

### 37. The 2018 $M_w$ 7.3 Uts'-Kamchatsk Staryy (Russia) Earthquake

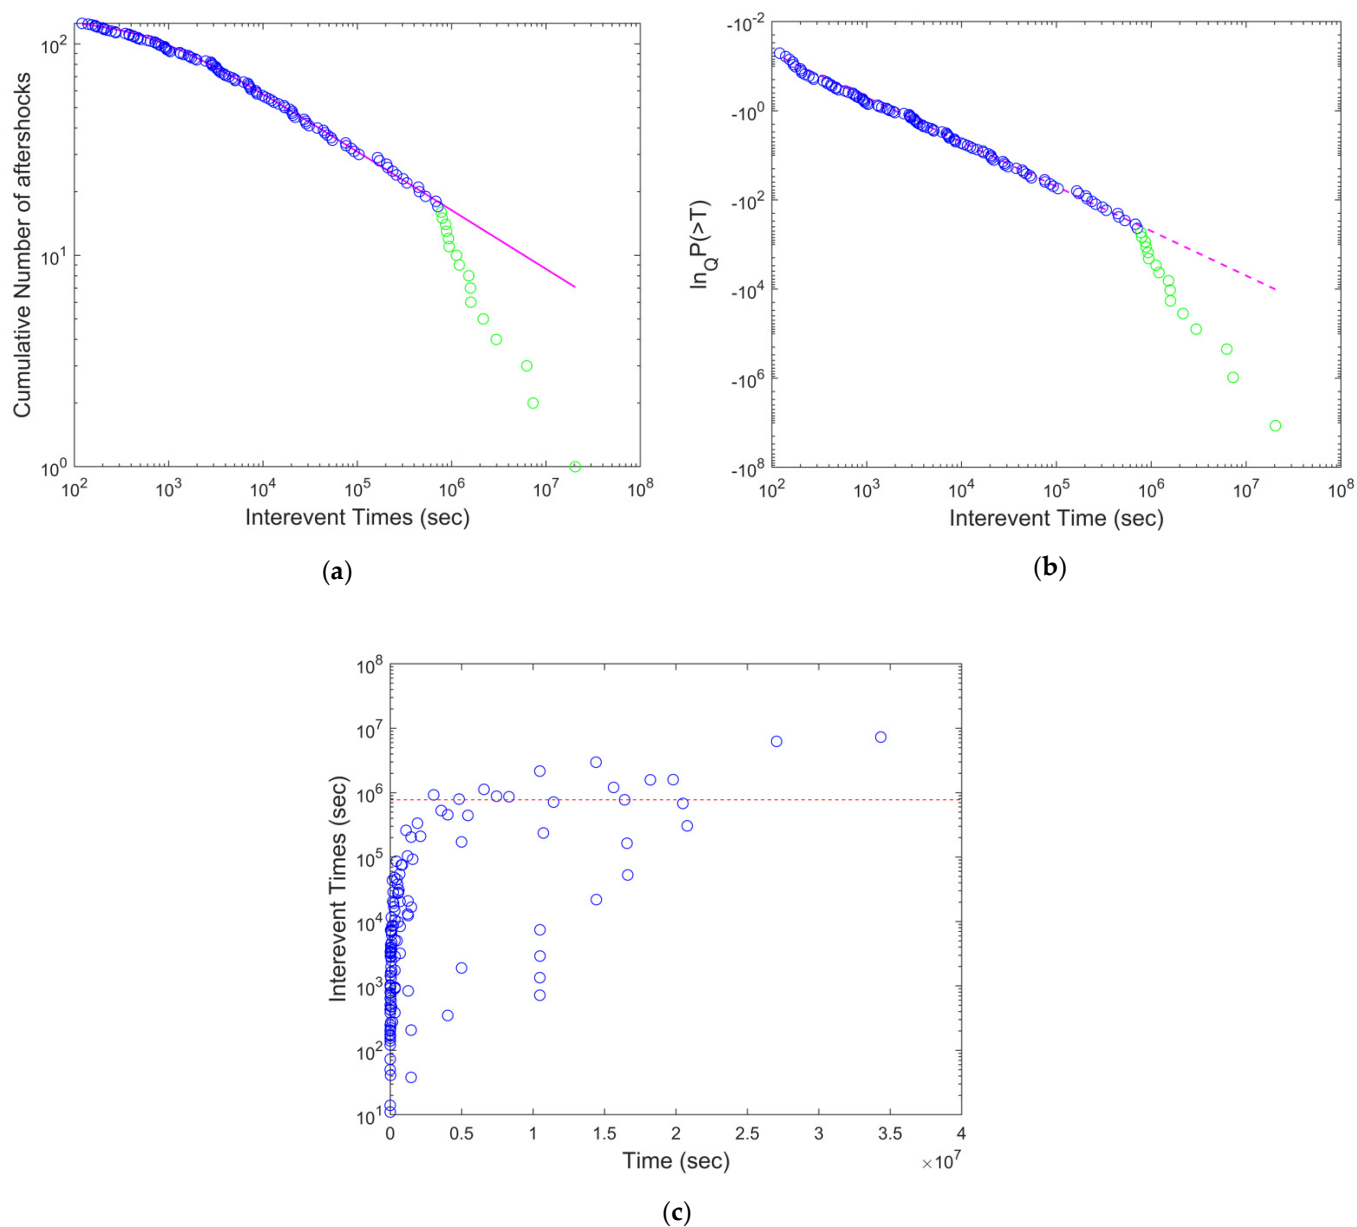

**Figure S37.** (a) The cumulative distribution function of the interevent times for the 2018  $M_w$  7.3 Uts'-Kamchatsk Staryy (Russia) Earthquake. The magenta line is the Q-exponential function fitting with  $q = 1.78$ . (b) The Q-logarithmic function of  $P(>T)$  as a function of the interevent times, where the dashed line is the fitting with  $q = 1.78$ . The deviation from linearity suggests  $T_c$  values close to  $8 \times 10^5$  s. The correlation coefficient for the Q-logarithmic function up to  $T_c$  is  $R^2 = 0.9870$ . (c) The evolution of the interevent time ( $T$ ) as a function of the time ( $t$ ) since the main event. The  $T_c$  value is indicated by the red dashed line.

### 38. The 2019 $M_w$ 7.6 Kokopo Earthquake (Papua New Guinea)

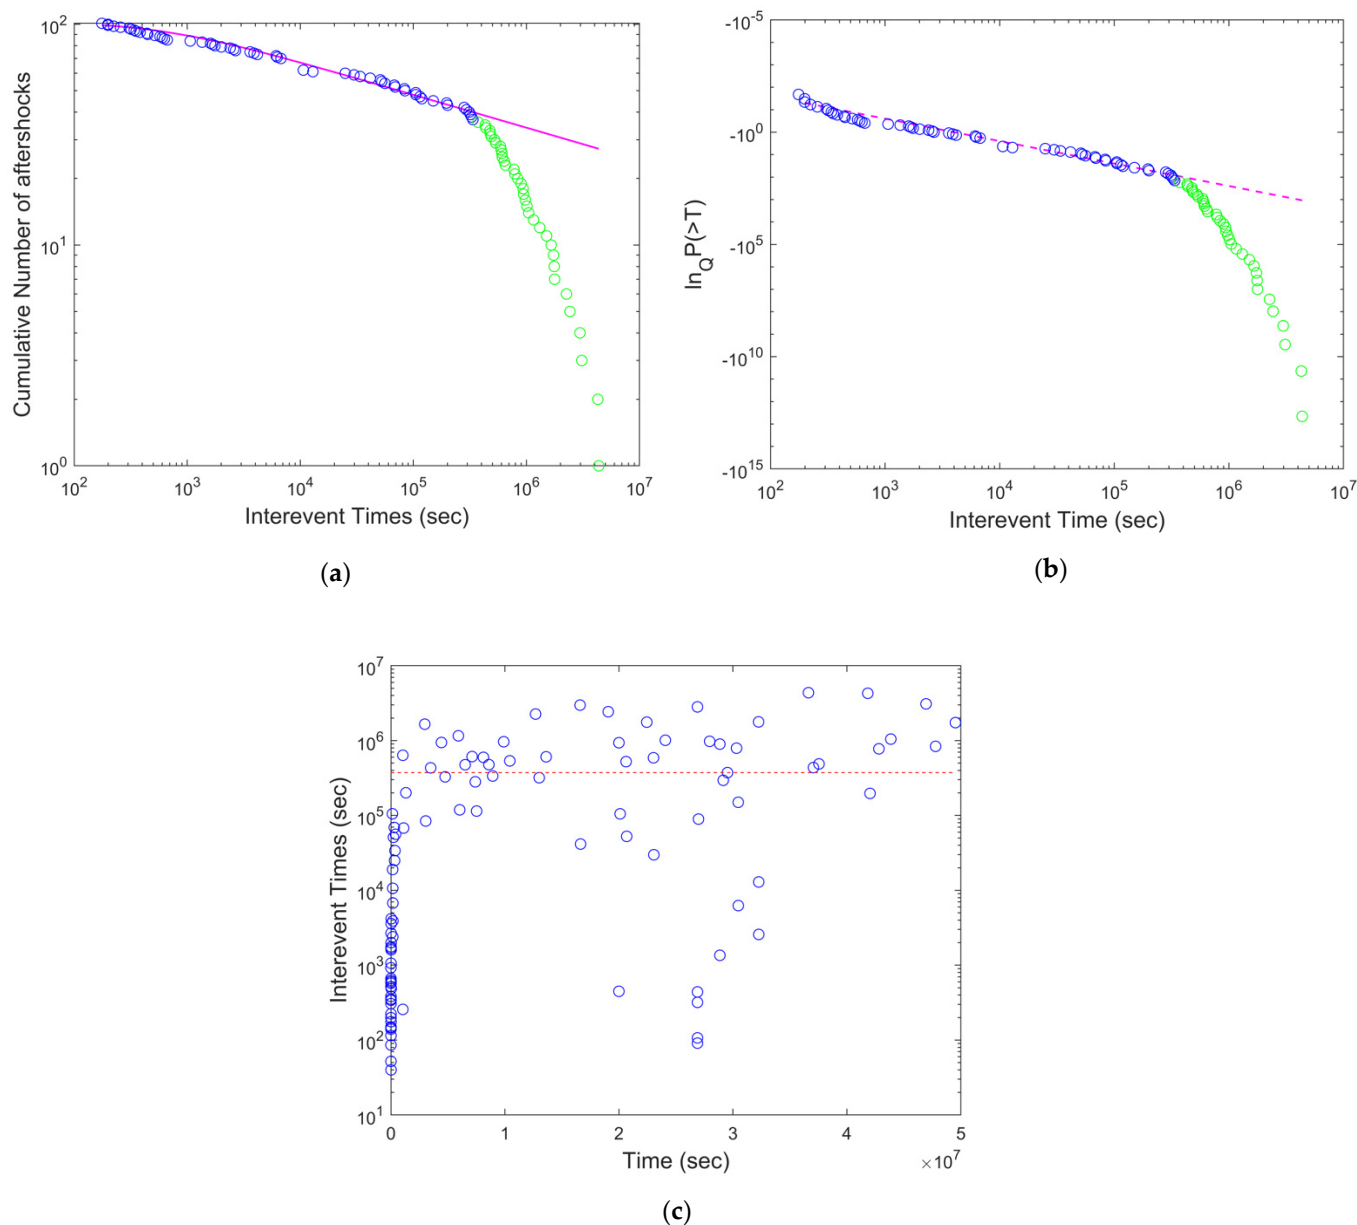

**Figure S38.** (a) The cumulative distribution function of the interevent times for the 2019  $M_w$  7.6 Kokopo Earthquake (Papua New Guinea). The magenta line is the Q-exponential function fitting with  $q = 1.86$ . (b) The Q-logarithmic function of  $P(>T)$  as a function of the interevent times, where the dashed line is the fitting with  $q = 1.86$ . The deviation from linearity suggests  $T_c$  values close to  $4 \times 10^5$  s. The correlation coefficient for the Q-logarithmic function up to  $T_c$  is  $R^2 = 0.9327$ . (c) The evolution of the interevent time ( $T$ ) as a function of the time ( $t$ ) since the main event. The  $T$  value is indicated by the red dashed line.

### 39. The 2019 $M_w$ 7.3 Kermadec Islands Earthquake (New Zealand)

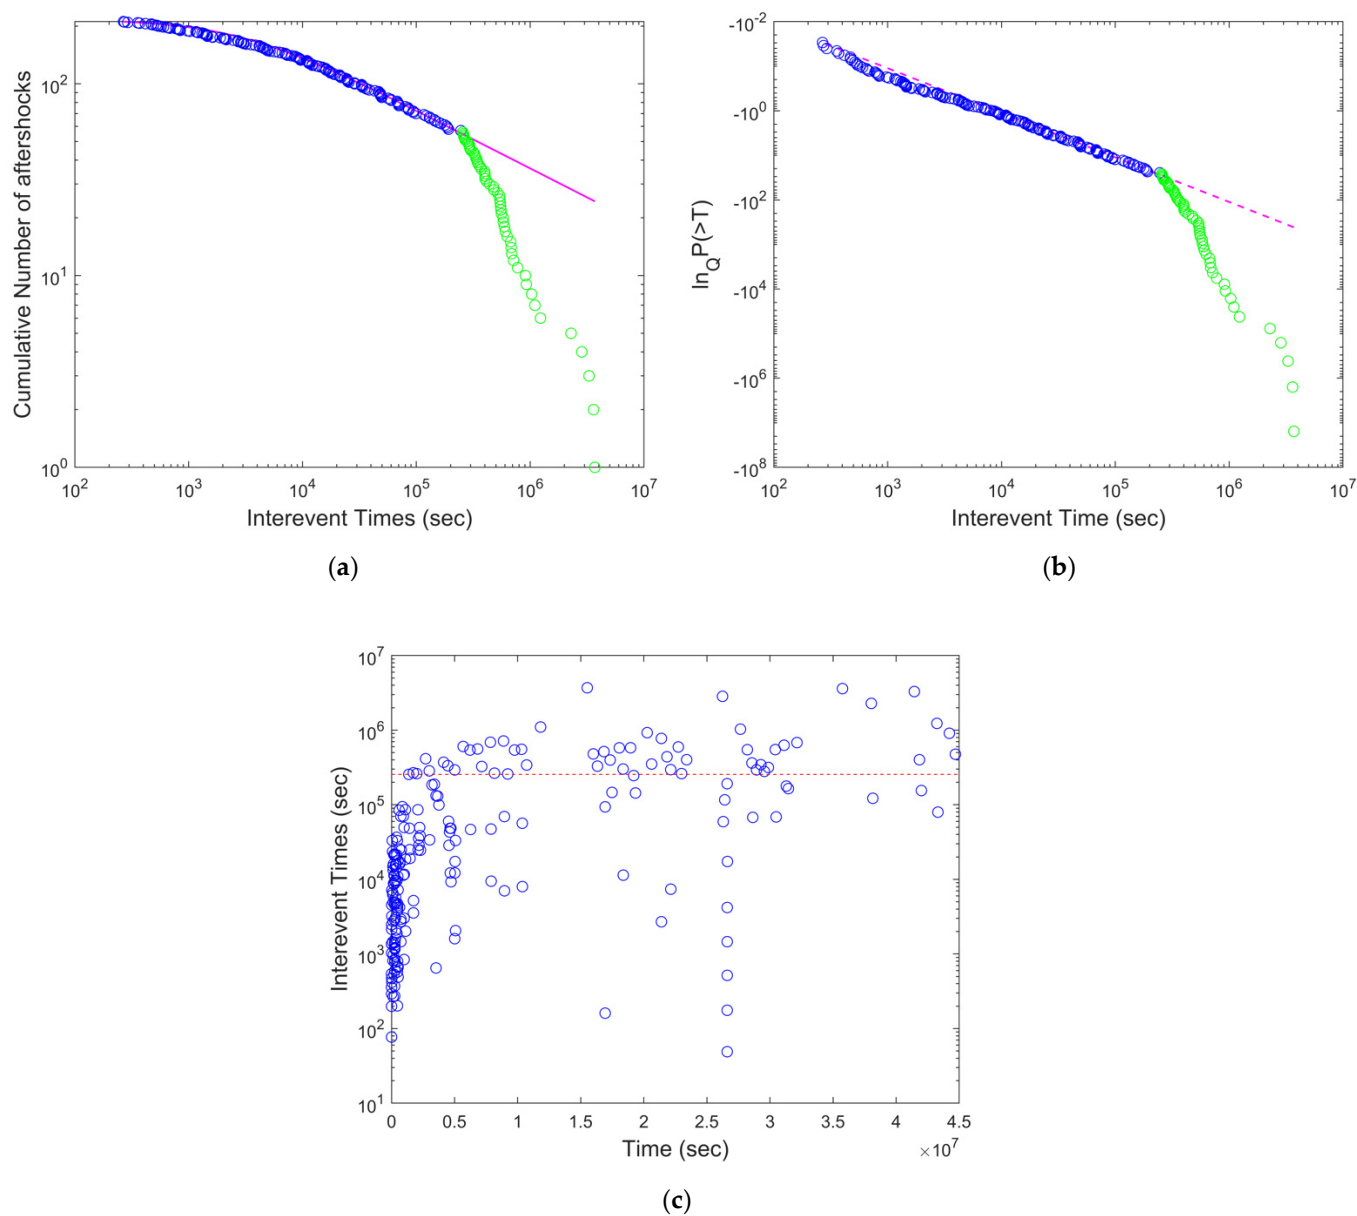

**Figure S39.** (a) The cumulative distribution function of the interevent times for the 2019  $M_w$  7.3 Kermadec Islands Earthquake (New Zealand). The magenta line is the Q-exponential function fitting with  $q = 1.75$ . (b) The Q-logarithmic function of  $P(>T)$  as a function of the interevent times, where the dashed line is the fitting with  $q = 1.75$ . The deviation from linearity suggests  $T_c$  values close to  $3 \times 10^5$  s. The correlation coefficient for the Q-logarithmic function up to  $T_c$  is  $R^2 = 0.9953$ . (c) The evolution of the interevent time ( $T$ ) as a function of the time ( $t$ ) since the main event. The  $T$  value is indicated by the red dashed line.

#### 40. The 2019 $M_w$ 7.1 Ternate (Indonesia) Earthquake

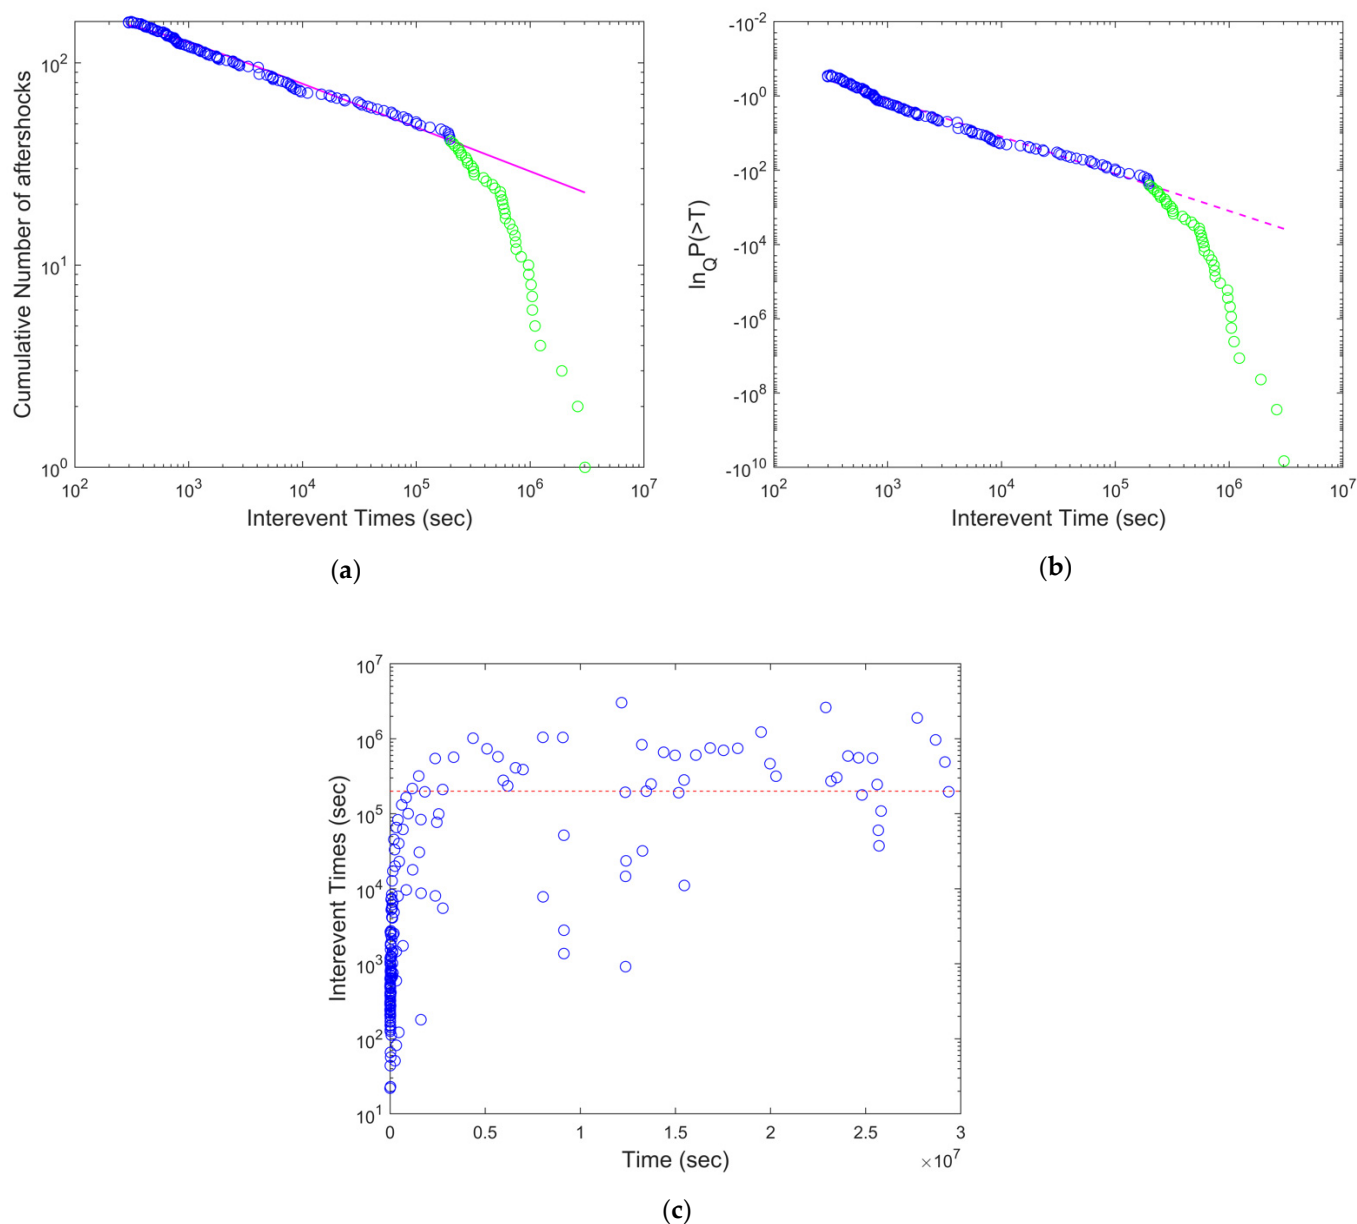

**Figure S40.** (a) The cumulative distribution function of the interevent times for the 2019  $M_w$  7.1 Ternate (Indonesia) Earthquake. The magenta line is the Q-exponential function fitting with  $q = 1.82$ . (b) The Q-logarithmic function of  $P(>T)$  as a function of the interevent times, where the dashed line is the fitting with  $q = 1.82$ . The deviation from linearity suggests  $T_c$  values close to  $2 \times 10^5$  s. The correlation coefficient for the Q-logarithmic function up to  $T_c$  is  $R^2 = 0.9834$ . (c) The evolution of the interevent time ( $T$ ) as a function of the time ( $t$ ) since the main event. The  $T$  value is indicated by the red dashed line.

#### 41. The 2020 $M_w$ 7.4 Kermadec Islands Earthquake (New Zealand)

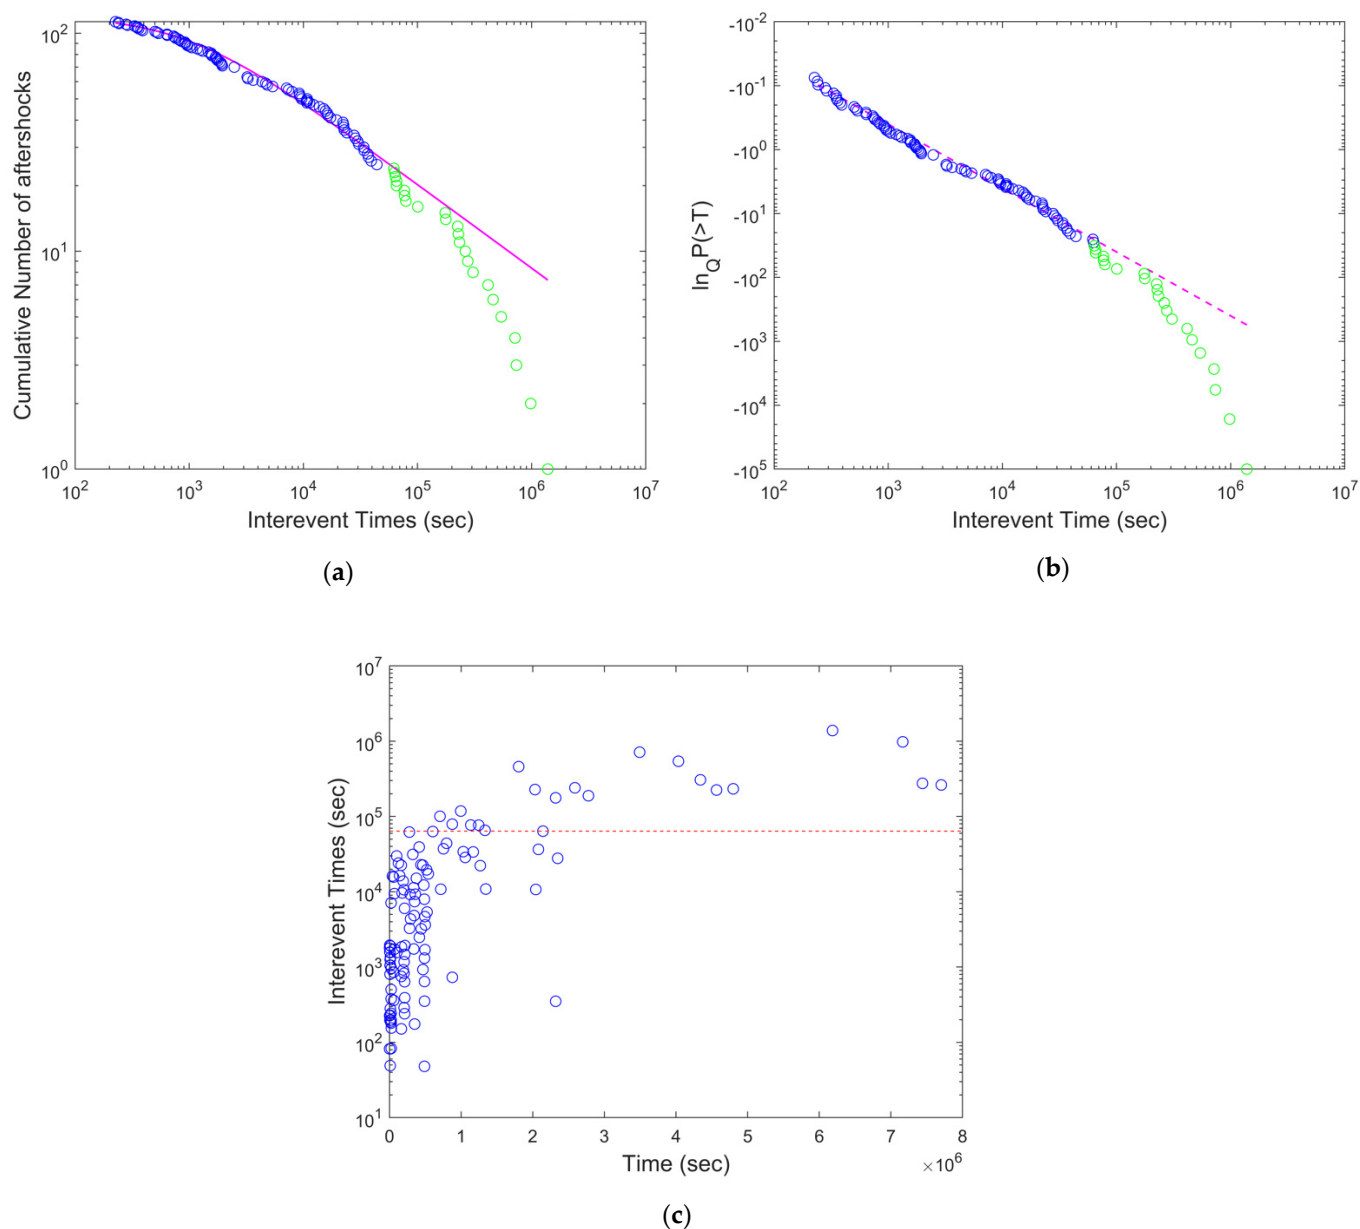

**Figure S41.** (a) The cumulative distribution function of the interevent times for the 2020  $M_w$  7.4 Kermadec Islands Earthquake (New Zealand). The magenta line is the Q-exponential function fitting with  $q = 1.72$ . (b) The Q-logarithmic function of  $P(>T)$  as a function of the interevent times, where the dashed line is the fitting with  $q = 1.72$ . The deviation from linearity suggests  $T_c$  values close to  $6 \times 10^4$  s. The correlation coefficient for the Q-logarithmic function up to  $T_c$  is  $R^2 = 0.9729$ . (c) The evolution of the interevent time ( $T$ ) as a function of the time ( $t$ ) since the main event. The  $T$  value is indicated by the red dashed line.

#### 42. The 2020 $M_w$ 7.8 Sand Point Earthquake (Alaska)

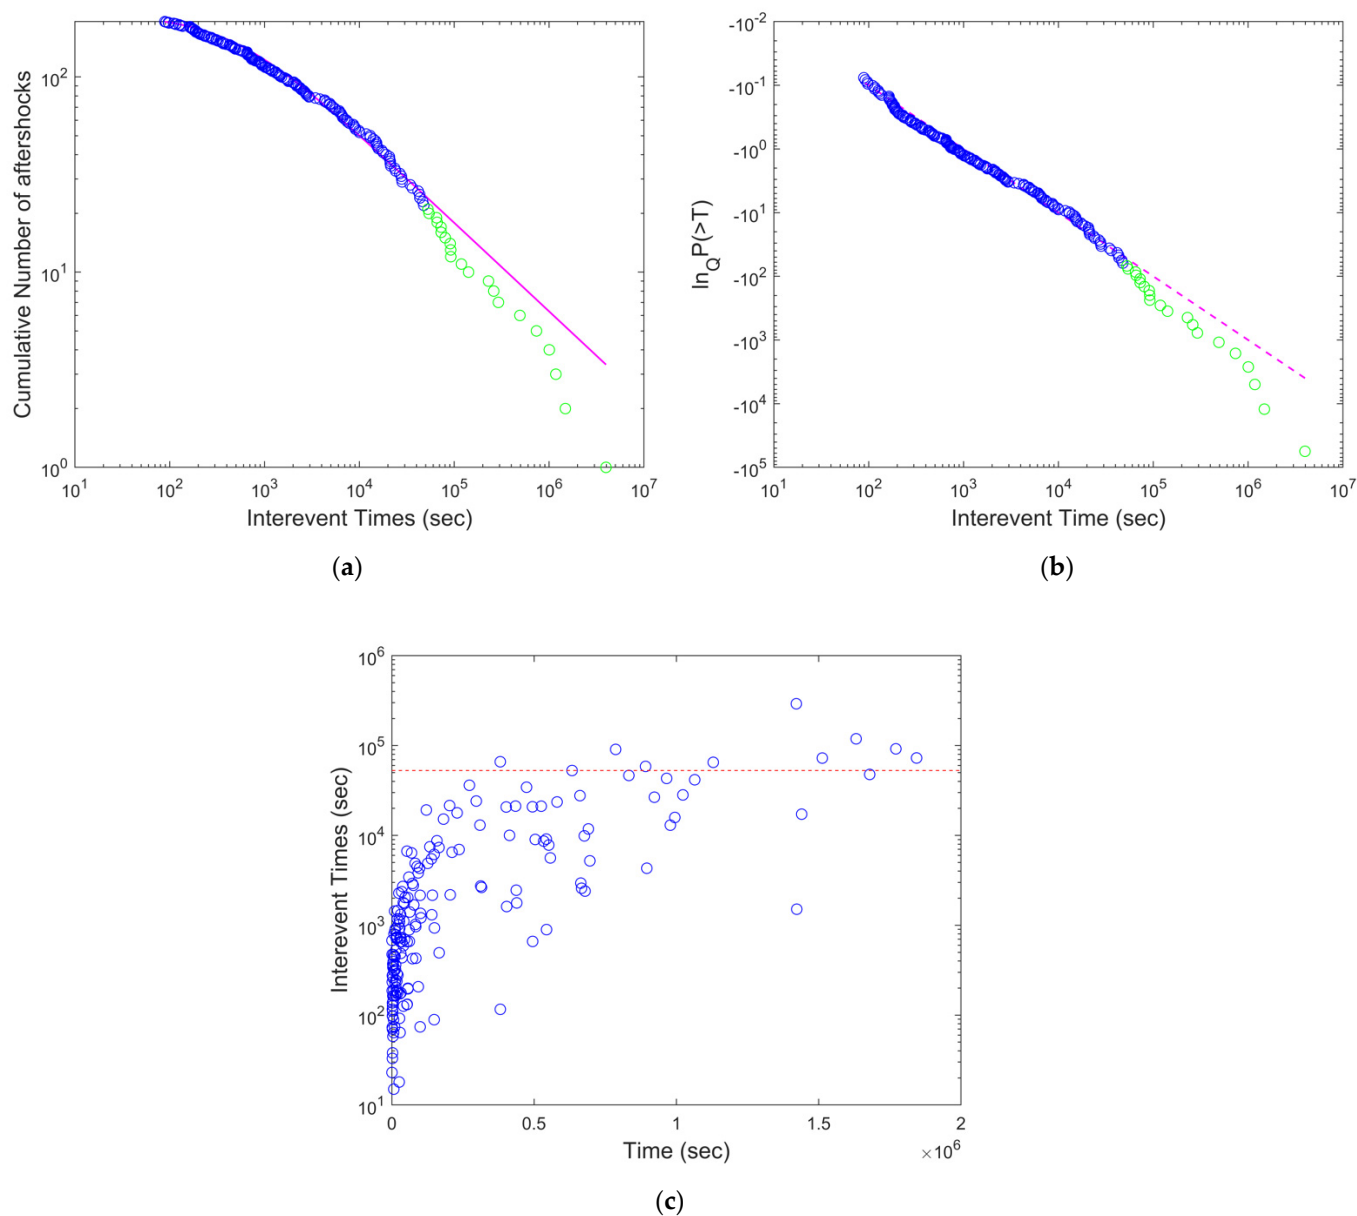

**Figure S42.** (a) The cumulative distribution function of the interevent times for the 2020  $M_w$  7.8 Sand Point Earthquake (Alaska). The magenta line is the Q-exponential function fitting with  $q = 1.69$ . (b) The Q-logarithmic function of  $P(>T)$  as a function of the interevent times, where the dashed line is the fitting with  $q = 1.69$ . The deviation from linearity suggests  $T_c$  values close to  $5 \times 10^4$  s. The correlation coefficient for the Q-logarithmic function up to  $T_c$  is  $R^2 = 0.9775$ . (c) The evolution of the interevent time ( $T$ ) as a function of the time ( $t$ ) since the main event. The  $T$  value is indicated by the red dashed line.
